# Supplementary material for: Health system reforms, violence against doctors and job satisfaction in the medical profession: a cross-sectional survey in Zhejiang Province, Eastern China
Source: PubMed Central journal article supplement — BMJ Open. 2014 Dec 31;4(12):e006431. doi: 10.1136/bmjopen-2014-006431 (PMC4281536; doi:10.1136/bmjopen-2014-006431), 2014-12-31
Supplement: bmjopen-2014-006431.draft_revisions.pdf [file bmjopen-2014-006431.draft_revisions.pdf]

# BMJ Open

## Health system reforms, violence against doctors and job satisfaction in the medical profession: a cross-sectional survey in Zhejiang Province, Eastern China

|                                 |                                                                                                                                                                                                                                                                                                                                                     |
|---------------------------------|-----------------------------------------------------------------------------------------------------------------------------------------------------------------------------------------------------------------------------------------------------------------------------------------------------------------------------------------------------|
| Journal:                        | <i>BMJ Open</i>                                                                                                                                                                                                                                                                                                                                     |
| Manuscript ID:                  | bmjopen-2014-006431                                                                                                                                                                                                                                                                                                                                 |
| Article Type:                   | Research                                                                                                                                                                                                                                                                                                                                            |
| Date Submitted by the Author:   | 20-Aug-2014                                                                                                                                                                                                                                                                                                                                         |
| Complete List of Authors:       | Wu, Dan; The University of Hong Kong, Department of Family Medicine and Primary Care<br>Wang, Yun; The University of Hong Kong, Centre for Suicide Research and Prevention<br>Lam, Kwok Fai; The University of Hong Kong, Department of Statistics and Actuarial Science<br>Hesketh, Therese; University College London, Institute of Global Health |
| <b>Primary Subject Heading</b>: | Health policy                                                                                                                                                                                                                                                                                                                                       |
| Secondary Subject Heading:      | Health policy, Health services research                                                                                                                                                                                                                                                                                                             |
| Keywords:                       | health reform, China, patient aggression, doctors, job satisfaction                                                                                                                                                                                                                                                                                 |
|                                 |                                                                                                                                                                                                                                                                                                                                                     |

SCHOLARONE™  
Manuscripts

1  
2  
3 **Health system reforms, violence against doctors and job satisfaction in the**  
4 **medical profession: a cross-sectional survey in Zhejiang Province, Eastern China**  
5  
6  
7

8 **Dan WU<sup>1</sup>, Yun WANG<sup>2</sup>, Kwok Fai LAM<sup>3</sup>, Therese HESKETH<sup>4,\*</sup>**  
9

10  
11 <sup>1</sup> Department of Family Medicine and Primary Care, Faculty of Medicine, The  
12 University of Hong Kong, Hong Kong  
13

14  
15  
16 <sup>2</sup> Centre for Suicide Research and Prevention, Faculty of Social Sciences, The  
17 University of Hong Kong, Hong Kong  
18

19  
20  
21 <sup>3</sup> Department of Statistics and Actuarial Science, Faculty of Science, The University  
22 of Hong Kong, Hong Kong  
23

24  
25  
26 <sup>4</sup> UCL Institute of Global Health, Guilford St., London, UK  
27

28  
29  
30 \*Correspondence to Professor Therese Hesketh, UCL Institute for Global Health, 30  
31 Guilford Street, London WC1N 1EH, UK; Email: [t.hesketh@ich.ucl.ac.uk](mailto:t.hesketh@ich.ucl.ac.uk); Tel:  
32 +207-905-2253  
33  
34  
35

36  
37 **Keywords:** health reform, China, patient aggression, doctors, job satisfaction,  
38

39 Word count: 3844  
40

41 Number of tables and/or figures: 5  
42

43 Number of references: 52  
44

45 Checklist used for structuring the article: STROBE  
46  
47  
48  
49  
50  
51  
52  
53  
54  
55  
56  
57  
58  
59  
60

## Abstract

**Objective:** To explore the factors influencing doctors' job satisfaction and morale in China, in the context of the ongoing health system reforms and the deteriorating doctor-patient relationship

**Design:** Cross-sectional survey using self-completion questionnaires.

**Study setting:** The survey was conducted from March to May 2012 among doctors at provincial, county and primary care levels, in Zhejiang Province, China.

**Results:** The questionnaire was completed by 202 doctors. Factors which contributed most to low job satisfaction were low income and long working hours. Provincial level doctors were most dissatisfied while primary care doctors were the least dissatisfied. Three percent of doctors at high-level hospitals and 27% of those in primary care were satisfied with the salary. Only 7% at high-level hospitals were satisfied with work hours, compared to 43% in primary care. Less than 10% at high levels were satisfied with amount of paid vacation time (3%) and paid sick leave (5%), compared with 38% and 41% respectively in primary care.

Overall, 87% reported that patients were more likely to sue and that patient violence against doctors was increasing. Only 4.5% wanted their children to be doctors. Of those 125 who provided a reason, 34% said poor pay, 17% said it was a high-risk profession, and 9% expressed concerns about personal insecurity or patient violence.

**Conclusions:** Doctors have low job satisfaction overall. Recruitment and retention of doctors have become major challenges for the Chinese health system. Measures must be taken to address this in order to prevent a serious human resource crisis in the

1  
2  
3 profession. These measures must include reduction of doctors' workload especially at  
4  
5 provincial hospitals, increase in doctors' salary and more effective measures tackling  
6  
7 patient violence against doctors.  
8  
9

#### 10 11 12 13 14 **Strengths and limitations of this study**

- 15  
16  
17 • Our study is one of the first studies investigating doctors' job satisfaction in China  
18 since the instigation of the health reforms in 2009.
- 19  
20  
21 • We compared doctors' job satisfaction across three levels of health facility and  
22 explored associated systemic factors.
- 23  
24  
25 • Our study documented for the first time that the increasing patient violence is a  
26 major contributor to doctors' low morale
- 27  
28  
29 • The generalizability of the study is constrained by the limited number of  
30 participating health facilities and the small sample size.  
31  
32  
33  
34  
35  
36  
37  
38  
39  
40  
41  
42  
43  
44  
45  
46  
47  
48  
49  
50  
51  
52  
53  
54  
55  
56  
57  
58  
59  
60

## INTRODUCTION

The Chinese medical profession is facing a human resource crisis. Evidence from a number of sources illustrates low levels of morale in the profession. In a study of 933 doctors in 29 public hospitals in Shandong province, 49% said they intended to leave the profession.<sup>1</sup> Other studies have shown that only 24% of doctors would choose the profession if they had a second chance<sup>2</sup> and 78% would not want their own children to be doctors.<sup>3</sup> At Shanghai Jiao Tong University, which is among the top five in the country, 10% of the second year medical students transferred to other majors in 2013.<sup>4</sup> These worrying manifestations of discontent come at a time when more doctors are needed, given the pressures of an ageing population<sup>5</sup> and a growing non-communicable diseases burden.<sup>6</sup> Recruitment and retention of doctors have become major challenges for the health system in China.<sup>7</sup>

There is evidence that this situation is worsening<sup>8</sup>, so urgent measures are needed to reverse this trend. Clearly, such measures need to include addressing the underlying causes of this discontent. The aim of this study was to explore these underlying causes through surveying the views of doctors working at three levels of the health system: tertiary, secondary and primary care. Primary level facilities are supposed to provide preventive and basic medical services, while secondary and tertiary hospitals provide specialized care. The study was conducted in 2012, three years after the inception of major health system reforms, aiming to provide universal healthcare by 2020 with a focus on strengthening primary care. The reforms have also had impacts on doctors' working conditions: changes to health insurance have made healthcare more affordable at all levels, resulting in increased workload for doctors, especially at

1  
2  
3 secondary and tertiary level hospitals, even for minor illness. The introduction of an  
4 essential drug list for primary care, which aims to reduce perverse incentives for  
5 overprescribing to forbid profit on drugs, has reduced doctors' autonomy and reduced  
6 their income.<sup>9</sup> This loss of income from the mark-up in primary care has been  
7 replaced with a fixed salary and in some places a performance-based bonus, which in  
8 most cases is lower than previous earnings.<sup>10</sup>

9  
10  
11  
12  
13  
14  
15  
16  
17 Another important contributor to morale is a recent deterioration in the doctor-patient  
18 relationship.<sup>11</sup> The most extreme manifestation of this is a rise in levels of violence  
19 against health workers, along with damage and disturbance to health facilities. In  
20 China, this phenomenon is known as Yi Nao, which translates as (medical or hospital  
21 disturbance). This is usually caused by patients or their relatives as a reaction to what  
22 may be perceived, rightly or wrongly, as failures or mistakes by hospital staff.  
23 Sometimes the situation escalates with aggrieved patients and relatives hiring criminal  
24 gangs, prepared to go to extreme lengths, to threaten the hospital to provide  
25 compensation.<sup>12</sup> Yi Nao events are not rare. The Ministry of Health reported that the  
26 number of "major disturbances" involving physical violence nearly doubled from  
27 9,831 in 2006 to 17,243 in 2010.<sup>13</sup> In a 2006 study of 270 hospitals, over 70%  
28 reported that they had experienced Yi Nao incidents.<sup>14</sup> A study of 12 hospitals in 2009  
29 revealed that, of 2,464 medical professionals, 50% experienced workplace violence  
30 over the last 12 months, with 20% encountering physical abuse at least once.<sup>15</sup> A 2012  
31 survey conducted by the Chinese Hospital Association in 316 public hospitals in 30  
32 provinces revealed that the proportion of hospitals, which reported incidents of  
33 physical violence causing harm, had increased from 48% in 2008 to 64% in 2012. Of  
34 these, 8% of hospitals reported six or more incidents of physical violence every  
35  
36  
37  
38  
39  
40  
41  
42  
43  
44  
45  
46  
47  
48  
49  
50  
51  
52  
53  
54  
55  
56  
57  
58  
59  
60

1  
2  
3 year.<sup>16</sup> Violence against health personnel is not unique to China. It has been reported  
4  
5 from many other countries, including countries as diverse as the UK, US, Italy, Saudi  
6  
7 Arabia, Pakistan and Japan.<sup>17-25</sup> And many other countries are facing challenges with  
8  
9 the recruitment and retention of doctors.<sup>26</sup> Therefore, lessons from the Chinese  
10  
11 experience are relevant for other countries.  
12  
13

14  
15 The overall objectives of this study were: 1) to explore the factors influencing  
16  
17 doctors' job satisfaction and morale, with a special focus on the impacts of health  
18  
19 system reforms and the deteriorating doctor-patient relationship, and 2) to compare  
20  
21 doctors working at the three levels in the Chinese health system.  
22  
23

## 24 25 **METHODS**

### 26 27 **Sampling and data collection**

28  
29 This study was conducted from March to May 2012 in health facilities in Zhejiang  
30  
31 province, Eastern China. Zhejiang has a population of 55million and is ranked fourth  
32  
33 in terms of GDP per capita among China's 33 provinces.  
34  
35  
36  
37  
38

39  
40 A multi-stage stratified purposive sampling method was adopted (Table 1). We first  
41  
42 selected four cities or counties which represented high (Hangzhou and Yiwu), middle  
43  
44 (Anji) and low-level (Xianju) economic development in Zhejiang province. In the  
45  
46 second stage 10 health facilities were purposively sampled in the four cities/counties  
47  
48 to represent a range of health facilities: in urban areas a multi-specialism provincial  
49  
50 hospital (tertiary level) in Hangzhou, the main county hospitals (secondary level) in  
51  
52 Anji and Xianju respectively, and two community health centres/township health  
53  
54 centres (providers of primary care in urban and rural areas) in each city/county were  
55  
56  
57  
58  
59  
60

invited to participate (one in Xianju county refused). In total, four community health centres (CHCs) in urban cities and three township health centres (THCs) in rural counties were selected based on their general representativeness in the city/county.

Table 1 Sampling strategy and achieved sample size by area

| Cities   | Income level  | Participating hospitals | Sample size | Total sample size |
|----------|---------------|-------------------------|-------------|-------------------|
| Hangzhou | High-income   | 1 provincial hospital   | 48          | 60                |
|          |               | 2 CHCs <sup>a</sup>     | 12          |                   |
| Yiwu     | High-income   | 2 CHCs                  | 54          | 54                |
| Anji     | Middle-income | 1 county hospital       | 24          | 41                |
|          |               | 2 THCs <sup>b</sup>     | 17          |                   |
| Xianju   | Low-income    | 1 county hospital       | 19          | 47                |
|          |               | 1 THC                   | 28          |                   |
| Total    |               | 10                      |             | 202               |

<sup>a</sup>CHCs: Community Health Centres

<sup>b</sup>THCs: Township Health Centres

At provincial level hospitals and county hospitals participants were internal medical doctors and surgeons, who were present in inpatient wards at the time of the survey.

At CHCs and THCs, primary care physicians present in clinics at the time of the survey were recruited.

Prospective participants were told that the questionnaire was about job satisfaction, that completion was voluntary, and that respondent anonymity and confidentiality would be strictly protected. Ethical approval was obtained from University College London. Local approvals were obtained from Zhejiang Health Bureau and local health authorities.

### Measurement methods



1  
2  
3 We developed the questionnaire based partly on existing questionnaires<sup>27-30</sup> with some  
4 items added and modified to specifically reflect the Chinese setting. Most questions  
5 used a five-point Likert scale ranging from 1 (not satisfied at all or strongly disagree)  
6 to 5 (extremely satisfied or strongly agree). The questionnaire included items about  
7 job satisfaction in general, perceptions about patients' health seeking behaviours and  
8 experience of patient aggression. Reverse scoring was used for questions phrased in  
9 the negative. The questionnaire was piloted, and modifications were made according  
10 to feedback.  
11  
12  
13  
14  
15  
16  
17  
18  
19

### 20 21 22 **Statistical analysis**

23  
24  
25 The data were analysed using IBM SPSS version 21. Comparisons between three  
26 levels of facility were conducted using Chi-square tests. We generated an overall job  
27 satisfaction score by computing the mean of 19 satisfaction items. The satisfaction  
28 score ranges from 1 (the lowest satisfaction) to 5 (the highest satisfaction). A higher  
29 score means higher satisfaction level. Analysis of Covariance (ANCOVA) was  
30 performed to compare satisfaction scores by level of response of associated factors  
31 controlling for gender, age and education.  
32  
33  
34  
35  
36  
37  
38  
39  
40

## 41 42 **RESULTS**

### 43 44 45 **Sample characteristics**

46  
47  
48 Characteristics of the study sample are shown in Table 2. Two hundred and two  
49 doctors completed questionnaires with a response rate of 81%. Forty-eight were from  
50 the provincial hospital, 43 from county hospitals, and 111 from primary care facilities.  
51  
52  
53 The mean age was 35.2 (SD=7.6), and 105 doctors were male, with 85 female. Only  
54  
55  
56  
57  
58  
59  
60

29% of primary care doctors had an undergraduate degree compared with 93% and 96% at county and provincial level respectively.

Table 2 Characteristics of the sample and basic working conditions by level of hospital n (%)

|                                             | Total<br>N=202 | Level of hospital |                |                    | p value<br>( $\chi^2$ tests) |
|---------------------------------------------|----------------|-------------------|----------------|--------------------|------------------------------|
|                                             |                | CHCs<br>N=111     | County<br>N=43 | Provincial<br>N=48 |                              |
| <b>Age (mean and SD)</b>                    | 35.2(7.6)      | 36.1(8.6)         | 34.2(7.4)      | 34.0(4.1)          | 0.196                        |
| <b>Gender</b>                               |                |                   |                |                    | 0.001                        |
| Male                                        | 105(52.0)      | 45(40.5)          | 33(76.7)       | 27(56.3)           |                              |
| Female                                      | 85(42.1)       | 59(53.2)          | 10(23.3)       | 16(33.3)           |                              |
| Missing                                     | 12(5.9)        | 7(6.3)            | 0              | 5(10.4)            |                              |
| <b>Education level</b>                      |                |                   |                |                    | 0.000                        |
| Post-secondary level or less                | 78(38.6)       | 75(67.6)          | 3(7.0)         | 0(0)               |                              |
| Undergraduate or higher                     | 118(58.4)      | 32(28.8)          | 40(93.0)       | 46(95.8)           |                              |
| Missing                                     | 6(3.0)         | 4(3.6)            | 0              | 2(4.2)             |                              |
| <b>Position rank</b>                        |                |                   |                |                    | 0.001                        |
| Low                                         | 81(40.1)       | 51(45.9)          | 21(48.8)       | 9(18.8)            |                              |
| Middle                                      | 81(40.1)       | 36(32.4)          | 16(37.2)       | 29(60.4)           |                              |
| High                                        | 18(8.9)        | 4(3.6)            | 6(14.0)        | 8(16.7)            |                              |
| Missing                                     | 22(10.9)       | 20(18.0)          | 0              | 2(4.2)             |                              |
| <b>Work hours/week</b>                      |                |                   |                |                    | 0.000                        |
| < 40                                        | 16(8.2)        | 15(13.5)          | 0              | 1(2.1)             |                              |
| 40 to 50                                    | 60(30.6)       | 42(37.8)          | 13(30.2)       | 5(10.4)            |                              |
| 50 to 60                                    | 48(24.5)       | 27(24.3)          | 10(23.3)       | 11(22.9)           |                              |
| ≥ 60                                        | 72(36.7)       | 23(20.7)          | 20(46.5)       | 29(60.4)           |                              |
| Missing                                     | 6(3.0)         | 4(3.6)            | 0              | 2(4.2)             |                              |
| <b>Outpatient visits per doctor per day</b> |                |                   |                |                    | 0.000                        |
| < 50                                        | 67(33.2)       | 45(40.5)          | 17(39.5)       | 5(10.4)            |                              |
| 50 to 100                                   | 58(28.7)       | 34(30.6)          | 13(30.2)       | 11(22.9)           |                              |
| ≥100                                        | 27(13.4)       | 3(2.7)            | 2(4.7)         | 22(45.8)           |                              |
| Not applicable                              | 40(20.8)       | 24(21.6)          | 9(20.9)        | 7(14.6)            |                              |
| Missing                                     | 10(5.0)        | 5(4.5)            | 2(4.7)         | 3(6.3)             |                              |
| <b>Average visit time/patient (minutes)</b> |                |                   |                |                    | 0.001                        |
| ≤ 4                                         | 32(15.8)       | 8(7.2)            | 6(14.0)        | 18(37.5)           |                              |
| 5-9                                         | 83(41.1)       | 46(41.4)          | 21(48.8)       | 16(33.3)           |                              |
| 10-14                                       | 31(15.3)       | 18(16.2)          | 8(18.6)        | 5(10.4)            |                              |

|                                    |           |          |          |          |       |
|------------------------------------|-----------|----------|----------|----------|-------|
| 15-20                              | 10(5.0)   | 7(6.3)   | 1(2.3)   | 2(4.2)   |       |
| ≥20                                | 5(2.5)    | 4(3.6)   | 1(2.3)   | 0(0)     |       |
| Not applicable                     | 33(16.3)  | 24(21.6) | 4(9.3)   | 5(10.4)  |       |
| Missing                            | 8(4.0)    | 4(3.6)   | 2(4.7)   | 2(4.2)   |       |
| <b>Overtime hours per week</b>     |           |          |          |          | 0.000 |
| < 10                               | 103(51.0) | 69(62.2) | 23(53.5) | 11(22.9) |       |
| 10 to 30                           | 74(36.6)  | 35(31.5) | 15(34.9) | 24(50.0) |       |
| ≥ 30                               | 17(8.4)   | 2(1.8)   | 4(9.3)   | 11(22.9) |       |
| Missing                            | 8(4.0)    | 5(4.5)   | 1(2.3)   | 2(4.2)   |       |
| <b>On-call duties</b>              |           |          |          |          | 0.000 |
| Yes                                | 131(64.9) | 53(47.7) | 35(81.4) | 43(89.6) |       |
| No                                 | 61(30.2)  | 52(46.8) | 7(16.3)  | 2(4.2)   |       |
| Missing                            | 10(5.0)   | 6(5.4)   | 1(2.3)   | 3(6.2)   |       |
| <b>Monthly salary</b>              |           |          |          |          | 0.000 |
| < 1,000 RMB                        | 20(10.2)  | 2(1.8)   | 16(37.2) | 2(4.2)   |       |
| 1,000 – 3,000 RMB                  | 146(74.1) | 84(75.7) | 27(62.8) | 35(72.9) |       |
| 3,000 – 5,000 RMB                  | 29(14.7)  | 21(18.9) | 0        | 8(16.7)  |       |
| ≥ 5,000 RMB                        | 2(1.0)    | 1(0.9)   | 0        | 1(2.1)   |       |
| Missing                            | 5(2.5)    | 3(2.7)   | 0        | 2(4.2)   |       |
| <b>Total bonus last year (RMB)</b> |           |          |          |          | 0.000 |
| < 10,000                           | 34(17.4)  | 27(24.3) | 4(9.3)   | 3(6.2)   |       |
| 10,000 – 30,000                    | 106(54.4) | 57(51.4) | 35(81.4) | 14(29.1) |       |
| 30,000 – 50,000                    | 43(22.1)  | 16(14.4) | 4(9.3)   | 23(47.9) |       |
| 50,000 – 100,000                   | 9(4.6)    | 7(6.3)   | 0        | 2(4.2)   |       |
| 100,000 or higher                  | 3(1.5)    | 0        | 0        | 3(6.3)   |       |
| Missing                            | 7(3.5)    | 4(3.6)   | 0        | 3(6.3)   |       |
| <b>The need to do research</b>     |           |          |          |          | 0.000 |
| Yes                                | 88(44.9)  | 30(27.0) | 18(41.9) | 40(83.3) |       |
| No                                 | 108(55.1) | 77(69.3) | 25(58.2) | 6(6.3)   |       |
| Missing                            | 6(3.0)    | 4(3.6)   | 0        | 2(4.2)   |       |

### Workload and pay (Table 2)

Workload varied considerably with level of hospital. Provincial hospital doctors worked the longest hours, 60% routinely worked more than 60 hours per week with 23% working more than 30 hours per week in overtime (additional work hours and on a “forced voluntary” basis largely due to heavy workload). For county level doctors these figures were 47% and 9%, and primary level doctors reported 21% and 2%.

1  
2  
3 Sixty-nine percent of provincial hospital doctors saw over 50 patients in clinic per day  
4  
5 with 46% seeing over 100 patients a day. Thirty-five per cent of doctors at secondary  
6  
7 level facilities saw over 50 outpatients per day and 33% at the primary level. Not  
8  
9 surprisingly, consultation times were reported to be very short. Nearly 38% of  
10  
11 provincial hospital doctors spent 4 minutes or less on average for each outpatient.  
12  
13 These compared to 14% in county hospitals, and 7% in primary care. Ninety per cent  
14  
15 of doctors at the provincial hospital reported that they did on-call duties (which  
16  
17 usually involved being available on site overnight to deal with referrals and  
18  
19 problems), followed by the county level (81%) and primary level (48%). Eighty-seven  
20  
21 percent of provincial hospital doctors were required to do research in order to be  
22  
23 eligible for promotion. This compared to 42% and 28% in county level and primary  
24  
25 care respectively.  
26  
27  
28  
29

30  
31 Remuneration consists of two parts: a basic salary and a bonus. For most doctors  
32  
33 (74%) their monthly salary was between 1,000 and 3,000 RMB (1 USD = 6.16RMB  
34  
35 in 2012), with only 1% paid more than 5,000 RMB per month and 29% paid between  
36  
37 3,000 and 5,000 RMB. Interestingly, 37% of county hospital doctors were paid less  
38  
39 than 1,000 RMB monthly and none of them earned over 3,000 RMB. But 19% and  
40  
41 17% respectively in primary care and tertiary hospitals were paid between 3,000 RMB  
42  
43 and 5,000 RMB. Up to 94% of junior doctors were paid 3,000 RMB or less, compared  
44  
45 to 77% middle ranked doctors and 65% of senior doctors. Annual bonuses, varied  
46  
47 mainly by the level of the hospital, 79% in primary care, 91% in secondary hospitals  
48  
49 and 38% in the tertiary hospital reported 30,000 RMB or less. Half (51%) in the  
50  
51 tertiary hospital received a bonus between 30,000 and 50,000, while only 15% and  
52  
53 9% respectively in primary and secondary hospitals earned this amount. Overall only  
54  
55  
56  
57  
58  
59  
60

1  
2  
3 12 doctors (6%) reported 50,000 RMB or more; seven of these were primary care  
4  
5 doctors, five tertiary care doctors with none being county hospital doctors. Of those  
6  
7 who did overtime, more than 80% were not paid for it.  
8  
9

### 10 **Job satisfaction**

11  
12  
13  
14 Doctors' satisfaction with various aspects of work and conditions is shown in Table 3.  
15  
16 Most striking are the differences between primary care practitioners and doctors in  
17  
18 higher-level hospitals (county and provincial hospitals). Very low proportions of  
19  
20 high-level hospital doctors were satisfied with their working conditions: only 7% at  
21  
22 high-level hospitals were satisfied with work hours, compared to 43% in primary care.  
23  
24 Percentages for satisfaction with basic salary were 3% and 27% respectively for  
25  
26 higher level and primary care. Similar variations in bonuses were reported (6% at  
27  
28 higher level versus 20% in primary care). Less than 10% at high levels were satisfied  
29  
30 with the amount of paid vacation time (3%), amount of paid sick leave (5%) and  
31  
32 opportunities for promotion (9%), with 38%, 41% and 25% respectively in primary  
33  
34 care. Interestingly, primary care doctors were most likely to feel they had high social  
35  
36 recognition (58%), compared with 29% at the provincial hospital and 23% at the  
37  
38 county hospitals. Work relationships showed high levels of satisfaction across all  
39  
40 health facilities. Levels of satisfaction with utilization of expertise, opportunity to  
41  
42 update expertise and support for training showed only small differences by level.  
43  
44  
45  
46  
47  
48  
49  
50  
51  
52  
53  
54  
55  
56  
57  
58  
59  
60

Table 3 Doctors' job satisfaction by level of hospital (% of completely satisfied or satisfied)

| Items                                            | Satisfied (%)       |                           |                      |                  |                      | p value<br>( $\chi^2$ tests) |
|--------------------------------------------------|---------------------|---------------------------|----------------------|------------------|----------------------|------------------------------|
|                                                  | Satisfied<br>No (%) | 95% CIs of<br>percentages | By level of hospital |                  |                      |                              |
|                                                  |                     |                           | CHCs<br>(N=111)      | County<br>(N=43) | Provincial<br>(N=48) |                              |
| <b>Work schedule and job reward</b>              |                     |                           |                      |                  |                      |                              |
| Hours of work                                    | 52(25.7)            | 20.2 - 32.2               | 46(42.6)             | 2(4.7)           | 4(8.30)              | 0.000                        |
| Flexibility in scheduling                        | 47(23.3)            | 18.0 - 29.6               | 38(35.5)             | 5(11.6)          | 4(8.30)              | 0.000                        |
| Geographical location of work                    | 118(58.4)           | 51.5 - 65.0               | 68(63.0)             | 24(57.1)         | 26(54.2)             | 0.439                        |
| Basic salary                                     | 32(15.8)            | 11.5 - 21.5               | 29(27.4)             | 0(0.0)           | 3(6.3)               | 0.000                        |
| Bonus                                            | 26(12.9)            | 8.9 - 18.2                | 21(20.0)             | 3(7.0)           | 2(4.2)               | 0.000                        |
| Benefits (insurances, travelling etc.)           | 41(20.3)            | 15.3 - 26.4               | 32(30.2)             | 6(14.0)          | 3(6.3)               | 0.000                        |
| Amount of paid vacation time offered             | 43(21.3)            | 16.2 - 27.4               | 40(37.7)             | 1(2.3)           | 2(4.2)               | 0.000                        |
| Amount of paid sick leave offered                | 48(23.8)            | 18.4 - 30.1               | 43(41.0)             | 3(7.0)           | 2(4.2)               | 0.000                        |
| Opportunities for Promotion                      | 34(16.8)            | 12.3 - 22.6               | 26(24.5)             | 4(9.8)           | 4(8.7)               | 0.004                        |
| Job security                                     | 94(46.5)            | 39.8 - 53.4               | 55(50.9)             | 15(36.6)         | 24(51.1)             | 0.536                        |
| Recognition for work by supervisors/senior staff | 113(55.9)           | 49.1 - 62.6               | 65(60.2)             | 22(52.4)         | 26(55.3)             | 0.742                        |
| Recognition in society                           | 87(43.1)            | 36.4 - 50.0               | 63(58.3)             | 10(23.3)         | 14(29.2)             | 0.000                        |
| <b>Work relationships</b>                        |                     |                           |                      |                  |                      |                              |
| Relationships with co workers                    | 168(83.2)           | 77.4 - 87.7               | 96(88.1)             | 37(86.0)         | 35(72.9)             | 0.116                        |
| Relationship(s) with supervisor(s)               | 142(70.3)           | 63.7 - 76.2               | 79(75.2)             | 35(81.4)         | 28(59.6)             | 0.032                        |
| Relationships with subordinates                  | 150(74.3)           | 67.8 - 79.8               | 85(86.7)             | 32(80.0)         | 33(73.3)             | 0.247                        |

|                                                             |           |             |          |          |          |       |
|-------------------------------------------------------------|-----------|-------------|----------|----------|----------|-------|
| Relationships with nurses                                   | 168(83.2) | 77.4 - 87.7 | 94(86.2) | 38(88.4) | 36(75.0) | 0.271 |
| <b>Use and update of professional knowledge</b>             |           |             |          |          |          |       |
| Opportunity to utilize your professional skills and talents | 105(52.0) | 45.1 - 58.8 | 60(56.1) | 21(48.8) | 24(51.1) | 0.938 |
| Opportunity to learn new skills and new knowledge           | 83(41.1)  | 34.5 - 48.0 | 42(38.9) | 16(37.2) | 25(52.1) | 0.573 |
| Support for training and education                          | 87(43.1)  | 36.4 - 50.0 | 49(47.6) | 19(44.2) | 19(39.6) | 0.914 |

**Patients' help seeking behaviours, demands and aggression (Table 4)**

Across all levels of facilities doctors felt patients were becoming more demanding: 84% reported that patients often went to higher level hospitals for simple medical problems which could be solved at primary care facilities, 80% said that patients just want to get drugs or tests rather than medical advice. Across all levels of facilities doctors reported that patients were becoming more aggressive in their demands, with perceptions of high and increasing levels of complaints from patients, who are much more likely to sue than previously, with 87% reporting that there was an increasing trend of violence against doctors. County level doctors consistently reported higher levels for all these items.



Table 4 Patients' help seeking behaviours, demands and aggression by level of hospital (% of strongly agree or agree)

| Items                                                                                                                                            | Agree<br>No (%) | 95% CIs<br>of<br>percentage | Agree(percent)  |                  |                      | p value<br>( $\chi^2$ tests) |
|--------------------------------------------------------------------------------------------------------------------------------------------------|-----------------|-----------------------------|-----------------|------------------|----------------------|------------------------------|
|                                                                                                                                                  |                 |                             | CHCs<br>(N=111) | County<br>(N=43) | Provincial<br>(N=48) |                              |
| Patients often go to higher level hospitals (e.g. tertiary hospitals) with simple complaints which could be dealt with at a lower level hospital | 169(83.7)       | 78.0 - 88.1                 | 95(87.2)        | 35(81.4)         | 39(83.0)             | 0.790                        |
| Sometimes patients just want to get drugs and tests rather than really seeking medical advice from doctors                                       | 162(80.2)       | 74.2 - 85.1                 | 84(79.2)        | 38(88.4)         | 40(85.1)             | 0.631                        |
| Nowadays patients are better informed about their own medical conditions so that sometimes they demand specific treatments from doctors          | 168(83.2)       | 77.4 - 87.7                 | 93(86.9)        | 36(85.7)         | 39(83.0)             | 0.949                        |
| Patients are becoming more aggressive in their demands                                                                                           | 144(71.3)       | 64.7 - 77.1                 | 66(60.6)        | 40(93.0)         | 38(80.9)             | 0.001                        |
| The number of complaints by patients has increased in recent years                                                                               | 153(75.7)       | 69.4 - 81.1                 | 77(72.6)        | 41(95.3)         | 35(72.9)             | 0.006                        |
| Patients are becoming more likely to sue them even when doctors are trying to do their best                                                      | 176(87.1)       | 81.8 - 91.1                 | 93(87.7)        | 43(100.0)        | 40(83.3)             | 0.107                        |
| Violence against doctors by their own patients is increasing                                                                                     | 176(87.1)       | 81.8 - 91.1                 | 92(86.8)        | 43(100.0)        | 41(85.4)             | 0.126                        |

### Influencing factors of job satisfaction

Analysis of Covariance (ANCOVA) comparing job satisfaction scores among sub-groups, adjusted by gender, age and education, are presented in Table 5. Doctors in the provincial hospital appeared to be the most dissatisfied group, and primary care physicians were most satisfied with their work ( $p < 0.001$ ). Those who had worked longer hours ( $p < 0.001$ ), did longer overtime hours ( $p < 0.05$ ), took on-call duties ( $p < 0.01$ ) were more likely to be dissatisfied. Doctors who reported average consultation times of 10-20 minutes per patient and higher monthly salary showed higher satisfaction ( $p < 0.01$ ). Doctors who had more negative perceptions of the doctor-patient relationship (thought patients were more demanding and aggressive) also had lower satisfaction scores.

Table 5 Influencing factors of doctors' job satisfaction controlling for gender, age and education

| Variables                                   | Overall job satisfaction |      |          |
|---------------------------------------------|--------------------------|------|----------|
|                                             | Mean                     | SD   | p value* |
| <b>Level of hospital</b>                    |                          |      | 0.000    |
| Primary                                     | 3.23                     | 0.06 |          |
| Secondary                                   | 2.83                     | 0.08 |          |
| Tertiary                                    | 2.82                     | 0.09 |          |
| <b>Position rank</b>                        |                          |      | 0.064    |
| Low                                         | 3.12                     | 0.06 |          |
| Middle                                      | 2.91                     | 0.06 |          |
| High                                        | 2.97                     | 0.15 |          |
| <b>Work hours per week</b>                  |                          |      | 0.000    |
| < 50                                        | 3.23                     | 0.06 |          |
| 50 or more                                  | 2.92                     | 0.05 |          |
| <b>Outpatient visits per doctor per day</b> |                          |      | 0.102    |
| < 50                                        | 3.14                     | 0.07 |          |
| 50to 100                                    | 2.99                     | 0.07 |          |
| ≥100                                        | 2.85                     | 0.11 |          |

|                                                                                                                                                  |      |      |       |
|--------------------------------------------------------------------------------------------------------------------------------------------------|------|------|-------|
| Not applicable                                                                                                                                   | 3.12 | 0.08 |       |
| <b>Average visit time per patient (minutes)</b>                                                                                                  |      |      | 0.004 |
| < 10                                                                                                                                             | 2.92 | 0.05 |       |
| 10-20                                                                                                                                            | 3.23 | 0.08 |       |
| ≥20                                                                                                                                              | 2.97 | 0.25 |       |
| Not applicable                                                                                                                                   | 3.22 | 0.09 |       |
| <b>Overtime hours per week</b>                                                                                                                   |      |      | 0.020 |
| < 10                                                                                                                                             | 3.15 | 0.05 |       |
| 10 to 30                                                                                                                                         | 2.95 | 0.06 |       |
| ≥ 30                                                                                                                                             | 2.83 | 0.13 |       |
| <b>On-call duties</b>                                                                                                                            |      |      | 0.001 |
| Yes                                                                                                                                              | 2.94 | 0.05 |       |
| No                                                                                                                                               | 3.26 | 0.08 |       |
| <b>Monthly salary</b>                                                                                                                            |      |      | 0.004 |
| < 1,000 RMB                                                                                                                                      | 2.72 | 0.12 |       |
| 1,000-3,000 RMB                                                                                                                                  | 3.05 | 0.04 |       |
| ≥ 3,000 RMB                                                                                                                                      | 3.24 | 0.10 |       |
| <b>Patients' help seeking behaviours and aggression</b>                                                                                          |      |      |       |
| Patients often go to higher level hospitals (e.g. tertiary hospitals) with simple complaints which could be dealt with at a lower level hospital |      |      | 0.718 |
| Disagree                                                                                                                                         | 3.07 | 0.10 |       |
| Agree                                                                                                                                            | 3.04 | 0.04 |       |
| Sometimes patients just want to get drugs and tests rather than really seeking medical advice from doctors                                       |      |      | 0.040 |
| Disagree                                                                                                                                         | 3.22 | 0.09 |       |
| Agree                                                                                                                                            | 3.01 | 0.04 |       |
| Nowadays patients are better informed about their own medical conditions so that sometimes they demand specific treatments from doctors          |      |      | 0.586 |
| Disagree                                                                                                                                         | 2.99 | 0.11 |       |
| Agree                                                                                                                                            | 3.05 | 0.04 |       |
| Patients are becoming more aggressive in their demands                                                                                           |      |      | 0.008 |
| Disagree                                                                                                                                         | 3.22 | 0.08 |       |
| Agree                                                                                                                                            | 2.98 | 0.04 |       |
| Patients are becoming more likely to sue them even when doctors are trying to do their best                                                      |      |      | 0.532 |
| Disagree                                                                                                                                         | 3.12 | 0.13 |       |
| Agree                                                                                                                                            | 3.04 | 0.04 |       |
| The number of complaints by patients has increased in recent years                                                                               |      |      | 0.052 |
| Disagree                                                                                                                                         | 3.19 | 0.09 |       |
| Agree                                                                                                                                            | 3.00 | 0.04 |       |
| Violence against doctors by their own patients is increasing                                                                                     |      |      | 0.063 |

|          |      |      |
|----------|------|------|
| Disagree | 3.27 | 0.13 |
| Agree    | 3.02 | 0.04 |

\*p values for Analysis of Covariance (ANCOVA) controlling gender, age and education

Finally, 88% (177) of the doctors said they would not want their children to be doctors. Of those 125 who provided a reason, 42 (34%) said poor pay, 22 (18%) said high pressure from work, and 21 (17%) said it was a high-risk profession. Eleven (9%) expressed concerns about personal insecurity or patient violence and conflicts, 11 (9%) cited the poor doctor patient relationship, and 17 (14%) stated low status and social recognition.

## DISCUSSION

This study provides some insights into the reasons for the low morale in the medical profession in China. Given perceived low status, high perceived risk of violence and increasing litigation, it is perhaps not surprising that job satisfaction is low and that the overwhelming majority of our sample (88%) do not want their children to be doctors. Concerns for the future of the medical profession, and threats to the health system are being voiced quite openly even by senior Chinese authorities.<sup>31</sup>

Our findings highlight the causes of low job satisfaction among doctors. They also show that despite being the best qualified, and having the highest status and the highest income, doctors at the provincial hospital were the most dissatisfied group, followed by county hospital doctors with primary care doctors the most satisfied. The causes of dissatisfaction fall into three main areas: low income, heavy workload and patient aggression. We will discuss these three factors and their policy implications.

## Income

Low income is a major grievance, mirroring findings in previous studies.<sup>28 32</sup> Even at provincial level, 80% earned an annual salary of 36,000 RMB or less. Among senior doctors 35% earned more than this. This compared to the average annual income of 34,550 RMB in urban Zhejiang in 2012.<sup>33</sup> While bonuses increase this considerably for some doctors, the overall income is still not regarded by most as sufficient compensation for the long hours, and the risks incurred.

To better remunerate doctors of course demands more resources, but government investment in health remains insufficient. Total health expenditure remained under 5% of GDP before the health reforms in 2009 and saw a slight increase to 5.36% in 2012, compared to a GDP growth of 9.3% in 2011 and 7.8% in 2012.<sup>34 35</sup> This compares with total health spending of around 10% of GDP in UK, Germany, France, Norway, Canada, and Japan.<sup>36</sup> Government subsidy into these so-called public health facilities, accounts for less than 10% of higher-level hospital revenue and 40% of community health centre revenue.<sup>37 38</sup>

Fees for basic medical services, including doctors' consultation, nursing services and surgical procedures, have been kept low ostensibly in order to ensure access to basic care for all.<sup>39</sup> For example in Beijing<sup>40</sup>, a doctor consultation fee in an outpatient department is 2.5 RMB at a community health centre and 4 RMB at a tertiary hospital. The staff costs (surgeons, nurses, anaesthetists) for an appendectomy are 150 RMB. These low costs are blamed in medical circles for the undervaluing medical expertise.<sup>41</sup> Because these charges are kept low, facilities operate a market system, making profits from prescribing drugs and tests. The health reforms were meant to

1  
2  
3 address the problem of perverse incentives, partly through the introduction of the zero  
4 mark-up essential drug policy in 2009. The government started the policy in primary  
5 care level and it is now being rolled-out in higher-level hospitals. With no mark-up  
6 from drugs now possible, the basic salary for the majority of doctors remains low.<sup>10</sup> A  
7 series of experimental initiatives aiming to augment doctors' income are being  
8 launched, such as pay-for-performance and raising prices of services, including  
9 consultation fees and procedures. But this may not fill the gap and doctors' income  
10 remains low. Some doctors are finding other ways to complement income. For  
11 example a shift is being seen towards prescribing more Traditional Chinese Medicine.  
12  
13

14  
15  
16  
17  
18  
19  
20  
21  
22  
23  
24 Appropriate measures to address effort-reward imbalance must be taken. First,  
25 increasing government funding to increase doctors' salary can help to attract and  
26 retain good doctors. Second, increasing charges for healthcare may be useful to  
27 increase hospital revenue, to reflect the value of doctors' expertise and to improve  
28 their self-value and morale. This increase should be covered by governmental  
29 insurance schemes. Third, involving doctors in proper evaluation and modifications of  
30 essential drug list policy is necessary, especially in deciding which drugs are on the  
31 list. There are known to be grievances about the content of the list and doctors want  
32 more autonomy in this regard.<sup>9</sup> Also, it is important to note the socioeconomic  
33 disparities across China. It is extremely difficult to prescribe a national strategy, and  
34 exploration of local policies tailored to local social-economic conditions is warranted.  
35  
36  
37  
38  
39  
40  
41  
42  
43  
44  
45  
46  
47  
48

## 49 **Workload**

50  
51  
52  
53 Long working hours appear to be a major contributor to dissatisfaction especially at  
54 provincial and county hospitals. Here the huge volume of outpatients makes it  
55  
56

1  
2  
3 difficult to spend sufficient time with patients, affecting quality of care and the  
4 doctor-patient relationship. With no gatekeeping systems in primary care, many  
5 patients bypass lower levels to go to where they think they will get the best care, that  
6 is, provincial level hospitals. Inappropriate use of higher level care was commented  
7 on by 84% of our respondents. The health reform measures taken to strengthen  
8 primary care were partly to address this problem of massive overutilization of  
9 secondary and tertiary facilities for mostly minor conditions. But the reforms have  
10 probably made no difference.<sup>9</sup> This is because improvements in health insurance  
11 re-imburement have improved access, especially to higher-level facilities. Around  
12 96% of the population now have health insurance.<sup>42</sup> The outpatient throughput from  
13 2009 to 2012 increased by 50% from 303 million to 455 million.<sup>43</sup>

14  
15  
16  
17  
18  
19  
20  
21  
22  
23  
24  
25  
26  
27  
28 With 46% of all out-patient consultations occurring at county level and above in  
29 2012<sup>44</sup>, the sheer volume of out-patient visits necessitates a very short consultation,  
30 inevitably jeopardising the quality of care. The health reforms have failed to  
31 discourage patients from inappropriately using higher-level care for minor conditions  
32 and this was a major goal of the reforms.

33  
34  
35  
36  
37  
38  
39  
40 To tackle this, the primary care system needs to be further strengthened with the  
41 addition of a gate-keeping role. As we found in our study, primary care doctors have  
42 much lower educational attainment, and this may contribute to the long standing  
43 mistrust among the public. It has been 15 years since the introduction of community  
44 health services as a new primary health care model in urban areas. Despite the  
45 increasing government support, the general public still lack trust in these urban  
46 primary care physicians.<sup>45</sup> The medical education curriculum needs to include more

1  
2  
3 primary care and thus attract more well-qualified doctors into primary care. This  
4  
5 would help to reduce patient flow to high level hospitals, and be far more  
6  
7 cost-effective.  
8  
9

### 10 11 **Patient aggression**

12  
13  
14 Patients' aggressive demands and violence are having a serious impact on doctors' job  
15  
16 satisfaction.<sup>11 46</sup> The situation is compounded by the fact that many of these violent  
17  
18 events take place not only with impunity of the legal authorities, but also with the  
19  
20 tolerance of the general public. In addition, while many receive scant media publicity,  
21  
22 the internet spreads news of these events rapidly and widely. This has bred fears and  
23  
24 insecurity, contributing to low morale in the profession.<sup>12</sup>  
25  
26  
27

28  
29 The causes of this patient aggression are complex. First, perverse incentives and  
30  
31 doctors' profit seeking behaviours have compromised quality of care, and led to  
32  
33 erosion of professional ethics and higher medical costs.<sup>47</sup> Certain areas of the media  
34  
35 have taken to criticising doctors for their "irresponsible and wrong" advice, and  
36  
37 occasional cases of extremely high medical expenses, which make patients feel  
38  
39 exploited.<sup>48</sup> In addition, patients are better informed about medical problems due to  
40  
41 increasingly accessible health information, leading them to be more demanding.  
42  
43  
44

45  
46 Second, in a commoditized health care system, despite high coverage of medical  
47  
48 insurance, patients are still paying a large portion of their medical expenses  
49  
50 out-of-pocket.<sup>37</sup> Together with long waiting times and short consultation times, poor  
51  
52 communication between doctors and patients can easily trigger tension between the  
53  
54 two parties when doctors fail to meet patients' high expectations. Third, as doctors are  
55  
56  
57  
58  
59  
60



1  
2  
3 the ones who dictate patient care, they are an easy target for patients' complaints and  
4  
5 frustration.  
6  
7

8  
9 Measures to prevent patient aggression against doctors are necessary. t. National  
10  
11 measures to strengthen hospital security and criminalize any acts causing hospital  
12  
13 disturbance were taken<sup>49</sup> soon after a doctor was killed by a 17 year-old patient in  
14  
15 2012. But these have been poorly enforced and critics argue that this does not solve  
16  
17 the underlying systemic issues. More radical solutions are needed to prevent violence  
18  
19 in health facilities. Policies of 'zero tolerance' towards violence in healthcare sectors  
20  
21 are recommended by the most influential medical associations in China.<sup>50</sup> Education  
22  
23 programs assisting doctors to prevent and manage patient violence may also be  
24  
25 beneficial.<sup>51</sup> An emphasis on doctor-patient communication skills in medical school  
26  
27 syllabus may help improve the doctor-patient relationship, and reduce patient  
28  
29 aggression.<sup>52</sup>  
30  
31  
32  
33

### 34 **Limitations**

35  
36  
37 The study has some limitations. First, we sampled only four cities and counties in the  
38  
39 province and only one provincial hospital. So the generalizability of the results is  
40  
41 questionable. The sample size was relatively small. However, we did sample across  
42  
43 three levels of health institutions in four places with different economic levels.  
44  
45  
46 Second, as there are almost no studies on this topic, comparisons could not be made.  
47  
48  
49 But as a very first study comparing job satisfaction at three levels of facility and  
50  
51 exploring associated systemic factors, we have provided a starting point for further  
52  
53 research into exploring related issues in China.  
54  
55  
56  
57  
58  
59  
60

## CONCLUSION

Doctors in Zhejiang province, China have low job satisfaction overall. Measures must be taken to address this in order to prevent a serious human resource crisis in the profession. Urgent measures must include reduction of doctors' workload, especially at provincial hospitals, increase in doctors' salary, and more punitive measures against individuals who commit violent acts against doctors.

## Acknowledgements

The authors gratefully acknowledge Professor Yu Hai and Professor Du Ya Ping, Yu Di Di from School of Medicine, Zhejiang University, Mao Li Nan from Health Bureau of Zhejiang province, Zhou Peng Cheng from Xiangya Hospital Central South University for their help during questionnaire development and data collection, and Professor Lam Tai Pong from the University of Hong Kong for his kind support during manuscript preparation.

## Authors' contributions

TH and DW designed the study and the questionnaire. DW carried out the survey. KFL and YW performed the statistical analysis. DW, TH and YW interpreted the analysis. DW and TH drafted the manuscript. All authors read and approved the final manuscript.

## Funding

This research received no specific grant from any funding agency in the public, commercial or not-for-profit sectors

### Competing interests

The authors declare that they have no competing interests.

### Ethical approvals

The study is a student research project that has received ethical approval from the UCL Research Ethics Committee.

### Data sharing statement

No additional data are available.

### REFERENCES

1. Li D, Yin W, Zhang X, et al. Investigation on turnover intention of medical staff in public hospitals and research of early-warning system's construction. *Chinese Journal of Hospital Administration* 2010;**26**(03):218-21.
2. National Health and Family Planning Commission PRC. *Research on relationship between Yi and Huan in China, 2008*: Center for Health Statistics and Information 2008:P106.
3. Wang ZG. *Worrying conditions of doctors' practising environment: 78% of the doctors do not want their children to be doctors 2013*. [http://news.china.com.cn/2013-10/27/content\\_30414901.htm](http://news.china.com.cn/2013-10/27/content_30414901.htm) (accessed 3 Mar 2014).
4. Shanghai Jiao Tong University. *Announcement of results of changing majors for students admitted in 2013*. <http://www.jwc.sjtu.edu.cn/web/sjtu/198015-198000004584.htm> (accessed 27 May 2014).
5. Flaherty JH, Liu ML, Ding L, et al. China: the aging giant. *J Am Geriatr Soc* 2007;**55**(8):1295-300.
6. CDC US. *U.S. CDC IN CHINA: 2010-2011 Annual Report Healthy People in a Health China*, 2013.

- 1  
2  
3 7. Song K, Scott A, Sivey P, et al. Improving Chinese primary care providers'  
4 recruitment and retention: a discrete choice experiment. *Health Policy Plan* 2013.  
5  
6
- 7 8. China Daily. *WeChat poll revealed "90% of participants do not want children to be*  
8 *doctors: high pressure and intense doctor-patient conflicts are main reasons"*.  
9 [http://www.chinadaily.com.cn/micro-reading/dzh/2014-04-23/content\\_11627822.html](http://www.chinadaily.com.cn/micro-reading/dzh/2014-04-23/content_11627822.html)  
10 (accessed 23 May 2014).  
11  
12
- 13 9. Zhou XD, Li L, Hesketh T. Health system reform in rural China: Voices of  
14 healthworkers and service-users. *Soc Sci Med* 2014;**117**:134-41.  
15  
16
- 17 10. Guan XD, Liang HG, Xue YJ, et al. An analysis of China's national essential  
18 medicines policy. *J Public Health Policy* 2011;**32**(3):305-19.  
19  
20
- 21 11. Zhang X, Sleeboom-Faulkner M. Tensions between medical professionals and  
22 patients in mainland China. *Camb Q Healthc Ethics* 2011;**20**(3):458.  
23  
24
- 25 12. Hesketh T, Wu D, Mao LN, et al. Violence against doctors in China. *Br Med J*  
26 2012;**345**.  
27  
28
- 29 13. Wang ZG. *Yi Nao incidents increased by 7000 over last five years: illegal gangs*  
30 *made huge profits 2012*.  
31 [http://www.china.com.cn/news/2012-05/03/content\\_25287333\\_2.htm](http://www.china.com.cn/news/2012-05/03/content_25287333_2.htm) (accessed 23 Jul  
32 2014).  
33  
34
- 35 14. Xiong C. *Medical malpractice and medical disputes*. Chinese Hospital Association  
36 Guide 2006.  
37  
38
- 39 15. Wu SY, Zhu W, Li HY, et al. Workplace violence and influencing factors among  
40 medical professionals in China. *Am J Ind Med* 2012;**55**(11):1000-08.  
41  
42
- 43 16. Ding Xiang Yuan. *Chinese Hospital Association: violence against doctors gets*  
44 *worse*. <http://vote.dxy.cn/report/dxy/id/57914> (accessed 28 Feb 2014).  
45  
46  
47
- 48 17. BMA. *Violence at work: the experience of UK doctors*: Health Policy and  
49 Economic Research Unit, British Medical Association, 2003.  
50  
51
- 52 18. Alghwaiz WM, Alghanim SA. Violence exposure among health care professionals  
53 in Saudi public hospitals. A preliminary investigation. *Saudi Med J* 2012;**33**(1):76-82.  
54  
55  
56

- 1  
2  
3 19. Behnam M, Tillotson RD, Davis SM, et al. Violence in the emergency  
4 department: a national survey of emergency medicine residents and attending  
5 physicians. *J Emerg Med* 2011;**40**(5):565-79.  
6  
7  
8 20. Forrest LE, Herath PM, McRae IS, et al. A national survey of general  
9 practitioners' experiences of patient-initiated aggression in Australia. *Med J Aus*  
10 2011;**194**(11):605-08.  
11  
12  
13 21. Joa TS, Morken T. Violence towards personnel in out-of-hours primary care: a  
14 cross-sectional study. *Scand J Prim Health Care* 2012;**30**(1):55-60.  
15  
16  
17 22. Kowalenko T, Walters BL, Khare RK, et al. Workplace violence: a survey of  
18 emergency physicians in the state of Michigan. *Ann Emerg Med* 2005;**46**(2):142-47.  
19  
20  
21 23. Magnavita N, Heponiemi T. Violence towards health care workers in a Public  
22 Health Care Facility in Italy: a repeated cross-sectional study. *BMC Health Serv Res*  
23 2012;**12**(1):108.  
24  
25  
26 24. Mirza NM, Amjad AI, Bhatti ABH, et al. Violence and abuse faced by junior  
27 physicians in the emergency department from patients and their caretakers: a  
28 nationwide study from Pakistan. *J Emerg Med* 2012;**42**(6):727-33.  
29  
30  
31 25. Saeki K, Okamoto N, Tomioka K, et al. Work-related aggression and violence  
32 committed by patients and its psychological influence on doctors. *J Occup Health*  
33 2011;**53**(5):356-64.  
34  
35  
36 26. Sibbald B, Bojke C, Gravelle H. National survey of job satisfaction and retirement  
37 intentions among general practitioners in England. *Br Med J* 2003;**326**(7379):22.  
38  
39  
40 27. Liu JA, Wang Q, Lu ZX. Job satisfaction and its modeling among township health  
41 center employees: a quantitative study in poor rural China. *BMC Health Serv Res*  
42 2010;**10**(1):115.  
43  
44  
45 28. Shi L, Song K, Rane S, et al. Factors associated with job satisfaction by Chinese  
46 primary care providers. *Prim Health Care Res Dev* 2014;**15**(01):46-57.  
47  
48  
49 29. Thakur M. Job satisfaction in banking: A study of private and public sector banks.  
50 *The IUP Journal of Bank Management* 2007;**6**(4):60-68.  
51  
52  
53  
54  
55  
56  
57  
58  
59  
60

- 1  
2  
3 30. Buciuniene I, Blazeviene A, Bliudziute E. Health care reform and job  
4 satisfaction of primary health care physicians in Lithuania. *BMC Fam Pract*  
5 2005;**6**(1):10.  
6  
7  
8 31. Ren Min Wang PRC. *Liao Xin Bo: Improve doctors' dignity. Secondary Liao Xin*  
9 *Bo: Improve doctors' dignity.*  
10 <http://www.people.com.cn/n/2014/0213/c347759-24348138.html> (accessed 23 May  
11 2014).  
12  
13  
14 32. Lim M-K, Yang H, Zhang T, et al. China's evolving health care market: how  
15 doctors feel and what they think. *Health Policy* 2004;**69**(3):329-37.  
16  
17  
18 33. Zhejiang Provincial Bureau of Statistics. *Statistical report on national economy*  
19 *and social development in Zhejiang Province, 2012.*  
20 [http://tjj.zj.gov.cn/tjgb/gmjshfzgb/201302/t20130208\\_122162.html](http://tjj.zj.gov.cn/tjgb/gmjshfzgb/201302/t20130208_122162.html) (accessed 21 Feb  
21 2014).  
22  
23  
24 34. The World Bank. *World Development Indicators: GDP growth (annual %).*  
25 <http://data.worldbank.org/indicator/NY.GDP.MKTP.KD.ZG> (accessed 7 Apr 2014).  
26  
27  
28  
29 35. National Health and Family Planning Commission PRC. *Health statistics in*  
30 *China, 2012.*  
31 <http://www.moh.gov.cn/zwgkzt/ptjty/201206/55044/files/3ca7756121334b7a870a25a>  
32 [c79988f23.pdf](http://www.moh.gov.cn/zwgkzt/ptjty/201206/55044/files/3ca7756121334b7a870a25ac79988f23.pdf) (accessed 7 Apr 2014).  
33  
34  
35 36. The World Bank. *Health expenditure, total (% of GDP) 2012.*  
36 <http://data.worldbank.org/indicator/SH.XPD.TOTL.ZS> (accessed 24 May 2014).  
37  
38  
39 37. National Health and Family Planning Commission PRC. *China Health Statistics*  
40 *Yearbook 2013.*  
41 <http://www.nhfpc.gov.cn/htmlfiles/zwgkzt/ptjnj/year2013/index2013.html> (accessed  
42 23 May 2014).  
43  
44  
45 38. Ren YJ, Ji QY. Analysis of salary distribution system in public hospitals. *Journal*  
46 *of Shanghai Jiaotong University (Medical Science)* 2013;**33**(6).  
47  
48  
49 39. Yip W, Hsiao WC. The Chinese health system at a crossroads. *Health Aff*  
50 2008;**27**(2):460-68.  
51  
52  
53  
54  
55  
56  
57  
58  
59  
60

- 1  
2  
3 40. Beijing Municipal Commission of Development and Reform. *Prices of medical*  
4 *services in Beijing*. <http://service2.bjpc.gov.cn/bjpc/mediprice/MedicalService1.jsp>  
5 (accessed 28 Apr 2014).  
6  
7  
8 41. Wang XH. *Zhong Nan Shan: Chinese doctors survive by selling drugs and the*  
9 *value of their expertise is not being reflected*.  
10 [http://news.xinhuanet.com/health/2014-03/06/c\\_126226620.htm](http://news.xinhuanet.com/health/2014-03/06/c_126226620.htm) (accessed 24 May  
11 2014).  
12  
13  
14 42. Meng Q, Xu L, Zhang Y, et al. Trends in access to health services and financial  
15 protection in China between 2003 and 2011: a cross-sectional study. *Lancet*  
16 2012;**379**(9818):805-14.  
17  
18  
19 43. Health Bureau of Zhejiang Province. *Health statistics in Zhejiang Province*.  
20 <http://www.zjwst.gov.cn/col/col320/index.html###> (accessed 31 Mar 2014 ).  
21  
22  
23 44. Health Bureau of Zhejiang Province. *Outpatient services in health facilities in*  
24 *Zhejiang Province, 2012*.  
25 [http://www.zjwst.gov.cn/art/2013/4/15/art\\_320\\_227356.html](http://www.zjwst.gov.cn/art/2013/4/15/art_320_227356.html) (accessed 31 Mar 2014  
26 ).  
27  
28  
29 45. Du J, Lu X, Wang Y, et al. Mutual referral: a survey of GPs in Beijing. *Fam Pract*  
30 2012;**29**(4):441-7.  
31  
32  
33 46. Yao Y, Wang W, Wang F, et al. General self-efficacy and the effect of hospital  
34 workplace violence on doctors' stress and job satisfaction in China. *Int J Occup Med*  
35 *Environ Health* 2014;**27**(3):1-11.  
36  
37  
38 47. Yip WC-M, Hsiao W, Meng Q, et al. Realignment of incentives for health-care  
39 providers in China. *Lancet* 2010;**375**(9720):1120-30.  
40  
41  
42 48. Jie YX. *10 doctors calls for apologies from mass media about falsified reports*.  
43 <http://www.yxj.org.cn/news/yijieyaowen/shehuijiaodian/2014052109582936651.htm>  
44 (accessed 23 May 2014 ).  
45  
46  
47 49. National Health and Family Planning Commission PRC. *The directive of*  
48 *maintaining order at medical institutions by Police Department, Ministry of Health*.  
49 <http://wsb.moh.gov.cn/zwgkzt/ptg/201204/54578.shtml> (accessed 11 Feb 2014).  
50  
51  
52 50. CMA. *United call for "Zero tolerance to medical violence" by Chinese Medical*  
53 *Association, Chinese Medical Doctor Association, Chinese Hospital Association and*  
54  
55  
56  
57  
58  
59  
60

1  
2  
3 *Chinese Health Law Society.*  
4 [http://www.cma.org.cn/index/xhdt/20131029/1383026180011\\_1.html](http://www.cma.org.cn/index/xhdt/20131029/1383026180011_1.html) (accessed 11  
5 Feb 2014).  
6  
7

8 51. Zernike W, Sharpe P. Patient aggression in a general hospital setting: do nurses  
9 perceive it to be a problem? *Int J Nurs Pract* 1998;**4**(2):126-33.  
10

11  
12 52. Ong LM, De Haes JC, Hoos AM, et al. Doctor-patient communication: a review  
13 of the literature. *Soc Sci Med* 1995;**40**(7):903-18.  
14  
15  
16  
17  
18  
19  
20  
21  
22  
23  
24  
25  
26  
27  
28  
29  
30  
31  
32  
33  
34  
35  
36  
37  
38  
39  
40  
41  
42  
43  
44  
45  
46  
47  
48  
49  
50  
51  
52  
53  
54  
55  
56  
57  
58  
59  
60



**STROBE 2007 (v4) checklist of items to be included in reports of observational studies in epidemiology\***  
**Checklist for cohort, case-control, and cross-sectional studies (combined)**

| Section/Topic             | Item # | Recommendation                                                                                                                                                                                                                                                                                                                                                                                                                                                         | Reported on page # |
|---------------------------|--------|------------------------------------------------------------------------------------------------------------------------------------------------------------------------------------------------------------------------------------------------------------------------------------------------------------------------------------------------------------------------------------------------------------------------------------------------------------------------|--------------------|
| Title and abstract        | 1      | (a) Indicate the study's design with a commonly used term in the title or the abstract                                                                                                                                                                                                                                                                                                                                                                                 | 1                  |
|                           |        | (b) Provide in the abstract an informative and balanced summary of what was done and what was found                                                                                                                                                                                                                                                                                                                                                                    | 2                  |
| <b>Introduction</b>       |        |                                                                                                                                                                                                                                                                                                                                                                                                                                                                        |                    |
| Background/rationale      | 2      | Explain the scientific background and rationale for the investigation being reported                                                                                                                                                                                                                                                                                                                                                                                   | 4-5                |
| Objectives                | 3      | State specific objectives, including any pre-specified hypotheses                                                                                                                                                                                                                                                                                                                                                                                                      | 6                  |
| <b>Methods</b>            |        |                                                                                                                                                                                                                                                                                                                                                                                                                                                                        |                    |
| Study design              | 4      | Present key elements of study design early in the paper                                                                                                                                                                                                                                                                                                                                                                                                                | 6                  |
| Setting                   | 5      | Describe the setting, locations, and relevant dates, including periods of recruitment, exposure, follow-up, and data collection                                                                                                                                                                                                                                                                                                                                        | 6-7                |
| Participants              | 6      | (a) <i>Cohort study</i> —Give the eligibility criteria, and the sources and methods of selection of participants. Describe methods of follow-up<br><i>Case-control study</i> —Give the eligibility criteria, and the sources and methods of case ascertainment and control selection. Give the rationale for the choice of cases and controls<br><i>Cross-sectional study</i> —Give the eligibility criteria, and the sources and methods of selection of participants | 6-7                |
|                           |        | (b) <i>Cohort study</i> —For matched studies, give matching criteria and number of exposed and unexposed<br><i>Case-control study</i> —For matched studies, give matching criteria and the number of controls per case                                                                                                                                                                                                                                                 | N/A                |
| Variables                 | 7      | Clearly define all outcomes, exposures, predictors, potential confounders, and effect modifiers. Give diagnostic criteria, if applicable                                                                                                                                                                                                                                                                                                                               | 7-8                |
| Data sources/ measurement | 8*     | For each variable of interest, give sources of data and details of methods of assessment (measurement). Describe comparability of assessment methods if there is more than one group                                                                                                                                                                                                                                                                                   | 8                  |
| Bias                      | 9      | Describe any efforts to address potential sources of bias                                                                                                                                                                                                                                                                                                                                                                                                              | N/A                |
| Study size                | 10     | Explain how the study size was arrived at                                                                                                                                                                                                                                                                                                                                                                                                                              | 6-7                |
| Quantitative variables    | 11     | Explain how quantitative variables were handled in the analyses. If applicable, describe which groupings were chosen and why                                                                                                                                                                                                                                                                                                                                           | 8                  |
| Statistical methods       | 12     | (a) Describe all statistical methods, including those used to control for confounding                                                                                                                                                                                                                                                                                                                                                                                  | 8                  |
|                           |        | (b) Describe any methods used to examine subgroups and interactions                                                                                                                                                                                                                                                                                                                                                                                                    | 8                  |
|                           |        | (c) Explain how missing data were addressed                                                                                                                                                                                                                                                                                                                                                                                                                            | N/A                |
|                           |        | (d) <i>Cohort study</i> —If applicable, explain how loss to follow-up was addressed<br><i>Case-control study</i> —If applicable, explain how matching of cases and controls was addressed                                                                                                                                                                                                                                                                              | N/A                |

|                          |     |                                                                                                                                                                                                              |       |
|--------------------------|-----|--------------------------------------------------------------------------------------------------------------------------------------------------------------------------------------------------------------|-------|
|                          |     | <i>Cross-sectional study</i> —If applicable, describe analytical methods taking account of sampling strategy                                                                                                 |       |
|                          |     | (e) Describe any sensitivity analyses                                                                                                                                                                        | N/A   |
| <b>Results</b>           |     |                                                                                                                                                                                                              |       |
| Participants             | 13* | (a) Report numbers of individuals at each stage of study—eg numbers potentially eligible, examined for eligibility, confirmed eligible, included in the study, completing follow-up, and analysed            | 8     |
|                          |     | (b) Give reasons for non-participation at each stage                                                                                                                                                         | N/A   |
|                          |     | (c) Consider use of a flow diagram                                                                                                                                                                           | N/A   |
| Descriptive data         | 14* | (a) Give characteristics of study participants (eg demographic, clinical, social) and information on exposures and potential confounders                                                                     | 8-11  |
|                          |     | (b) Indicate number of participants with missing data for each variable of interest                                                                                                                          | 9-10  |
|                          |     | (c) <i>Cohort study</i> —Summarise follow-up time (eg, average and total amount)                                                                                                                             | N/A   |
| Outcome data             | 15* | <i>Cohort study</i> —Report numbers of outcome events or summary measures over time                                                                                                                          | N/A   |
|                          |     | <i>Case-control study</i> —Report numbers in each exposure category, or summary measures of exposure                                                                                                         | N/A   |
|                          |     | <i>Cross-sectional study</i> —Report numbers of outcome events or summary measures                                                                                                                           | 13-14 |
| Main results             | 16  | (a) Give unadjusted estimates and, if applicable, confounder-adjusted estimates and their precision (eg, 95% confidence interval). Make clear which confounders were adjusted for and why they were included | 8-19  |
|                          |     | (b) Report category boundaries when continuous variables were categorized                                                                                                                                    | N/A   |
|                          |     | (c) If relevant, consider translating estimates of relative risk into absolute risk for a meaningful time period                                                                                             | N/A   |
| Other analyses           | 17  | Report other analyses done—eg analyses of subgroups and interactions, and sensitivity analyses                                                                                                               | 17-18 |
| <b>Discussion</b>        |     |                                                                                                                                                                                                              |       |
| Key results              | 18  | Summarise key results with reference to study objectives                                                                                                                                                     | 19    |
| Limitations              | 19  | Discuss limitations of the study, taking into account sources of potential bias or imprecision. Discuss both direction and magnitude of any potential bias                                                   | 24    |
| Interpretation           | 20  | Give a cautious overall interpretation of results considering objectives, limitations, multiplicity of analyses, results from similar studies, and other relevant evidence                                   | N/A   |
| Generalisability         | 21  | Discuss the generalisability (external validity) of the study results                                                                                                                                        | 24    |
| <b>Other information</b> |     |                                                                                                                                                                                                              |       |
| Funding                  | 22  | Give the source of funding and the role of the funders for the present study and, if applicable, for the original study on which the present article is based                                                | N/A   |

\*Give information separately for cases and controls in case-control studies and, if applicable, for exposed and unexposed groups in cohort and cross-sectional studies.

**Note:** An Explanation and Elaboration article discusses each checklist item and gives methodological background and published examples of transparent reporting. The STROBE checklist is best used in conjunction with this article (freely available on the Web sites of PLoS Medicine at <http://www.plosmedicine.org/>, Annals of Internal Medicine at <http://www.annals.org/>, and Epidemiology at <http://www.epidem.com/>). Information on the STROBE Initiative is available at [www.strobe-statement.org](http://www.strobe-statement.org).

# BMJ Open

## Health system reforms, violence against doctors and job satisfaction in the medical profession: a cross-sectional survey in Zhejiang Province, Eastern China

|                                 |                                                                                                                                                                                                                                                                                                                                                     |
|---------------------------------|-----------------------------------------------------------------------------------------------------------------------------------------------------------------------------------------------------------------------------------------------------------------------------------------------------------------------------------------------------|
| Journal:                        | <i>BMJ Open</i>                                                                                                                                                                                                                                                                                                                                     |
| Manuscript ID:                  | bmjopen-2014-006431.R1                                                                                                                                                                                                                                                                                                                              |
| Article Type:                   | Research                                                                                                                                                                                                                                                                                                                                            |
| Date Submitted by the Author:   | 17-Nov-2014                                                                                                                                                                                                                                                                                                                                         |
| Complete List of Authors:       | Wu, Dan; The University of Hong Kong, Department of Family Medicine and Primary Care<br>Wang, Yun; The University of Hong Kong, Centre for Suicide Research and Prevention<br>Lam, Kwok Fai; The University of Hong Kong, Department of Statistics and Actuarial Science<br>Hesketh, Therese; University College London, Institute of Global Health |
| <b>Primary Subject Heading</b>: | Health policy                                                                                                                                                                                                                                                                                                                                       |
| Secondary Subject Heading:      | Health policy, Health services research                                                                                                                                                                                                                                                                                                             |
| Keywords:                       | health reform, China, patient aggression, doctors, job satisfaction                                                                                                                                                                                                                                                                                 |
|                                 |                                                                                                                                                                                                                                                                                                                                                     |

SCHOLARONE™  
Manuscripts

1  
2  
3 **Health system reforms, violence against doctors and job satisfaction in the**  
4 **medical profession: a cross-sectional survey in Zhejiang Province, Eastern China**  
5  
6  
7

8 **Dan WU<sup>1</sup>, Yun WANG<sup>2</sup>, Kwok Fai LAM<sup>3</sup>, Therese HESKETH<sup>4,\*</sup>**  
9

10  
11 <sup>1</sup> Department of Family Medicine and Primary Care, Faculty of Medicine, The  
12 University of Hong Kong, Hong Kong  
13

14  
15  
16 <sup>2</sup> Centre for Suicide Research and Prevention, Faculty of Social Sciences, The  
17 University of Hong Kong, Hong Kong  
18

19  
20  
21 <sup>3</sup> Department of Statistics and Actuarial Science, Faculty of Science, The University  
22 of Hong Kong, Hong Kong  
23

24  
25  
26 <sup>4</sup> UCL Institute of Global Health, University College London  
27

28  
29 \*Correspondence to Professor Therese Hesketh, UCL Institute for Global Health, 30  
31 Guilford Street, London WC1N 1EH, UK; Email: [t.hesketh@ich.ucl.ac.uk](mailto:t.hesketh@ich.ucl.ac.uk);  
32

33  
34 Tel: +207-905-2253  
35

36  
37 **Keywords:** health reform, China, patient aggression, doctors, job satisfaction,  
38

39 Word count: 4059  
40

41 Number of tables and/or figures: 5  
42

43 Number of references: 53  
44

45 Checklist used for structuring the article: STROBE  
46  
47  
48  
49  
50  
51  
52  
53  
54  
55  
56  
57  
58  
59  
60

## Abstract

**Objective:** To explore the factors influencing doctors' job satisfaction and morale in China, in the context of the ongoing health system reforms and the deteriorating doctor-patient relationship

**Design:** Cross-sectional survey using self-completion questionnaires.

**Study setting:** The survey was conducted from March to May 2012 among doctors at provincial, county and primary care levels, in Zhejiang Province, China.

**Results:** The questionnaire was completed by 202 doctors. Factors which contributed most to low job satisfaction were low income and long working hours. Provincial level doctors were most dissatisfied while primary care doctors were the least dissatisfied. Three percent of doctors at high-level hospitals and 27% of those in primary care were satisfied with the salary. Only 7% at high-level hospitals were satisfied with work hours, compared to 43% in primary care. Less than 10% at high levels were satisfied with amount of paid vacation time (3%) and paid sick leave (5%), compared with 38% and 41% respectively in primary care.

Overall, 87% reported that patients were more likely to sue and that patient violence against doctors was increasing. Only 4.5% wanted their children to be doctors. Of those 125 who provided a reason, 34% said poor pay, 17% said it was a high-risk profession, and 9% expressed concerns about personal insecurity or patient violence.

**Conclusions:** Doctors have low job satisfaction overall. Recruitment and retention of doctors have become major challenges for the Chinese health system. Measures must be taken to address this, in order to ensure recruitment and retention of doctors in the

1  
2  
3 future. These measures must include reduction of doctors' workload especially at  
4  
5 provincial hospitals, increase in doctors' salary and more effective measures to tackle  
6  
7 patient violence against doctors.  
8  
9

### 10 11 12 13 14 **Strengths and limitations of this study**

- 15  
16  
17 • Our study is one of the first to investigate doctors' job satisfaction in China,  
18 since the instigation of the health reforms in 2009.
- 19  
20  
21 • We compared doctors' job satisfaction across three levels of health facility and  
22 explored associated systemic factors.
- 23  
24  
25 • Our study documents for the first time that increasing patient violence is a major  
26 contributor to doctors' low morale
- 27  
28  
29 • The generalizability of the study is constrained by the limited number of  
30 participating health facilities and the small sample size.  
31  
32  
33  
34  
35  
36  
37  
38  
39  
40  
41  
42  
43  
44  
45  
46  
47  
48  
49  
50  
51  
52  
53  
54  
55  
56  
57  
58  
59  
60

## INTRODUCTION

The Chinese medical profession is facing serious problems with recruitment and retention of doctors. Evidence from a number of sources illustrates low levels of morale in the profession. In a study of 933 doctors in 29 public hospitals in Shandong province, 49% said they intended to leave the profession.<sup>1</sup> Other studies have shown that only 24% of doctors would choose the profession if they had a second chance<sup>2</sup> and 78% would not want their own children to be doctors.<sup>3</sup> At Shanghai Jiao Tong University, which is among the top five in the country, 10% of the second year medical students transferred to other majors in 2013.<sup>4</sup> These worrying manifestations of discontent come at a time when more doctors are needed, given the pressures of an ageing population<sup>5</sup> and a growing non-communicable diseases burden.<sup>6</sup> Recruitment and retention of doctors have become major challenges for the health system in China.<sup>7</sup>

There is evidence that this situation is worsening<sup>8</sup>, so urgent measures are needed to reverse this trend. Clearly, such measures need to include addressing the underlying causes of this discontent. The aim of this study was to explore these underlying causes through surveying the views of doctors working at three levels of the health system: tertiary, secondary and primary care. Primary level facilities are supposed to provide preventive and basic medical services, while secondary and tertiary hospitals provide specialized care. The study was conducted in 2012, three years after the inception of major health system reforms, aiming to provide universal healthcare by 2020 with a focus on strengthening primary care. The reforms have also had impacts on doctors' working conditions: changes to health insurance have made healthcare more affordable at all levels, resulting in increased workload for doctors, especially at

1  
2  
3 secondary and tertiary level hospitals, even for minor illness. The introduction of an  
4 essential drug list for primary care, which aims to reduce perverse incentives for  
5 overprescribing to forbid profit on drugs, has reduced doctors' autonomy and reduced  
6 their income.<sup>9</sup> This loss of income from the mark-up in primary care has been  
7 replaced with a fixed salary and in some places a performance-based bonus, which in  
8 most cases is lower than previous earnings.<sup>10</sup>

9  
10  
11  
12  
13  
14  
15  
16  
17 Another important contributor to morale is a recent deterioration in the doctor-patient  
18 relationship.<sup>11</sup> The most extreme manifestation of this is a rise in levels of violence  
19 against health workers, along with damage and disturbance to health facilities. In  
20 China, this phenomenon is known as Yi Nao, which translates as (medical or hospital  
21 disturbance). This is usually caused by patients or their relatives as a reaction to what  
22 may be perceived, rightly or wrongly, as failures or mistakes by hospital staff.  
23 Sometimes the situation escalates with aggrieved patients and relatives hiring criminal  
24 gangs, prepared to go to extreme lengths, to threaten the hospital to provide  
25 compensation.<sup>12</sup> Yi Nao events are not rare. The Ministry of Health reported that the  
26 number of "major disturbances" involving physical violence nearly doubled from  
27 9,831 in 2006 to 17,243 in 2010.<sup>13</sup> In a 2006 study of 270 hospitals, over 70%  
28 reported that they had experienced Yi Nao incidents.<sup>14</sup> A study of 12 hospitals in 2009  
29 revealed that, of 2,464 medical professionals, 50% experienced workplace violence  
30 over the last 12 months, with 20% encountering physical abuse at least once.<sup>15</sup> A 2012  
31 survey conducted by the Chinese Hospital Association in 316 public hospitals in 30  
32 provinces revealed that the proportion of hospitals, which reported incidents of  
33 physical violence causing harm, had increased from 48% in 2008 to 64% in 2012. Of  
34 these, 8% of hospitals reported six or more incidents of physical violence every  
35  
36  
37  
38  
39  
40  
41  
42  
43  
44  
45  
46  
47  
48  
49  
50  
51  
52  
53  
54  
55  
56  
57  
58  
59  
60



1  
2  
3 year.<sup>16</sup> Violence against health personnel is not unique to China. It has been reported  
4  
5 from many other countries, including countries as diverse as the UK, US, Italy, Saudi  
6  
7 Arabia, Pakistan and Japan.<sup>17-25</sup> And many other countries are facing challenges with  
8  
9 the recruitment and retention of doctors.<sup>26</sup> Therefore, lessons from the Chinese  
10  
11 experience are relevant for other countries.  
12

13  
14  
15 The overall objectives of this study were: 1) to explore the factors influencing  
16  
17 doctors' job satisfaction and morale, with a special focus on the impacts of health  
18  
19 system reforms and the deteriorating doctor-patient relationship, and 2) to compare  
20  
21 doctors working at the three levels in the Chinese health system.  
22  
23

## 24 25 **METHODS**

### 26 27 28 **Sampling and data collection**

29  
30  
31 This cross-sectional survey was conducted from March to May 2012 in health  
32  
33 facilities in Zhejiang province, Eastern China. Zhejiang has a population of 55 million  
34  
35 and is ranked fourth in terms of GDP per capita among China's 33 provinces.  
36  
37

38  
39 A multi-stage stratified purposive sampling method was adopted (Table 1). We first  
40  
41 selected four cities or counties which represented high (Hangzhou and Yiwu), middle  
42  
43 (Anji) and low-level (Xianju) economic development in Zhejiang province. In the  
44  
45 second stage 10 health facilities were purposively sampled in the four cities/counties  
46  
47 to represent a range of health facilities: in urban areas a multi-specialism provincial  
48  
49 hospital (tertiary level) in Hangzhou, the main county hospitals (secondary level) in  
50  
51 Anji and Xianju respectively, and two community health centres/township health  
52  
53 centres (providers of primary care in urban and rural areas) in each city/county were  
54  
55  
56  
57  
58  
59  
60

invited to participate (one in Xianju county refused). In total, four community health centres (CHCs) in urban cities and three township health centres (THCs) in rural counties were selected based on their general representativeness in the city/county.

Table 1 Sampling strategy and achieved sample size by area

| Cities   | Income level  | Participating hospitals | Sample size | Total sample size |
|----------|---------------|-------------------------|-------------|-------------------|
| Hangzhou | High-income   | 1 provincial hospital   | 48          | 60                |
|          |               | 2 CHCs <sup>a</sup>     | 12          |                   |
| Yiwu     | High-income   | 2 CHCs                  | 54          | 54                |
| Anji     | Middle-income | 1 county hospital       | 24          | 41                |
|          |               | 2 THCs <sup>b</sup>     | 17          |                   |
| Xianju   | Low-income    | 1 county hospital       | 19          | 47                |
|          |               | 1 THC                   | 28          |                   |
| Total    |               | 10                      |             | 202               |

<sup>a</sup>CHCs: Community Health Centres

<sup>b</sup>THCs: Township Health Centres

At provincial level hospitals and county hospitals participants were internal medical doctors and surgeons, who were present in inpatient wards at the time of the survey.

At CHCs and THCs, primary care physicians present in clinics at the time of the survey were recruited.

Prospective participants were told that the questionnaire was about job satisfaction, that completion was voluntary, and that respondent anonymity and confidentiality would be strictly protected. Ethical approval was obtained from University College London. Local approvals were obtained from Zhejiang Health Bureau and local health authorities.

## Measurement methods

1  
2  
3 We developed the questionnaire based partly on existing questionnaires<sup>27-30</sup> with some  
4 items added and modified to specifically reflect the Chinese setting. Most questions  
5 used a five-point Likert scale ranging from 1 (not satisfied at all or strongly disagree)  
6 to 5 (extremely satisfied or strongly agree). The questionnaire included items about  
7 job satisfaction in general, perceptions about patients' health seeking behaviours and  
8 experience of patient aggression. Reverse scoring was used for questions phrased in  
9 the negative. The questionnaire was piloted, and modifications were made according  
10 to feedback.  
11  
12  
13  
14  
15  
16  
17  
18  
19

### 20 21 22 **Statistical analysis**

23  
24  
25 The data were analysed using IBM SPSS version 21. Comparisons between three  
26 levels of facility were conducted using Chi-square tests. We generated an overall job  
27 satisfaction score by computing the mean of 19 satisfaction items. The satisfaction  
28 score ranges from 1 (the lowest satisfaction) to 5 (the highest satisfaction). A higher  
29 score means higher satisfaction level. Analysis of Covariance (ANCOVA) was  
30 performed to compare satisfaction scores by level of response of associated factors  
31 controlling for gender, age and education.  
32  
33  
34  
35  
36  
37  
38  
39  
40

## 41 42 **RESULTS**

### 43 44 45 **Sample characteristics**

46  
47  
48 Characteristics of the study sample are shown in Table 2. Two hundred and two  
49 doctors completed questionnaires with a response rate of 81%. Forty-eight were from  
50 the provincial hospital, 43 from county hospitals, and 111 from primary care facilities.  
51  
52  
53 The mean age was 35.2 (SD=7.6), and 105 doctors were male, with 85 female. Only  
54  
55  
56  
57  
58  
59  
60

29% of primary care doctors had obtained a five-year formal medical education qualification compared with 93% and 96% at county and provincial level respectively.

Table 2 Characteristics of the sample and basic working conditions by level of hospital n (%)

|                                             | Total<br>N=202 | Level of hospital |                |                    | p value<br>( $\chi^2$ tests) |
|---------------------------------------------|----------------|-------------------|----------------|--------------------|------------------------------|
|                                             |                | CHCs<br>N=111     | County<br>N=43 | Provincial<br>N=48 |                              |
| <b>Age (mean and SD)</b>                    | 35.2(7.6)      | 36.1(8.6)         | 34.2(7.4)      | 34.0(4.1)          | 0.196                        |
| <b>Gender</b>                               |                |                   |                |                    | 0.001                        |
| Male                                        | 105(52.0)      | 45(40.5)          | 33(76.7)       | 27(56.3)           |                              |
| Female                                      | 85(42.1)       | 59(53.2)          | 10(23.3)       | 16(33.3)           |                              |
| Missing                                     | 12(5.9)        | 7(6.3)            | 0              | 5(10.4)            |                              |
| <b>Education level</b>                      |                |                   |                |                    | 0.000                        |
| Post-secondary level or less                | 78(38.6)       | 75(67.6)          | 3(7.0)         | 0(0)               |                              |
| Undergraduate or higher                     | 118(58.4)      | 32(28.8)          | 40(93.0)       | 46(95.8)           |                              |
| Missing                                     | 6(3.0)         | 4(3.6)            | 0              | 2(4.2)             |                              |
| <b>Position rank</b>                        |                |                   |                |                    | 0.001                        |
| Low                                         | 81(40.1)       | 51(45.9)          | 21(48.8)       | 9(18.8)            |                              |
| Middle                                      | 81(40.1)       | 36(32.4)          | 16(37.2)       | 29(60.4)           |                              |
| High                                        | 18(8.9)        | 4(3.6)            | 6(14.0)        | 8(16.7)            |                              |
| Missing                                     | 22(10.9)       | 20(18.0)          | 0              | 2(4.2)             |                              |
| <b>Work hours/week</b>                      |                |                   |                |                    | 0.000                        |
| < 40                                        | 16(8.2)        | 15(13.5)          | 0              | 1(2.1)             |                              |
| 40 to 50                                    | 60(30.6)       | 42(37.8)          | 13(30.2)       | 5(10.4)            |                              |
| 50 to 60                                    | 48(24.5)       | 27(24.3)          | 10(23.3)       | 11(22.9)           |                              |
| ≥ 60                                        | 72(36.7)       | 23(20.7)          | 20(46.5)       | 29(60.4)           |                              |
| Missing                                     | 6(3.0)         | 4(3.6)            | 0              | 2(4.2)             |                              |
| <b>Outpatient visits per doctor per day</b> |                |                   |                |                    | 0.000                        |
| < 50                                        | 67(33.2)       | 45(40.5)          | 17(39.5)       | 5(10.4)            |                              |
| 50 to 100                                   | 58(28.7)       | 34(30.6)          | 13(30.2)       | 11(22.9)           |                              |
| ≥100                                        | 27(13.4)       | 3(2.7)            | 2(4.7)         | 22(45.8)           |                              |
| Not applicable                              | 40(20.8)       | 24(21.6)          | 9(20.9)        | 7(14.6)            |                              |
| Missing                                     | 10(5.0)        | 5(4.5)            | 2(4.7)         | 3(6.3)             |                              |
| <b>Average visit time/patient (minutes)</b> |                |                   |                |                    | 0.001                        |
| ≤ 4                                         | 32(15.8)       | 8(7.2)            | 6(14.0)        | 18(37.5)           |                              |
| 5-9                                         | 83(41.1)       | 46(41.4)          | 21(48.8)       | 16(33.3)           |                              |
| 10-14                                       | 31(15.3)       | 18(16.2)          | 8(18.6)        | 5(10.4)            |                              |
| 15-20                                       | 10(5.0)        | 7(6.3)            | 1(2.3)         | 2(4.2)             |                              |
| ≥20                                         | 5(2.5)         | 4(3.6)            | 1(2.3)         | 0(0)               |                              |
| Not applicable                              | 33(16.3)       | 24(21.6)          | 4(9.3)         | 5(10.4)            |                              |

|                                    |           |          |          |          |       |
|------------------------------------|-----------|----------|----------|----------|-------|
| Missing                            | 8(4.0)    | 4(3.6)   | 2(4.7)   | 2(4.2)   |       |
| <b>Overtime hours per week</b>     |           |          |          |          | 0.000 |
| < 10                               | 103(51.0) | 69(62.2) | 23(53.5) | 11(22.9) |       |
| 10 to 30                           | 74(36.6)  | 35(31.5) | 15(34.9) | 24(50.0) |       |
| ≥ 30                               | 17(8.4)   | 2(1.8)   | 4(9.3)   | 11(22.9) |       |
| Missing                            | 8(4.0)    | 5(4.5)   | 1(2.3)   | 2(4.2)   |       |
| <b>On-call duties</b>              |           |          |          |          | 0.000 |
| Yes                                | 131(64.9) | 53(47.7) | 35(81.4) | 43(89.6) |       |
| No                                 | 61(30.2)  | 52(46.8) | 7(16.3)  | 2(4.2)   |       |
| Missing                            | 10(5.0)   | 6(5.4)   | 1(2.3)   | 3(6.2)   |       |
| <b>Monthly salary</b>              |           |          |          |          | 0.000 |
| < 1,000 RMB                        | 20(10.2)  | 2(1.8)   | 16(37.2) | 2(4.2)   |       |
| 1,000 – 3,000 RMB                  | 146(74.1) | 84(75.7) | 27(62.8) | 35(72.9) |       |
| 3,000 – 5,000 RMB                  | 29(14.7)  | 21(18.9) | 0        | 8(16.7)  |       |
| ≥ 5,000 RMB                        | 2(1.0)    | 1(0.9)   | 0        | 1(2.1)   |       |
| Missing                            | 5(2.5)    | 3(2.7)   | 0        | 2(4.2)   |       |
| <b>Total bonus last year (RMB)</b> |           |          |          |          | 0.000 |
| < 10,000                           | 34(17.4)  | 27(24.3) | 4(9.3)   | 3(6.2)   |       |
| 10,000 – 30,000                    | 106(54.4) | 57(51.4) | 35(81.4) | 14(29.1) |       |
| 30,000 – 50,000                    | 43(22.1)  | 16(14.4) | 4(9.3)   | 23(47.9) |       |
| 50,000 – 100,000                   | 9(4.6)    | 7(6.3)   | 0        | 2(4.2)   |       |
| 100,000 or higher                  | 3(1.5)    | 0        | 0        | 3(6.3)   |       |
| Missing                            | 7(3.5)    | 4(3.6)   | 0        | 3(6.3)   |       |
| <b>The need to do research</b>     |           |          |          |          | 0.000 |
| Yes                                | 88(44.9)  | 30(27.0) | 18(41.9) | 40(83.3) |       |
| No                                 | 108(55.1) | 77(69.3) | 25(58.2) | 6(6.3)   |       |
| Missing                            | 6(3.0)    | 4(3.6)   | 0        | 2(4.2)   |       |

### Workload and pay (Table 2)

Workload varied considerably with level of hospital. Provincial hospital doctors worked the longest hours, 60% routinely worked more than 60 hours per week with 23% working more than 30 hours per week in overtime (additional work hours and on a “forced voluntary” basis largely due to heavy workload). For county level doctors these figures were 47% and 9%, and primary level doctors reported 21% and 2%. Sixty-nine percent of provincial hospital doctors saw over 50 patients in clinic per day with 46% seeing over 100 patients a day. Thirty-five per cent of doctors at secondary level facilities saw over 50 outpatients per day and 33% at the primary level. Not

1  
2  
3 surprisingly, consultation times were reported to be very short. Nearly 38% of  
4 provincial hospital doctors spent 4 minutes or less on average for each outpatient.  
5  
6 These compared to 14% in county hospitals, and 7% in primary care. Ninety per cent  
7  
8 of doctors at the provincial hospital reported that they did on-call duties (which  
9  
10 usually involved being available on site overnight to deal with referrals and problems),  
11  
12 followed by the county level (81%) and primary level (48%). Eighty-seven percent of  
13  
14 provincial hospital doctors were required to do research in order to be eligible for  
15  
16 promotion. This compared to 42% and 28% in county level and primary care  
17  
18 respectively.  
19  
20  
21  
22  
23

24 Remuneration consists of two parts: a basic salary and a bonus. For most doctors  
25  
26 (74%) their monthly salary was between 1, 000 and 3,000 RMB (1 USD = 6.16 RMB  
27  
28 in 2012), with only 1% paid more than 5,000 RMB per month and 29% paid between  
29  
30 3,000 and 5,000 RMB. Interestingly, 37% of county hospital doctors were paid less  
31  
32 than 1,000 RMB monthly and none of them earned over 3,000 RMB. But 19% and  
33  
34 17% respectively in primary care and tertiary hospitals were paid between 3,000 RMB  
35  
36 and 5,000 RMB. Up to 94% of junior doctors were paid 3,000 RMB or less, compared  
37  
38 to 77% middle ranked doctors and 65% of senior doctors. Annual bonuses, varied  
39  
40 mainly by the level of the hospital, 79% in primary care, 91% in secondary hospitals  
41  
42 and 38% in the tertiary hospital reported 30,000 RMB or less. Half (51%) in the  
43  
44 tertiary hospital received a bonus between 30,000 and 50,000, while only 15% and  
45  
46 9% respectively in primary and secondary hospitals earned this amount. Overall only  
47  
48 12 doctors (6%) reported 50,000 RMB or more; seven of these were primary care  
49  
50 doctors, five tertiary care doctors with none being county hospital doctors. Of those  
51  
52 who did overtime, more than 80% were not paid for it.  
53  
54  
55  
56  
57  
58  
59  
60

## Job satisfaction

Doctors' satisfaction with various aspects of work and conditions is shown in Table 3. Most striking are the differences between primary care practitioners and doctors in higher-level hospitals (county and provincial hospitals). Very low proportions of high-level hospital doctors were satisfied with their working conditions: only 7% at high-level hospitals were satisfied with work hours, compared to 43% in primary care. Percentages for satisfaction with basic salary were 3% and 27% respectively for higher level and primary care. Similar variations in bonuses were reported (6% at higher level versus 20% in primary care). Less than 10% at high levels were satisfied with the amount of paid vacation time (3%), amount of paid sick leave (5%) and opportunities for promotion (9%), with 38%, 41% and 25% respectively in primary care. Interestingly, primary care doctors were most likely to feel they had high social recognition (58%), compared with 29% at the provincial hospital and 23% at the county hospitals. Work relationships showed high levels of satisfaction across all health facilities. Levels of satisfaction with utilization of expertise, opportunity to update expertise and support for training showed only small differences by level.

Table 3 Doctors' job satisfaction by level of hospital (% of completely satisfied or satisfied)

| Items                                            | Satisfied<br>No (%) | 95% CIs of<br>percentages | Satisfied (%)        |                  |                      | p value<br>( $\chi^2$ tests) |
|--------------------------------------------------|---------------------|---------------------------|----------------------|------------------|----------------------|------------------------------|
|                                                  |                     |                           | By level of hospital |                  |                      |                              |
|                                                  |                     |                           | CHCs<br>(N=111)      | County<br>(N=43) | Provincial<br>(N=48) |                              |
| <b>Work schedule and job reward</b>              |                     |                           |                      |                  |                      |                              |
| Hours of work                                    | 52(25.7)            | 20.2 - 32.2               | 46(42.6)             | 2(4.7)           | 4(8.30)              | 0.000                        |
| Flexibility in scheduling                        | 47(23.3)            | 18.0 - 29.6               | 38(35.5)             | 5(11.6)          | 4(8.30)              | 0.000                        |
| Geographical location of work                    | 118(58.4)           | 51.5 - 65.0               | 68(63.0)             | 24(57.1)         | 26(54.2)             | 0.439                        |
| Basic salary                                     | 32(15.8)            | 11.5 - 21.5               | 29(27.4)             | 0(0.0)           | 3(6.3)               | 0.000                        |
| Bonus                                            | 26(12.9)            | 8.9 - 18.2                | 21(20.0)             | 3(7.0)           | 2(4.2)               | 0.000                        |
| Benefits (insurances, travelling etc.)           | 41(20.3)            | 15.3 - 26.4               | 32(30.2)             | 6(14.0)          | 3(6.3)               | 0.000                        |
| Amount of paid vacation time offered             | 43(21.3)            | 16.2 - 27.4               | 40(37.7)             | 1(2.3)           | 2(4.2)               | 0.000                        |
| Amount of paid sick leave offered                | 48(23.8)            | 18.4 - 30.1               | 43(41.0)             | 3(7.0)           | 2(4.2)               | 0.000                        |
| Opportunities for Promotion                      | 34(16.8)            | 12.3 - 22.6               | 26(24.5)             | 4(9.8)           | 4(8.7)               | 0.004                        |
| Job security                                     | 94(46.5)            | 39.8 - 53.4               | 55(50.9)             | 15(36.6)         | 24(51.1)             | 0.536                        |
| Recognition for work by supervisors/senior staff | 113(55.9)           | 49.1 - 62.6               | 65(60.2)             | 22(52.4)         | 26(55.3)             | 0.742                        |
| Recognition in society                           | 87(43.1)            | 36.4 - 50.0               | 63(58.3)             | 10(23.3)         | 14(29.2)             | 0.000                        |
| <b>Work relationships</b>                        |                     |                           |                      |                  |                      |                              |
| Relationships with co workers                    | 168(83.2)           | 77.4 - 87.7               | 96(88.1)             | 37(86.0)         | 35(72.9)             | 0.116                        |
| Relationship(s) with supervisor(s)               | 142(70.3)           | 63.7 - 76.2               | 79(75.2)             | 35(81.4)         | 28(59.6)             | 0.032                        |
| Relationships with subordinates                  | 150(74.3)           | 67.8 - 79.8               | 85(86.7)             | 32(80.0)         | 33(73.3)             | 0.247                        |
| Relationships with nurses                        | 168(83.2)           | 77.4 - 87.7               | 94(86.2)             | 38(88.4)         | 36(75.0)             | 0.271                        |



---

**Use and update of professional knowledge**


---

|                                                             |           |             |          |          |          |       |
|-------------------------------------------------------------|-----------|-------------|----------|----------|----------|-------|
| Opportunity to utilize your professional skills and talents | 105(52.0) | 45.1 - 58.8 | 60(56.1) | 21(48.8) | 24(51.1) | 0.938 |
| Opportunity to learn new skills and new knowledge           | 83(41.1)  | 34.5 - 48.0 | 42(38.9) | 16(37.2) | 25(52.1) | 0.573 |
| Support for training and education                          | 87(43.1)  | 36.4 - 50.0 | 49(47.6) | 19(44.2) | 19(39.6) | 0.914 |

**Patients' help seeking behaviours, demands and aggression (Table 4)**

Across all levels of facilities doctors felt patients were becoming more demanding: 84% reported that patients often went to higher level hospitals for simple medical problems which could be solved at primary care facilities, 80% said that patients just want to get drugs or tests rather than medical advice. Across all levels of facilities doctors reported that patients were becoming more aggressive in their demands, with perceptions of high and increasing levels of complaints from patients, who are much more likely to sue than previously, with 87% reporting that there was an increasing trend of violence against doctors. County level doctors consistently reported higher levels for all these items.

Table 4 Patients' help seeking behaviours, demands and aggression by level of hospital (% of strongly agree or agree)

| Items                                                                                                                                            | Agree<br>No (%) | 95% CIs<br>of<br>percentage | Agree(percent)  |                  |                      | p value<br>( $\chi^2$ tests) |
|--------------------------------------------------------------------------------------------------------------------------------------------------|-----------------|-----------------------------|-----------------|------------------|----------------------|------------------------------|
|                                                                                                                                                  |                 |                             | CHCs<br>(N=111) | County<br>(N=43) | Provincial<br>(N=48) |                              |
| Patients often go to higher level hospitals (e.g. tertiary hospitals) with simple complaints which could be dealt with at a lower level hospital | 169(83.7)       | 78.0 - 88.1                 | 95(87.2)        | 35(81.4)         | 39(83.0)             | 0.790                        |
| Sometimes patients just want to get drugs and tests rather than really seeking medical advice from doctors                                       | 162(80.2)       | 74.2 - 85.1                 | 84(79.2)        | 38(88.4)         | 40(85.1)             | 0.631                        |
| Nowadays patients are better informed about their own medical conditions so that sometimes they demand specific treatments from doctors          | 168(83.2)       | 77.4 - 87.7                 | 93(86.9)        | 36(85.7)         | 39(83.0)             | 0.949                        |
| Patients are becoming more aggressive in their demands                                                                                           | 144(71.3)       | 64.7 - 77.1                 | 66(60.6)        | 40(93.0)         | 38(80.9)             | 0.001                        |
| The number of complaints by patients has increased in recent years                                                                               | 153(75.7)       | 69.4 - 81.1                 | 77(72.6)        | 41(95.3)         | 35(72.9)             | 0.006                        |
| Patients are becoming more likely to sue them even when doctors are trying to do their best                                                      | 176(87.1)       | 81.8 - 91.1                 | 93(87.7)        | 43(100.0)        | 40(83.3)             | 0.107                        |
| Violence against doctors by their own patients is increasing                                                                                     | 176(87.1)       | 81.8 - 91.1                 | 92(86.8)        | 43(100.0)        | 41(85.4)             | 0.126                        |

### Influencing factors of job satisfaction

Analysis of Covariance (ANCOVA) comparing job satisfaction scores among sub-groups, adjusted by gender, age and education, are presented in Table 5. Doctors in the provincial hospital appeared to be the most dissatisfied group, and primary care physicians were most satisfied with their work ( $p < 0.001$ ). Those who had worked longer hours ( $p < 0.001$ ), did longer overtime hours ( $p < 0.05$ ), took on-call duties ( $p < 0.01$ ) were more likely to be dissatisfied. Doctors who reported average consultation times of 10-20 minutes per patient and higher monthly salary showed higher satisfaction ( $p < 0.01$ ). Doctors who had more negative perceptions of the doctor-patient relationship (thought patients were more demanding and aggressive) also had lower satisfaction scores.

Table 5 Influencing factors of doctors' job satisfaction controlling for gender, age and education

| Variables                                       | Overall job satisfaction |      |          |
|-------------------------------------------------|--------------------------|------|----------|
|                                                 | Mean                     | SD   | p value* |
| <b>Level of hospital</b>                        |                          |      | 0.000    |
| Primary (CHCs and THCs)                         | 3.23                     | 0.06 |          |
| Secondary (county hospitals)                    | 2.83                     | 0.08 |          |
| Tertiary(provincial hospital)                   | 2.82                     | 0.09 |          |
| <b>Position rank</b>                            |                          |      | 0.064    |
| Low                                             | 3.12                     | 0.06 |          |
| Middle                                          | 2.91                     | 0.06 |          |
| High                                            | 2.97                     | 0.15 |          |
| <b>Work hours per week</b>                      |                          |      | 0.000    |
| <50                                             | 3.23                     | 0.06 |          |
| 50 or more                                      | 2.92                     | 0.05 |          |
| <b>Outpatient visits per doctor per day</b>     |                          |      | 0.102    |
| <50                                             | 3.14                     | 0.07 |          |
| 50to 100                                        | 2.99                     | 0.07 |          |
| ≥100                                            | 2.85                     | 0.11 |          |
| Not applicable                                  | 3.12                     | 0.08 |          |
| <b>Average visit time per patient (minutes)</b> |                          |      | 0.004    |

|                                                                                                                                                  |      |      |       |
|--------------------------------------------------------------------------------------------------------------------------------------------------|------|------|-------|
| <10                                                                                                                                              | 2.92 | 0.05 |       |
| 10-20                                                                                                                                            | 3.23 | 0.08 |       |
| ≥20                                                                                                                                              | 2.97 | 0.25 |       |
| Not applicable                                                                                                                                   | 3.22 | 0.09 |       |
| <b>Overtime hours per week</b>                                                                                                                   |      |      | 0.020 |
| <10                                                                                                                                              | 3.15 | 0.05 |       |
| 10 to 30                                                                                                                                         | 2.95 | 0.06 |       |
| ≥ 30                                                                                                                                             | 2.83 | 0.13 |       |
| <b>On-call duties</b>                                                                                                                            |      |      | 0.001 |
| Yes                                                                                                                                              | 2.94 | 0.05 |       |
| No                                                                                                                                               | 3.26 | 0.08 |       |
| <b>Monthly salary</b>                                                                                                                            |      |      | 0.004 |
| <1,000 RMB                                                                                                                                       | 2.72 | 0.12 |       |
| 1,000-3,000 RMB                                                                                                                                  | 3.05 | 0.04 |       |
| ≥ 3,000 RMB                                                                                                                                      | 3.24 | 0.10 |       |
| <b>Patients' help seeking behaviours and aggression</b>                                                                                          |      |      |       |
| Patients often go to higher level hospitals (e.g. tertiary hospitals) with simple complaints which could be dealt with at a lower level hospital |      |      | 0.718 |
| Disagree                                                                                                                                         | 3.07 | 0.10 |       |
| Agree                                                                                                                                            | 3.04 | 0.04 |       |
| Sometimes patients just want to get drugs and tests rather than really seeking medical advice from doctors                                       |      |      | 0.040 |
| Disagree                                                                                                                                         | 3.22 | 0.09 |       |
| Agree                                                                                                                                            | 3.01 | 0.04 |       |
| Nowadays patients are better informed about their own medical conditions so that sometimes they demand specific treatments from doctors          |      |      | 0.586 |
| Disagree                                                                                                                                         | 2.99 | 0.11 |       |
| Agree                                                                                                                                            | 3.05 | 0.04 |       |
| Patients are becoming more aggressive in their demands                                                                                           |      |      | 0.008 |
| Disagree                                                                                                                                         | 3.22 | 0.08 |       |
| Agree                                                                                                                                            | 2.98 | 0.04 |       |
| Patients are becoming more likely to sue them even when doctors are trying to do their best                                                      |      |      | 0.532 |
| Disagree                                                                                                                                         | 3.12 | 0.13 |       |
| Agree                                                                                                                                            | 3.04 | 0.04 |       |
| The number of complaints by patients has increased in recent years                                                                               |      |      | 0.052 |
| Disagree                                                                                                                                         | 3.19 | 0.09 |       |
| Agree                                                                                                                                            | 3.00 | 0.04 |       |
| Violence against doctors by their own patients is increasing                                                                                     |      |      | 0.063 |
| Disagree                                                                                                                                         | 3.27 | 0.13 |       |
| Agree                                                                                                                                            | 3.02 | 0.04 |       |

\*p values for Analysis of Covariance (ANCOVA) controlling gender, age and education

1  
2  
3  
4  
5  
6 Finally, 88% (177) of the doctors said they would not want their children to be  
7 doctors. Of those 125 who provided a reason, 42 (34%) said poor pay, 22 (18%) said  
8 high pressure from work, and 21 (17%) said it was a high-risk profession. Eleven (9%)  
9 expressed concerns about personal insecurity or patient violence and conflicts, 11 (9%)  
10 cited the poor doctor patient relationship, and 17 (14%) stated low status and social  
11 recognition.  
12  
13  
14  
15  
16  
17  
18  
19

## 20 **DISCUSSION**

21  
22 This study provides some insights into the reasons for the low morale in the medical  
23 profession in China. Given perceived low status, high perceived risk of violence and  
24 increasing litigation, it is perhaps not surprising that job satisfaction is low and that  
25 the overwhelming majority of our sample (88%) do not want their children to be  
26 doctors. Concerns for the future of the medical profession, and threats to the health  
27 system are being voiced quite openly even by senior Chinese authorities.<sup>31</sup>  
28  
29  
30  
31  
32  
33  
34  
35  
36  
37

38 Our findings highlight the causes of low job satisfaction among doctors. They also  
39 show that despite being the best qualified, and having the highest status and the  
40 highest income, doctors at the provincial hospital were the most dissatisfied group,  
41 followed by county hospital doctors with primary care doctors the most satisfied. The  
42 causes of dissatisfaction fall into three main areas: low income, heavy workload and  
43 patient aggression. We will discuss these three factors together with the policy  
44 implications.  
45  
46  
47  
48  
49  
50  
51  
52  
53

### 54 **Income**

1  
2  
3 Low income is a major grievance, mirroring findings in previous studies.<sup>28 32</sup> Even at  
4  
5 provincial level, 80% earned an annual salary of 36,000 RMB or less. Among senior  
6  
7 doctors 35% earned more than this. This compared to the average annual income of  
8  
9 34,550 RMB in urban Zhejiang in 2012.<sup>33</sup> While bonuses increase this considerably  
10  
11 for some doctors, the overall income is still not regarded by most as sufficient  
12  
13 compensation for the long hours, and the risks incurred.  
14  
15

16  
17 To better remunerate doctors of course demands more resources, but government  
18  
19 investment in health remains insufficient. Total health expenditure remained under  
20  
21 5% of GDP before the health reforms in 2009 and saw a slight increase to 5.36% in  
22  
23 2012, compared to a GDP growth of 9.3% in 2011 and 7.8% in 2012.<sup>34 35</sup> This  
24  
25 compares with total health spending of around 10% of GDP in UK, Germany, France,  
26  
27 Norway, Canada, and Japan.<sup>36</sup> Government subsidy into these so-called public health  
28  
29 facilities, accounts for less than 10% of higher-level hospital revenue and 40% of  
30  
31 community health centre revenue.<sup>37 38</sup>  
32  
33  
34  
35

36 Fees for basic medical services, including doctors' consultation, nursing services and  
37  
38 surgical procedures, have been kept low ostensibly in order to ensure access to basic  
39  
40 care for all.<sup>39</sup> For example in Beijing<sup>40</sup>, a doctor consultation fee in an outpatient  
41  
42 department is 2.5 RMB at a community health centre and 4 RMB at a tertiary hospital.  
43  
44 The staff costs (surgeons, nurses, anaesthetists) for an appendectomy are 150 RMB.  
45  
46 These low costs are blamed in medical circles for the undervaluing medical  
47  
48 expertise.<sup>41</sup> Because these charges are kept low, facilities operate a market system,  
49  
50 making profits from prescribing drugs and tests. The health reforms were meant to  
51  
52 address the problem of perverse incentives, partly through the introduction of the zero  
53  
54 mark-up essential drug policy in 2009. The government started the policy in primary  
55  
56  
57  
58  
59  
60

1  
2  
3 care level and it is now being rolled-out in higher-level hospitals. With no mark-up  
4 from drugs now possible, the basic salary for the majority of doctors remains low.<sup>10</sup> A  
5 series of experimental initiatives aiming to augment doctors' income are being  
6 launched, such as pay-for-performance and raising prices of services, including  
7 consultation fees and procedures. But this may not fill the gap and doctors' income  
8 remains low. Some doctors are finding other ways to complement income. For  
9 example a shift is being seen towards prescribing more Traditional Chinese Medicine.

10  
11  
12  
13  
14  
15  
16  
17  
18  
19  
20 Appropriate measures to address effort-reward imbalance must be taken. First,  
21 increasing government funding to increase doctors' salary can help to attract and  
22 retain good doctors. Second, increasing charges for healthcare may be useful to  
23 increase hospital revenue, to reflect the value of doctors' expertise and to improve  
24 their self-value and morale. This increase should be covered by governmental  
25 insurance schemes. Third, involving doctors in proper evaluation and modifications of  
26 essential drug list policy is necessary, especially in deciding which drugs are on the  
27 list. There are known to be grievances about the content of the list and doctors want  
28 more autonomy in this regard.<sup>9</sup> Also, it is important to note the socioeconomic  
29 disparities across China. It is extremely difficult to prescribe a national strategy, and  
30 exploration of local policies tailored to local social-economic conditions is warranted.  
31  
32  
33  
34  
35  
36  
37  
38  
39  
40  
41  
42  
43  
44

### 45 **Workload**

46  
47  
48 Long working hours appear to be a major contributor to dissatisfaction, especially at  
49 provincial and county hospitals. Here the huge volume of outpatients makes it  
50 difficult to spend sufficient time with patients, affecting quality of care and the  
51 doctor-patient relationship. With no gatekeeping systems in primary care, many  
52  
53  
54  
55  
56  
57  
58  
59  
60



1  
2  
3 patients bypass lower levels to go to where they think they will get the best care, that  
4 is, provincial level hospitals. Inappropriate use of higher level care was commented  
5 on by 84% of our respondents. The health reform measures taken to strengthen  
6 primary care aimed partly to address this problem of massive overutilization of  
7 secondary and tertiary facilities for mostly minor conditions. But the reforms have  
8 probably made no difference.<sup>9</sup> This is because improvements in health insurance  
9 re-imburement have improved access, especially to higher-level facilities. Around  
10 96% of the population now have health insurance.<sup>42</sup> The outpatient throughput from  
11 2009 to 2012 increased by 50% from 303 million to 455 million.<sup>43</sup>

22  
23  
24 With 46% of all out-patient consultations occurring at county level and above in  
25 2012<sup>44</sup>, the sheer volume of out-patient visits necessitates a very short consultation,  
26 inevitably jeopardising the quality of care. The health reforms have failed to  
27 discourage patients from inappropriately using higher-level care for minor conditions  
28 and this was a major goal of the reforms.

29  
30  
31 The discrepancy in workload and pressure between primary and higher level care  
32 partly explains the differences in job satisfaction. In primary care doctors are not  
33 subject to the same pressures of long working hours, short and rushed consultations,  
34 and often unpaid overtime. In addition, primary care doctors mainly manage patients  
35 who are not seriously ill, and hence are less likely to be the target of patient  
36 complaints or aggression. To tackle the underlying problem of inappropriate use of  
37 higher level facilities, the primary care system needs to be further strengthened with  
38 the addition of a gate-keeping role. As we found in our study, primary care doctors  
39 have much lower educational attainment, and this may contribute to the long standing  
40 mistrust among the public. It has been 15 years since the introduction of community

1  
2  
3 health services as a new primary health care model in urban areas. Despite the  
4  
5 increasing government support, the general public still lack trust in these urban  
6  
7 primary care physicians.<sup>45</sup> The medical education curriculum needs to include more  
8  
9 primary care and thus attract more well-qualified doctors into primary care. This  
10  
11 would help to reduce patient flow to high level hospitals, and be far more  
12  
13 cost-effective. However, the potential impact of a gate-keeping policy on primary care  
14  
15 is not clear. Although it would make financial sense, a shift in workload to primary  
16  
17 care may reduce job satisfaction for doctors at this level, creating new problems. A  
18  
19 number of ongoing pilots in limited forms of gate-keeping<sup>46</sup>, may provide some  
20  
21 insights into the effects on job satisfaction across the three levels.  
22  
23  
24  
25

### 26 **Patient aggression**

27  
28  
29 Patients' aggressive demands and violence are having a serious impact on doctors' job  
30  
31 satisfaction.<sup>11 47</sup> The situation is compounded by the fact that many of these violent  
32  
33 events take place not only with impunity of the legal authorities, but also with the  
34  
35 tolerance of the general public. In addition, while many receive scant media publicity,  
36  
37 the internet spreads news of these events rapidly and widely. This has bred fears and  
38  
39 insecurity, contributing to low morale in the profession.<sup>12</sup>  
40  
41  
42  
43

44 The causes of this patient aggression are complex. First, perverse incentives and  
45  
46 doctors' profit seeking behaviours have compromised quality of care, and led to  
47  
48 erosion of professional ethics and higher medical costs.<sup>48</sup> Certain areas of the media  
49  
50 have taken to criticising doctors for their "irresponsible and wrong" advice, and  
51  
52 occasional cases of extremely high medical expenses, which make patients feel  
53  
54  
55  
56  
57  
58  
59  
60

1  
2  
3 exploited.<sup>49</sup> In addition, patients are better informed about medical problems due to  
4  
5 increasingly accessible health information, leading them to be more demanding.  
6  
7

8  
9 Second, in a commoditized health care system, despite high coverage of medical  
10  
11 insurance, patients are still paying a large portion of their medical expenses  
12  
13 out-of-pocket.<sup>37</sup> Together with long waiting times and short consultation times, poor  
14  
15 communication between doctors and patients can easily trigger tension between the  
16  
17 two parties when doctors fail to meet patients' high expectations. Third, as doctors are  
18  
19 the ones who dictate patient care, they are an easy target for patients' complaints and  
20  
21 frustration.  
22  
23

24  
25 Measures to prevent patient aggression against doctors are necessary. National  
26  
27 measures to strengthen hospital security and criminalize any acts causing hospital  
28  
29 disturbance were taken<sup>50</sup> soon after a doctor was killed by a 17 year-old patient in  
30  
31 2012. But these have been poorly enforced and critics argue that this does not solve  
32  
33 the underlying systemic issues. More radical solutions are needed to prevent violence  
34  
35 in health facilities. Policies of 'zero tolerance' towards violence in healthcare sectors  
36  
37 are recommended by the most influential medical associations in China.<sup>51</sup> But the  
38  
39 medical associations have no enforcement powers and are very rarely actually  
40  
41 involved in medical disputes. Education programs assisting doctors to prevent and  
42  
43 manage patient violence may also be beneficial.<sup>52</sup> An emphasis on doctor-patient  
44  
45 communication skills in the medical school syllabus may help improve the  
46  
47 doctor-patient relationship, and reduce patient aggression.<sup>53</sup>  
48  
49  
50  
51

## 52 53 **Limitations**

54  
55  
56  
57  
58  
59  
60

1  
2  
3 The study has some limitations. First, we sampled only four cities and counties in the  
4 province and only one provincial hospital. So the results have limited  
5 generalisability. The sample size was relatively small and doctors' participation was  
6 voluntary, leading to potential bias. However, we did sample across three levels of  
7 health institutions in four places, with different economic levels. Second, as there are  
8 almost no studies on this topic, comparisons could not be made. Thirdly, the job  
9 satisfaction score was developed for the paper and has not been formally validated.  
10 Nevertheless, it enabled us to compare the job satisfaction of doctors across different  
11 levels of hospital. But as a first study comparing job satisfaction at three levels of  
12 facility and exploring associated systemic factors, we have provided a starting point  
13 for further research into exploring related issues in China.  
14  
15  
16  
17  
18  
19  
20  
21  
22  
23  
24  
25  
26  
27

## 28 **CONCLUSION**

29  
30  
31 Doctors in Zhejiang province, China, have low job satisfaction overall. Measures  
32 must be taken to address this in order to address future problems of recruitment and  
33 retention of doctors. These measures must include reduction of doctors' workload,  
34 especially at provincial hospitals, increase in doctors' salary, and more punitive  
35 measures against individuals who commit violent acts against doctors.  
36  
37  
38  
39  
40  
41  
42  
43  
44  
45  
46  
47  
48  
49  
50  
51  
52  
53  
54  
55  
56  
57  
58  
59  
60

### **Acknowledgements**

The authors gratefully acknowledge Professor Yu Hai and Professor Du Ya Ping, Yu Di Di from School of Medicine, Zhejiang University, Mao Li Nan from Health Bureau of Zhejiang province, Zhou Peng Cheng from Xiangya Hospital Central South University for their help during questionnaire development and data collection, and Professor Lam Tai Pong from the University of Hong Kong for his kind support during manuscript preparation.

### **Authors' contributions**

TH and DW designed the study and the questionnaire. DW carried out the survey. KFL and YW performed the statistical analysis. DW, TH and YW interpreted the analysis. DW and TH drafted the manuscript. All authors read and approved the final manuscript.

### **Funding**

This research received no specific grant from any funding agency in the public, commercial or not-for-profit sectors

### **Competing interests**

The authors declare that they have no competing interests.

### **Ethical approvals**

The study is a student research project that has received ethical approval from the UCL Research Ethics Committee.

## Data sharing statement

No additional data are available.

## REFERENCES

1. Li D, Yin W, Zhang X, et al. Investigation on turnover intention of medical staff in public hospitals and research of early-warning system's construction. *Chinese Journal of Hospital Administration* 2010;**26**(03):218-21.
2. National Health and Family Planning Commission PRC. *Research on relationship between Yi and Huan in China, 2008*: Center for Health Statistics and Information 2008:P106.
3. Wang ZG. *Worrying conditions of doctors' practising environment: 78% of the doctors do not want their children to be doctors 2013*. [http://news.china.com.cn/2013-10/27/content\\_30414901.htm](http://news.china.com.cn/2013-10/27/content_30414901.htm) (accessed 3 Mar 2014).
4. Shanghai Jiao Tong University. *Announcement of results of changing majors for students admitted in 2013*. <http://www.jwc.sjtu.edu.cn/web/sjtu/198015-1980000004584.htm> (accessed 27 May 2014).
5. Flaherty JH, Liu ML, Ding L, et al. China: the aging giant. *J Am Geriatr Soc* 2007;**55**(8):1295-300.
6. CDC US. *U.S. CDC IN CHINA: 2010-2011 Annual Report Healthy People in a Health China*, 2013.
7. Song K, Scott A, Sivey P, et al. Improving Chinese primary care providers' recruitment and retention: a discrete choice experiment. *Health Policy Plan* 2013.
8. China Daily. *WeChat poll revealed "90% of participants do not want children to be doctors: high pressure and intense doctor-patient conflicts are main reasons"*. [http://www.chinadaily.com.cn/micro-reading/dzh/2014-04-23/content\\_11627822.html](http://www.chinadaily.com.cn/micro-reading/dzh/2014-04-23/content_11627822.html) (accessed 23 May 2014).
9. Zhou XD, Li L, Hesketh T. Health system reform in rural China: Voices of healthworkers and service-users. *Soc Sci Med* 2014;**117**:134-41.

- 1  
2  
3 10. Guan XD, Liang HG, Xue YJ, et al. An analysis of China's national essential  
4 medicines policy. *J Public Health Policy* 2011;**32**(3):305-19.  
5  
6  
7 11. Zhang X, Sleeboom-Faulkner M. Tensions between medical professionals and  
8 patients in mainland China. *Camb Q Healthc Ethics* 2011;**20**(3):458.  
9  
10  
11 12. Hesketh T, Wu D, Mao LN, et al. Violence against doctors in China. *Br Med J*  
12 2012;**345**.  
13  
14  
15 13. Wang ZG. *Yi Nao incidents increased by 7000 over last five years: illegal gangs*  
16 *made huge profits* 2012.  
17 [http://www.china.com.cn/news/2012-05/03/content\\_25287333\\_2.htm](http://www.china.com.cn/news/2012-05/03/content_25287333_2.htm) (accessed 23 Jul  
18 2014).  
19  
20  
21  
22 14. Xiong C. *Medical malpractice and medical disputes*. Chinese Hospital  
23 Association Guide 2006.  
24  
25  
26 15. Wu SY, Zhu W, Li HY, et al. Workplace violence and influencing factors among  
27 medical professionals in China. *Am J Ind Med* 2012;**55**(11):1000-08.  
28  
29  
30 16. Ding Xiang Yuan. *Chinese Hospital Association: violence against doctors gets*  
31 *worse*. <http://vote.dxy.cn/report/dxy/id/57914> (accessed 28 Feb 2014).  
32  
33  
34 17. BMA. *Violence at work: the experience of UK doctors*: Health Policy and  
35 Economic Research Unit, British Medical Association, 2003.  
36  
37  
38 18. Algwaiz WM, Alghanim SA. Violence exposure among health care professionals  
39 in Saudi public hospitals. A preliminary investigation. *Saudi Med J* 2012;**33**(1):76-82.  
40  
41  
42 19. Behnam M, Tillotson RD, Davis SM, et al. Violence in the emergency department:  
43 a national survey of emergency medicine residents and attending physicians. *J Emerg*  
44 *Med* 2011;**40**(5):565-79.  
45  
46  
47 20. Forrest LE, Herath PM, McRae IS, et al. A national survey of general  
48 practitioners' experiences of patient-initiated aggression in Australia. *Med J Aus*  
49 2011;**194**(11):605-08.  
50  
51  
52 21. Joa TS, Morken T. Violence towards personnel in out-of-hours primary care: a  
53 cross-sectional study. *Scand J Prim Health Care* 2012;**30**(1):55-60.  
54  
55  
56  
57  
58  
59  
60

- 1  
2  
3 22. Kowalenko T, Walters BL, Khare RK, et al. Workplace violence: a survey of  
4 emergency physicians in the state of Michigan. *Ann Emerg Med* 2005;**46**(2):142-47.  
5  
6  
7 23. Magnavita N, Heponiemi T. Violence towards health care workers in a Public  
8 Health Care Facility in Italy: a repeated cross-sectional study. *BMC Health Serv Res*  
9 2012;**12**(1):108.  
10  
11  
12 24. Mirza NM, Amjad AI, Bhatti ABH, et al. Violence and abuse faced by junior  
13 physicians in the emergency department from patients and their caretakers: a  
14 nationwide study from Pakistan. *J Emerg Med* 2012;**42**(6):727-33.  
15  
16  
17 25. Saeki K, Okamoto N, Tomioka K, et al. Work-related aggression and violence  
18 committed by patients and its psychological influence on doctors. *J Occup Health*  
19 2011;**53**(5):356-64.  
20  
21  
22  
23 26. Sibbald B, Bojke C, Gravelle H. National survey of job satisfaction and retirement  
24 intentions among general practitioners in England. *Br Med J* 2003;**326**(7379):22.  
25  
26  
27 27. Liu JA, Wang Q, Lu ZX. Job satisfaction and its modeling among township health  
28 center employees: a quantitative study in poor rural China. *BMC Health Serv Res*  
29 2010;**10**(1):115.  
30  
31  
32 28. Shi L, Song K, Rane S, et al. Factors associated with job satisfaction by Chinese  
33 primary care providers. *Prim Health Care Res Dev* 2014;**15**(01):46-57.  
34  
35  
36 29. Thakur M. Job satisfaction in banking: A study of private and public sector banks.  
37 *The IUP Journal of Bank Management* 2007;**6**(4):60-68.  
38  
39  
40 30. Buciuuniene I, Blazeviciene A, Bliudziute E. Health care reform and job  
41 satisfaction of primary health care physicians in Lithuania. *BMC Fam Pract*  
42 2005;**6**(1):10.  
43  
44  
45 31. Ren Min Wang PRC. *Liao Xin Bo: Improve doctors' dignity.*  
46 <http://www.people.com.cn/n/2014/0213/c347759-24348138.html> (accessed 23 May  
47 2014).  
48  
49  
50 32. Lim M-K, Yang H, Zhang T, et al. China's evolving health care market: how  
51 doctors feel and what they think. *Health Policy* 2004;**69**(3):329-37.  
52  
53  
54 33. Zhejiang Provincial Bureau of Statistics. *Statistical report on national economy*  
55 *and social development in Zhejiang Province, 2012.*  
56  
57  
58  
59  
60



1  
2  
3 [http://tjj.zj.gov.cn/tjgb/gmjshfzgb/201302/t20130208\\_122162.html](http://tjj.zj.gov.cn/tjgb/gmjshfzgb/201302/t20130208_122162.html) (accessed 21 Feb  
4 2014).

5  
6  
7 34. The World Bank. *World Development Indicators: GDP growth (annual %)*.  
8 <http://data.worldbank.org/indicator/NY.GDP.MKTP.KD.ZG> (accessed 7 Apr 2014).

9  
10  
11 35. National Health and Family Planning Commission PRC. *Health statistics in China,*  
12 *2012*.  
13 [http://www.moh.gov.cn/zwgkzt/ptjty/201206/55044/files/3ca7756121334b7a870a25a](http://www.moh.gov.cn/zwgkzt/ptjty/201206/55044/files/3ca7756121334b7a870a25ac79988f23.pdf)  
14 [c79988f23.pdf](http://www.moh.gov.cn/zwgkzt/ptjty/201206/55044/files/3ca7756121334b7a870a25ac79988f23.pdf) (accessed 7 Apr 2014).

15  
16  
17 36. The World Bank. *Health expenditure, total (% of GDP) 2012*.  
18 <http://data.worldbank.org/indicator/SH.XPD.TOTL.ZS> (accessed 24 May 2014).

19  
20  
21 37. National Health and Family Planning Commission PRC. *China Health Statistics*  
22 *Yearbook 2013*.  
23 <http://www.nhfpc.gov.cn/htmlfiles/zwgkzt/ptjnj/year2013/index2013.html> (accessed  
24 23 May 2014).

25  
26  
27 38. Ren YJ, Ji QY. Analysis of salary distribution system in public hospitals. *Journal*  
28 *of Shanghai Jiaotong University (Medical Science)* 2013;**33**(6).

29  
30  
31 39. Yip W, Hsiao WC. The Chinese health system at a crossroads. *Health Aff*  
32 *2008*;**27**(2):460-68.

33  
34  
35 40. Beijing Municipal Commission of Development and Reform. *Prices of medical*  
36 *services in Beijing*. <http://service2.bjpc.gov.cn/bjpc/mediprice/MedicalService1.jsp>  
37 (accessed 28 Apr 2014).

38  
39  
40 41. Wang XH. *Zhong Nan Shan: Chinese doctors survive by selling drugs and the*  
41 *value of their expertise is not being reflected*.  
42 [http://news.xinhuanet.com/health/2014-03/06/c\\_126226620.htm](http://news.xinhuanet.com/health/2014-03/06/c_126226620.htm) (accessed 24 May  
43 2014).

44  
45  
46 42. Meng Q, Xu L, Zhang Y, et al. Trends in access to health services and financial  
47 protection in China between 2003 and 2011: a cross-sectional study. *Lancet*  
48 *2012*;**379**(9818):805-14.

49  
50  
51 43. Health Bureau of Zhejiang Province. *Health statistics in Zhejiang Province*.  
52 <http://www.zjwst.gov.cn/col/col320/index.html###> (accessed 31 Mar 2014 ).

- 1  
2  
3 44. Health Bureau of Zhejiang Province. *Outpatient services in health facilities in*  
4 *Zhejiang Province, 2012.*  
5 [http://www.zjwst.gov.cn/art/2013/4/15/art\\_320\\_227356.html](http://www.zjwst.gov.cn/art/2013/4/15/art_320_227356.html) (accessed 31 Mar  
6 2014 ).  
7  
8  
9 45. Du J, Lu X, Wang Y, et al. Mutual referral: a survey of GPs in Beijing. *Fam Pract*  
10 2012;**29**(4):441-7.  
11  
12  
13 46. Jia L, Ze Yong F. Dilemma of Community First Contact Care. *Chinese General*  
14 *Practice* 2012;**15**(3A):720-22.  
15  
16  
17 47. Yao Y, Wang W, Wang F, et al. General self-efficacy and the effect of hospital  
18 workplace violence on doctors' stress and job satisfaction in China. *Int J Occup Med*  
19 *Environ Health* 2014;**27**(3):1-11.  
20  
21  
22  
23 48. Yip WC-M, Hsiao W, Meng Q, et al. Realignment of incentives for health-care  
24 providers in China. *Lancet* 2010;**375**(9720):1120-30.  
25  
26  
27 49. Jie YX. *10 doctors calls for apologies from mass media about falsified reports*  
28 *2014.*  
29 <http://www.yxj.org.cn/news/yijieyaowen/shehuijiaodian/2014052109582936651.htm>  
30 (accessed 23 May 2014 ).  
31  
32  
33 50. National Health and Family Planning Commission PRC. *The directive of*  
34 *maintaining order at medical institutions by Police Department, Ministry of Health.*  
35 <http://wsb.moh.gov.cn/zwgkzt/ptg/201204/54578.shtml> (accessed 11 Feb 2014).  
36  
37  
38 51. CMA. *United call for "Zero tolerance to medical violence" by Chinese Medical*  
39 *Association, Chinese Medical Doctor Association, Chinese Hospital Association and*  
40 *Chinese Health Law Society.*  
41 [http://www.cma.org.cn/index/xhdt/20131029/1383026180011\\_1.html](http://www.cma.org.cn/index/xhdt/20131029/1383026180011_1.html) (accessed 11  
42 Feb 2014).  
43  
44  
45 52. Zernike W, Sharpe P. Patient aggression in a general hospital setting: do nurses  
46 perceive it to be a problem? *Int J Nurs Pract* 1998;**4**(2):126-33.  
47  
48  
49  
50 53. Ong LM, De Haes JC, Hoos AM, et al. Doctor-patient communication: a review  
51 of the literature. *Soc Sci Med* 1995;**40**(7):903-18.  
52  
53  
54  
55  
56  
57  
58  
59  
60

1  
2  
3 **Health system reforms, violence against doctors and job satisfaction in the**  
4 **medical profession: a cross-sectional survey in Zhejiang Province, Eastern China**  
5  
6  
7

8 **Dan WU<sup>1</sup>, Yun WANG<sup>2</sup>, Kwok Fai LAM<sup>3</sup>, Therese HESKETH<sup>4,\*</sup>**  
9

10  
11 <sup>1</sup> Department of Family Medicine and Primary Care, Faculty of Medicine, The  
12 University of Hong Kong, Hong Kong  
13

14  
15  
16 <sup>2</sup> Centre for Suicide Research and Prevention, Faculty of Social Sciences, The  
17 University of Hong Kong, Hong Kong  
18

19  
20  
21 <sup>3</sup> Department of Statistics and Actuarial Science, Faculty of Science, The University  
22 of Hong Kong, Hong Kong  
23

24  
25  
26 <sup>4</sup> UCL Institute of Global Health, University College London  
27

28  
29 \*Correspondence to Professor Therese Hesketh, UCL Institute for Global Health, 30  
31 Guilford Street, London WC1N 1EH, UK; Email: [t.hesketh@ich.ucl.ac.uk](mailto:t.hesketh@ich.ucl.ac.uk);  
32

33  
34 Tel: +207-905-2253  
35

36  
37 **Keywords:** health reform, China, patient aggression, doctors, job satisfaction,  
38

39 | Word count: ~~3844~~ 4059  
40

41 | Number of tables and/or figures: 5  
42

43 | Number of references: ~~5253~~  
44

45 | Checklist used for structuring the article: STROBE  
46  
47  
48  
49  
50  
51  
52  
53  
54  
55  
56  
57  
58  
59  
60

**Abstract**

**Objective:** To explore the factors influencing doctors' job satisfaction and morale in China, in the context of the ongoing health system reforms and the deteriorating doctor-patient relationship

**Design:** Cross-sectional survey using self-completion questionnaires.

**Study setting:** The survey was conducted from March to May 2012 among doctors at provincial, county and primary care levels, in Zhejiang Province, China.

**Results:** The questionnaire was completed by 202 doctors. Factors which contributed most to low job satisfaction were low income and long working hours. Provincial level doctors were most dissatisfied while primary care doctors were the least dissatisfied. Three percent of doctors at high-level hospitals and 27% of those in primary care were satisfied with the salary. Only 7% at high-level hospitals were satisfied with work hours, compared to 43% in primary care. Less than 10% at high levels were satisfied with amount of paid vacation time (3%) and paid sick leave (5%), compared with 38% and 41% respectively in primary care.

Overall, 87% reported that patients were more likely to sue and that patient violence against doctors was increasing. Only 4.5% wanted their children to be doctors. Of those 125 who provided a reason, 34% said poor pay, 17% said it was a high-risk profession, and 9% expressed concerns about personal insecurity or patient violence.

**Conclusions:** Doctors have low job satisfaction overall. Recruitment and retention of doctors have become major challenges for the Chinese health system. Measures must be taken to address this, in order to [ensure recruitment and retention of doctors in the](#)

1  
2  
3 | ~~future. prevent a serious human resource crisis in the profession.~~ These measures must  
4  
5 include reduction of doctors' workload especially at provincial hospitals, increase in  
6  
7 | doctors' salary and more effective measures ~~to tackling~~ patient violence against  
8  
9 | doctors.  
10

### 11 12 13 14 15 16 **Strengths and limitations of this study** 17

- 18  
19  
20 | • Our study is one of the first ~~to studies~~ investigat~~ing~~ doctors' job satisfaction in  
21  
22 | China, since the instigation of the health reforms in 2009.  
23
- 24 | • We compared doctors' job satisfaction across three levels of health facility and  
25  
26 | explored associated systemic factors.  
27
- 28 | • Our study document~~ed~~ for the first time that ~~the~~ increasing patient violence is a  
29  
30 | major contributor to doctors' low morale  
31
- 32 | • The generalizability of the study is constrained by the limited number of  
33  
34 | participating health facilities and the small sample size.  
35  
36

## INTRODUCTION

The Chinese medical profession is facing serious problems with recruitment and retention of doctors. ~~a human resource crisis~~ Evidence from a number of sources illustrates low levels of morale in the profession. In a study of 933 doctors in 29 public hospitals in Shandong province, 49% said they intended to leave the profession.<sup>1</sup> Other studies have shown that only 24% of doctors would choose the profession if they had a second chance<sup>2</sup> and 78% would not want their own children to be doctors.<sup>3</sup> At Shanghai Jiao Tong University, which is among the top five in the country, 10% of the second year medical students transferred to other majors in 2013.<sup>4</sup> These worrying manifestations of discontent come at a time when more doctors are needed, given the pressures of an ageing population<sup>5</sup> and a growing non-communicable diseases burden.<sup>6</sup> Recruitment and retention of doctors have become major challenges for the health system in China.<sup>7</sup>

There is evidence that this situation is worsening<sup>8</sup>, so urgent measures are needed to reverse this trend. Clearly, such measures need to include addressing the underlying causes of this discontent. The aim of this study was to explore these underlying causes through surveying the views of doctors working at three levels of the health system: tertiary, secondary and primary care. Primary level facilities are supposed to provide preventive and basic medical services, while secondary and tertiary hospitals provide specialized care. The study was conducted in 2012, three years after the inception of major health system reforms, aiming to provide universal healthcare by 2020 with a focus on strengthening primary care. The reforms have also had impacts on doctors' working conditions: changes to health insurance have made healthcare more affordable at all levels, resulting in increased workload for doctors, especially at

1  
2  
3 secondary and tertiary level hospitals, even for minor illness. The introduction of an  
4 essential drug list for primary care, which aims to reduce perverse incentives for  
5 overprescribing to forbid profit on drugs, has reduced doctors' autonomy and reduced  
6 their income.<sup>9</sup> This loss of income from the mark-up in primary care has been  
7 replaced with a fixed salary and in some places a performance-based bonus, which in  
8 most cases is lower than previous earnings.<sup>10</sup>

9  
10  
11  
12  
13  
14  
15  
16  
17 Another important contributor to morale is a recent deterioration in the doctor-patient  
18 relationship.<sup>11</sup> The most extreme manifestation of this is a rise in levels of violence  
19 against health workers, along with damage and disturbance to health facilities. In  
20 China, this phenomenon is known as Yi Nao, which translates as (medical or hospital  
21 disturbance). This is usually caused by patients or their relatives as a reaction to what  
22 may be perceived, rightly or wrongly, as failures or mistakes by hospital staff.  
23 Sometimes the situation escalates with aggrieved patients and relatives hiring criminal  
24 gangs, prepared to go to extreme lengths, to threaten the hospital to provide  
25 compensation.<sup>12</sup> Yi Nao events are not rare. The Ministry of Health reported that the  
26 number of "major disturbances" involving physical violence nearly doubled from  
27 9,831 in 2006 to 17,243 in 2010.<sup>13</sup> In a 2006 study of 270 hospitals, over 70%  
28 reported that they had experienced Yi Nao incidents.<sup>14</sup> A study of 12 hospitals in 2009  
29 revealed that, of 2,464 medical professionals, 50% experienced workplace violence  
30 over the last 12 months, with 20% encountering physical abuse at least once.<sup>15</sup> A 2012  
31 survey conducted by the Chinese Hospital Association in 316 public hospitals in 30  
32 provinces revealed that the proportion of hospitals, which reported incidents of  
33 physical violence causing harm, had increased from 48% in 2008 to 64% in 2012. Of  
34 these, 8% of hospitals reported six or more incidents of physical violence every  
35  
36  
37  
38  
39  
40  
41  
42  
43  
44  
45  
46  
47  
48  
49  
50  
51  
52  
53  
54  
55  
56  
57  
58  
59  
60

1  
2  
3 year.<sup>16</sup> Violence against health personnel is not unique to China. It has been reported  
4  
5 from many other countries, including countries as diverse as the UK, US, Italy, Saudi  
6  
7 Arabia, Pakistan and Japan.<sup>17-25</sup> And many other countries are facing challenges with  
8  
9 the recruitment and retention of doctors.<sup>26</sup> Therefore, lessons from the Chinese  
10  
11 experience are relevant for other countries.  
12

13  
14  
15 The overall objectives of this study were: 1) to explore the factors influencing  
16  
17 doctors' job satisfaction and morale, with a special focus on the impacts of health  
18  
19 system reforms and the deteriorating doctor-patient relationship, and 2) to compare  
20  
21 doctors working at the three levels in the Chinese health system.  
22  
23

## 24 25 **METHODS**

### 26 27 28 **Sampling and data collection**

29  
30  
31 This cross-sectional survey was conducted from March to May 2012 in health  
32  
33 facilities in Zhejiang province, Eastern China. Zhejiang has a population of 55 million  
34  
35 and is ranked fourth in terms of GDP per capita among China's 33 provinces.  
36  
37

38  
39 A multi-stage stratified purposive sampling method was adopted (Table 1). We first  
40  
41 selected four cities or counties which represented high (Hangzhou and Yiwu), middle  
42  
43 (Anji) and low-level (Xianju) economic development in Zhejiang province. In the  
44  
45 second stage 10 health facilities were purposively sampled in the four cities/counties  
46  
47 to represent a range of health facilities: in urban areas a multi-specialism provincial  
48  
49 hospital (tertiary level) in Hangzhou, the main county hospitals (secondary level) in  
50  
51 Anji and Xianju respectively, and two community health centres/township health  
52  
53 centres (providers of primary care in urban and rural areas) in each city/county were  
54  
55  
56  
57  
58  
59  
60



invited to participate (one in Xianju county refused). In total, four community health centres (CHCs) in urban cities and three township health centres (THCs) in rural counties were selected based on their general representativeness in the city/county.

Table 1 Sampling strategy and achieved sample size by area

| Cities   | Income level  | Participating hospitals | Sample size | Total sample size |
|----------|---------------|-------------------------|-------------|-------------------|
| Hangzhou | High-income   | 1 provincial hospital   | 48          | 60                |
|          |               | 2 CHCs <sup>a</sup>     | 12          |                   |
| Yiwu     | High-income   | 2 CHCs                  | 54          | 54                |
| Anji     | Middle-income | 1 county hospital       | 24          | 41                |
|          |               | 2 THCs <sup>b</sup>     | 17          |                   |
| Xianju   | Low-income    | 1 county hospital       | 19          | 47                |
|          |               | 1 THC                   | 28          |                   |
| Total    |               | 10                      |             | 202               |

<sup>a</sup>CHCs: Community Health Centres

<sup>b</sup>THCs: Township Health Centres

At provincial level hospitals and county hospitals participants were internal medical doctors and surgeons, who were present in inpatient wards at the time of the survey.

At CHCs and THCs, primary care physicians present in clinics at the time of the survey were recruited.

Prospective participants were told that the questionnaire was about job satisfaction, that completion was voluntary, and that respondent anonymity and confidentiality would be strictly protected. Ethical approval was obtained from University College London. Local approvals were obtained from Zhejiang Health Bureau and local health authorities.

## Measurement methods

1  
2  
3 We developed the questionnaire based partly on existing questionnaires<sup>27-30</sup> with some  
4 items added and modified to specifically reflect the Chinese setting. Most questions  
5 used a five-point Likert scale ranging from 1 (not satisfied at all or strongly disagree)  
6 to 5 (extremely satisfied or strongly agree). The questionnaire included items about  
7 job satisfaction in general, perceptions about patients' health seeking behaviours and  
8 experience of patient aggression. Reverse scoring was used for questions phrased in  
9 the negative. The questionnaire was piloted, and modifications were made according  
10 to feedback.  
11  
12  
13  
14  
15  
16  
17  
18  
19

### 20 21 22 **Statistical analysis**

23  
24  
25 The data were analysed using IBM SPSS version 21. Comparisons between three  
26 levels of facility were conducted using Chi-square tests. We generated an overall job  
27 satisfaction score by computing the mean of 19 satisfaction items. The satisfaction  
28 score ranges from 1 (the lowest satisfaction) to 5 (the highest satisfaction). A higher  
29 score means higher satisfaction level. Analysis of Covariance (ANCOVA) was  
30 performed to compare satisfaction scores by level of response of associated factors  
31 controlling for gender, age and education.  
32  
33  
34  
35  
36  
37  
38  
39  
40

## 41 42 **RESULTS**

### 43 44 45 **Sample characteristics**

46  
47  
48 Characteristics of the study sample are shown in Table 2. Two hundred and two  
49 doctors completed questionnaires with a response rate of 81%. Forty-eight were from  
50 the provincial hospital, 43 from county hospitals, and 111 from primary care facilities.  
51  
52  
53 The mean age was 35.2 (SD=7.6), and 105 doctors were male, with 85 female. Only  
54  
55  
56  
57  
58  
59  
60

29% of primary care doctors had ~~an undergraduate degree~~ obtained a five-year formal medical education qualification compared with 93% and 96% at county and provincial level respectively.

Table 2 Characteristics of the sample and basic working conditions by level of hospital n (%)

|                                             | Total<br>N=202 | Level of hospital |                |                    | p value<br>( $\chi^2$ tests) |
|---------------------------------------------|----------------|-------------------|----------------|--------------------|------------------------------|
|                                             |                | CHCs<br>N=111     | County<br>N=43 | Provincial<br>N=48 |                              |
| <b>Age (mean and SD)</b>                    | 35.2(7.6)      | 36.1(8.6)         | 34.2(7.4)      | 34.0(4.1)          | 0.196                        |
| <b>Gender</b>                               |                |                   |                |                    | 0.001                        |
| Male                                        | 105(52.0)      | 45(40.5)          | 33(76.7)       | 27(56.3)           |                              |
| Female                                      | 85(42.1)       | 59(53.2)          | 10(23.3)       | 16(33.3)           |                              |
| Missing                                     | 12(5.9)        | 7(6.3)            | 0              | 5(10.4)            |                              |
| <b>Education level</b>                      |                |                   |                |                    | 0.000                        |
| Post-secondary level or less                | 78(38.6)       | 75(67.6)          | 3(7.0)         | 0(0)               |                              |
| Undergraduate or higher                     | 118(58.4)      | 32(28.8)          | 40(93.0)       | 46(95.8)           |                              |
| Missing                                     | 6(3.0)         | 4(3.6)            | 0              | 2(4.2)             |                              |
| <b>Position rank</b>                        |                |                   |                |                    | 0.001                        |
| Low                                         | 81(40.1)       | 51(45.9)          | 21(48.8)       | 9(18.8)            |                              |
| Middle                                      | 81(40.1)       | 36(32.4)          | 16(37.2)       | 29(60.4)           |                              |
| High                                        | 18(8.9)        | 4(3.6)            | 6(14.0)        | 8(16.7)            |                              |
| Missing                                     | 22(10.9)       | 20(18.0)          | 0              | 2(4.2)             |                              |
| <b>Work hours/week</b>                      |                |                   |                |                    | 0.000                        |
| < 40                                        | 16(8.2)        | 15(13.5)          | 0              | 1(2.1)             |                              |
| 40 to 50                                    | 60(30.6)       | 42(37.8)          | 13(30.2)       | 5(10.4)            |                              |
| 50 to 60                                    | 48(24.5)       | 27(24.3)          | 10(23.3)       | 11(22.9)           |                              |
| ≥ 60                                        | 72(36.7)       | 23(20.7)          | 20(46.5)       | 29(60.4)           |                              |
| Missing                                     | 6(3.0)         | 4(3.6)            | 0              | 2(4.2)             |                              |
| <b>Outpatient visits per doctor per day</b> |                |                   |                |                    | 0.000                        |
| < 50                                        | 67(33.2)       | 45(40.5)          | 17(39.5)       | 5(10.4)            |                              |
| 50 to 100                                   | 58(28.7)       | 34(30.6)          | 13(30.2)       | 11(22.9)           |                              |
| ≥100                                        | 27(13.4)       | 3(2.7)            | 2(4.7)         | 22(45.8)           |                              |
| Not applicable                              | 40(20.8)       | 24(21.6)          | 9(20.9)        | 7(14.6)            |                              |
| Missing                                     | 10(5.0)        | 5(4.5)            | 2(4.7)         | 3(6.3)             |                              |
| <b>Average visit time/patient (minutes)</b> |                |                   |                |                    | 0.001                        |
| ≤ 4                                         | 32(15.8)       | 8(7.2)            | 6(14.0)        | 18(37.5)           |                              |
| 5-9                                         | 83(41.1)       | 46(41.4)          | 21(48.8)       | 16(33.3)           |                              |
| 10-14                                       | 31(15.3)       | 18(16.2)          | 8(18.6)        | 5(10.4)            |                              |
| 15-20                                       | 10(5.0)        | 7(6.3)            | 1(2.3)         | 2(4.2)             |                              |

|                                    |           |          |          |          |       |
|------------------------------------|-----------|----------|----------|----------|-------|
| ≥20                                | 5(2.5)    | 4(3.6)   | 1(2.3)   | 0(0)     |       |
| Not applicable                     | 33(16.3)  | 24(21.6) | 4(9.3)   | 5(10.4)  |       |
| Missing                            | 8(4.0)    | 4(3.6)   | 2(4.7)   | 2(4.2)   |       |
| <b>Overtime hours per week</b>     |           |          |          |          | 0.000 |
| < 10                               | 103(51.0) | 69(62.2) | 23(53.5) | 11(22.9) |       |
| 10 to 30                           | 74(36.6)  | 35(31.5) | 15(34.9) | 24(50.0) |       |
| ≥ 30                               | 17(8.4)   | 2(1.8)   | 4(9.3)   | 11(22.9) |       |
| Missing                            | 8(4.0)    | 5(4.5)   | 1(2.3)   | 2(4.2)   |       |
| <b>On-call duties</b>              |           |          |          |          | 0.000 |
| Yes                                | 131(64.9) | 53(47.7) | 35(81.4) | 43(89.6) |       |
| No                                 | 61(30.2)  | 52(46.8) | 7(16.3)  | 2(4.2)   |       |
| Missing                            | 10(5.0)   | 6(5.4)   | 1(2.3)   | 3(6.2)   |       |
| <b>Monthly salary</b>              |           |          |          |          | 0.000 |
| < 1,000 RMB                        | 20(10.2)  | 2(1.8)   | 16(37.2) | 2(4.2)   |       |
| 1,000 – 3,000 RMB                  | 146(74.1) | 84(75.7) | 27(62.8) | 35(72.9) |       |
| 3,000 – 5,000 RMB                  | 29(14.7)  | 21(18.9) | 0        | 8(16.7)  |       |
| ≥ 5,000 RMB                        | 2(1.0)    | 1(0.9)   | 0        | 1(2.1)   |       |
| Missing                            | 5(2.5)    | 3(2.7)   | 0        | 2(4.2)   |       |
| <b>Total bonus last year (RMB)</b> |           |          |          |          | 0.000 |
| < 10,000                           | 34(17.4)  | 27(24.3) | 4(9.3)   | 3(6.2)   |       |
| 10,000 – 30,000                    | 106(54.4) | 57(51.4) | 35(81.4) | 14(29.1) |       |
| 30,000 – 50,000                    | 43(22.1)  | 16(14.4) | 4(9.3)   | 23(47.9) |       |
| 50,000 – 100,000                   | 9(4.6)    | 7(6.3)   | 0        | 2(4.2)   |       |
| 100,000 or higher                  | 3(1.5)    | 0        | 0        | 3(6.3)   |       |
| Missing                            | 7(3.5)    | 4(3.6)   | 0        | 3(6.3)   |       |
| <b>The need to do research</b>     |           |          |          |          | 0.000 |
| Yes                                | 88(44.9)  | 30(27.0) | 18(41.9) | 40(83.3) |       |
| No                                 | 108(55.1) | 77(69.3) | 25(58.2) | 6(6.3)   |       |
| Missing                            | 6(3.0)    | 4(3.6)   | 0        | 2(4.2)   |       |

### Workload and pay (Table 2)

Workload varied considerably with level of hospital. Provincial hospital doctors worked the longest hours, 60% routinely worked more than 60 hours per week with 23% working more than 30 hours per week in overtime (additional work hours and on a “forced voluntary” basis largely due to heavy workload). For county level doctors these figures were 47% and 9%, and primary level doctors reported 21% and 2%. Sixty-nine percent of provincial hospital doctors saw over 50 patients in clinic per day with 46% seeing over 100 patients a day. Thirty-five per cent of doctors at secondary

1  
2  
3 level facilities saw over 50 outpatients per day and 33% at the primary level. Not  
4  
5 surprisingly, consultation times were reported to be very short. Nearly 38% of  
6  
7 provincial hospital doctors spent 4 minutes or less on average for each outpatient.  
8  
9 These compared to 14% in county hospitals, and 7% in primary care. Ninety per cent  
10  
11 of doctors at the provincial hospital reported that they did on-call duties (which  
12  
13 usually involved being available on site overnight to deal with referrals and problems),  
14  
15 followed by the county level (81%) and primary level (48%). Eighty-seven percent of  
16  
17 provincial hospital doctors were required to do research in order to be eligible for  
18  
19 promotion. This compared to 42% and 28% in county level and primary care  
20  
21 respectively.  
22  
23  
24

25  
26 Remuneration consists of two parts: a basic salary and a bonus. For most doctors  
27  
28 (74%) their monthly salary was between 1, 000 and 3,000 RMB (1 USD = 6.16 RMB  
29  
30 in 2012), with only 1% paid more than 5,000 RMB per month and 29% paid between  
31  
32 3,000 and 5,000 RMB. Interestingly, 37% of county hospital doctors were paid less  
33  
34 than 1,000 RMB monthly and none of them earned over 3,000 RMB. But 19% and  
35  
36 17% respectively in primary care and tertiary hospitals were paid between 3,000 RMB  
37  
38 and 5,000 RMB. Up to 94% of junior doctors were paid 3,000 RMB or less, compared  
39  
40 to 77% middle ranked doctors and 65% of senior doctors. Annual bonuses, varied  
41  
42 mainly by the level of the hospital, 79% in primary care, 91% in secondary hospitals  
43  
44 and 38% in the tertiary hospital reported 30,000 RMB or less. Half (51%) in the  
45  
46 tertiary hospital received a bonus between 30,000 and 50,000, while only 15% and  
47  
48 9% respectively in primary and secondary hospitals earned this amount. Overall only  
49  
50 12 doctors (6%) reported 50,000 RMB or more; seven of these were primary care  
51  
52  
53  
54  
55  
56  
57  
58  
59  
60

1  
2  
3 doctors, five tertiary care doctors with none being county hospital doctors. Of those  
4  
5 who did overtime, more than 80% were not paid for it.  
6  
7

### 8 **Job satisfaction**

9  
10  
11 Doctors' satisfaction with various aspects of work and conditions is shown in Table 3.  
12  
13 Most striking are the differences between primary care practitioners and doctors in  
14  
15 higher-level hospitals (county and provincial hospitals). Very low proportions of  
16  
17 high-level hospital doctors were satisfied with their working conditions: only 7% at  
18  
19 high-level hospitals were satisfied with work hours, compared to 43% in primary care.  
20  
21 Percentages for satisfaction with basic salary were 3% and 27% respectively for  
22  
23 higher level and primary care. Similar variations in bonuses were reported (6% at  
24  
25 higher level versus 20% in primary care). Less than 10% at high levels were satisfied  
26  
27 with the amount of paid vacation time (3%), amount of paid sick leave (5%) and  
28  
29 opportunities for promotion (9%), with 38%, 41% and 25% respectively in primary  
30  
31 care. Interestingly, primary care doctors were most likely to feel they had high social  
32  
33 recognition (58%), compared with 29% at the provincial hospital and 23% at the  
34  
35 county hospitals. Work relationships showed high levels of satisfaction across all  
36  
37 health facilities. Levels of satisfaction with utilization of expertise, opportunity to  
38  
39 update expertise and support for training showed only small differences by level.  
40  
41  
42  
43  
44  
45  
46  
47  
48  
49  
50  
51  
52  
53  
54  
55  
56  
57  
58  
59  
60

Table 3 Doctors' job satisfaction by level of hospital (% of completely satisfied or satisfied)

| Items                                            | Satisfied<br>No (%) | 95% CIs of<br>percentages | Satisfied (%)        |                  |                      | p value<br>( $\chi^2$ tests) |
|--------------------------------------------------|---------------------|---------------------------|----------------------|------------------|----------------------|------------------------------|
|                                                  |                     |                           | By level of hospital |                  |                      |                              |
|                                                  |                     |                           | CHCs<br>(N=111)      | County<br>(N=43) | Provincial<br>(N=48) |                              |
| <b>Work schedule and job reward</b>              |                     |                           |                      |                  |                      |                              |
| Hours of work                                    | 52(25.7)            | 20.2 - 32.2               | 46(42.6)             | 2(4.7)           | 4(8.30)              | 0.000                        |
| Flexibility in scheduling                        | 47(23.3)            | 18.0 - 29.6               | 38(35.5)             | 5(11.6)          | 4(8.30)              | 0.000                        |
| Geographical location of work                    | 118(58.4)           | 51.5 - 65.0               | 68(63.0)             | 24(57.1)         | 26(54.2)             | 0.439                        |
| Basic salary                                     | 32(15.8)            | 11.5 - 21.5               | 29(27.4)             | 0(0.0)           | 3(6.3)               | 0.000                        |
| Bonus                                            | 26(12.9)            | 8.9 - 18.2                | 21(20.0)             | 3(7.0)           | 2(4.2)               | 0.000                        |
| Benefits (insurances, travelling etc.)           | 41(20.3)            | 15.3 - 26.4               | 32(30.2)             | 6(14.0)          | 3(6.3)               | 0.000                        |
| Amount of paid vacation time offered             | 43(21.3)            | 16.2 - 27.4               | 40(37.7)             | 1(2.3)           | 2(4.2)               | 0.000                        |
| Amount of paid sick leave offered                | 48(23.8)            | 18.4 - 30.1               | 43(41.0)             | 3(7.0)           | 2(4.2)               | 0.000                        |
| Opportunities for Promotion                      | 34(16.8)            | 12.3 - 22.6               | 26(24.5)             | 4(9.8)           | 4(8.7)               | 0.004                        |
| Job security                                     | 94(46.5)            | 39.8 - 53.4               | 55(50.9)             | 15(36.6)         | 24(51.1)             | 0.536                        |
| Recognition for work by supervisors/senior staff | 113(55.9)           | 49.1 - 62.6               | 65(60.2)             | 22(52.4)         | 26(55.3)             | 0.742                        |
| Recognition in society                           | 87(43.1)            | 36.4 - 50.0               | 63(58.3)             | 10(23.3)         | 14(29.2)             | 0.000                        |
| <b>Work relationships</b>                        |                     |                           |                      |                  |                      |                              |
| Relationships with co workers                    | 168(83.2)           | 77.4 - 87.7               | 96(88.1)             | 37(86.0)         | 35(72.9)             | 0.116                        |
| Relationship(s) with supervisor(s)               | 142(70.3)           | 63.7 - 76.2               | 79(75.2)             | 35(81.4)         | 28(59.6)             | 0.032                        |
| Relationships with subordinates                  | 150(74.3)           | 67.8 - 79.8               | 85(86.7)             | 32(80.0)         | 33(73.3)             | 0.247                        |
| Relationships with nurses                        | 168(83.2)           | 77.4 - 87.7               | 94(86.2)             | 38(88.4)         | 36(75.0)             | 0.271                        |

1  
2  
3  
4  
5  
6  
7  
8  
9  
10  
11  
12  
13  
14  
15  
16  
17  
18  
19  
20  
21  
22  
23  
24  
25  
26  
27  
28  
29  
30  
31  
32  
33  
34  
35  
36  
37  
38  
39  
40  
41  
42  
43  
44  
45  
46  
47  
48  
49

| <b>Use and update of professional knowledge</b>             |           |             |          |          |          |       |
|-------------------------------------------------------------|-----------|-------------|----------|----------|----------|-------|
| Opportunity to utilize your professional skills and talents | 105(52.0) | 45.1 - 58.8 | 60(56.1) | 21(48.8) | 24(51.1) | 0.938 |
| Opportunity to learn new skills and new knowledge           | 83(41.1)  | 34.5 - 48.0 | 42(38.9) | 16(37.2) | 25(52.1) | 0.573 |
| Support for training and education                          | 87(43.1)  | 36.4 - 50.0 | 49(47.6) | 19(44.2) | 19(39.6) | 0.914 |

For peer review only



### Patients' help seeking behaviours, demands and aggression (Table 4)

Across all levels of facilities doctors felt patients were becoming more demanding: 84% reported that patients often went to higher level hospitals for simple medical problems which could be solved at primary care facilities, 80% said that patients just want to get drugs or tests rather than medical advice. Across all levels of facilities doctors reported that patients were becoming more aggressive in their demands, with perceptions of high and increasing levels of complaints from patients, who are much more likely to sue than previously, with 87% reporting that there was an increasing trend of violence against doctors. County level doctors consistently reported higher levels for all these items.

Table 4 Patients' help seeking behaviours, demands and aggression by level of hospital (% of strongly agree or agree)

| Items                                                                                                                                            | Agree<br>No (%) | 95% CIs<br>of<br>percentage | Agree(percent)  |                  |                      | p value<br>( $\chi^2$ tests) |
|--------------------------------------------------------------------------------------------------------------------------------------------------|-----------------|-----------------------------|-----------------|------------------|----------------------|------------------------------|
|                                                                                                                                                  |                 |                             | CHCs<br>(N=111) | County<br>(N=43) | Provincial<br>(N=48) |                              |
| Patients often go to higher level hospitals (e.g. tertiary hospitals) with simple complaints which could be dealt with at a lower level hospital | 169(83.7)       | 78.0 - 88.1                 | 95(87.2)        | 35(81.4)         | 39(83.0)             | 0.790                        |
| Sometimes patients just want to get drugs and tests rather than really seeking medical advice from doctors                                       | 162(80.2)       | 74.2 - 85.1                 | 84(79.2)        | 38(88.4)         | 40(85.1)             | 0.631                        |
| Nowadays patients are better informed about their own medical conditions so that sometimes they demand specific treatments from doctors          | 168(83.2)       | 77.4 - 87.7                 | 93(86.9)        | 36(85.7)         | 39(83.0)             | 0.949                        |
| Patients are becoming more aggressive in their demands                                                                                           | 144(71.3)       | 64.7 - 77.1                 | 66(60.6)        | 40(93.0)         | 38(80.9)             | 0.001                        |
| The number of complaints by patients has increased in recent years                                                                               | 153(75.7)       | 69.4 - 81.1                 | 77(72.6)        | 41(95.3)         | 35(72.9)             | 0.006                        |
| Patients are becoming more likely to sue them even when doctors are trying to do their best                                                      | 176(87.1)       | 81.8 - 91.1                 | 93(87.7)        | 43(100.0)        | 40(83.3)             | 0.107                        |
| Violence against doctors by their own patients is increasing                                                                                     | 176(87.1)       | 81.8 - 91.1                 | 92(86.8)        | 43(100.0)        | 41(85.4)             | 0.126                        |

### Influencing factors of job satisfaction

Analysis of Covariance (ANCOVA) comparing job satisfaction scores among sub-groups, adjusted by gender, age and education, are presented in Table 5. Doctors in the provincial hospital appeared to be the most dissatisfied group, and primary care physicians were most satisfied with their work ( $p < 0.001$ ). Those who had worked longer hours ( $p < 0.001$ ), did longer overtime hours ( $p < 0.05$ ), took on-call duties ( $p < 0.01$ ) were more likely to be dissatisfied. Doctors who reported average consultation times of 10-20 minutes per patient and higher monthly salary showed higher satisfaction ( $p < 0.01$ ). Doctors who had more negative perceptions of the doctor-patient relationship (thought patients were more demanding and aggressive) also had lower satisfaction scores.

Table 5 Influencing factors of doctors' job satisfaction controlling for gender, age and education

| Variables                                       | Overall job satisfaction |      |          |
|-------------------------------------------------|--------------------------|------|----------|
|                                                 | Mean                     | SD   | p value* |
| <b>Level of hospital</b>                        |                          |      | 0.000    |
| Primary (CHCs and THCs)                         | 3.23                     | 0.06 |          |
| Secondary (county hospitals)                    | 2.83                     | 0.08 |          |
| Tertiary (provincial hospital)                  | 2.82                     | 0.09 |          |
| <b>Position rank</b>                            |                          |      | 0.064    |
| Low                                             | 3.12                     | 0.06 |          |
| Middle                                          | 2.91                     | 0.06 |          |
| High                                            | 2.97                     | 0.15 |          |
| <b>Work hours per week</b>                      |                          |      | 0.000    |
| <50                                             | 3.23                     | 0.06 |          |
| 50 or more                                      | 2.92                     | 0.05 |          |
| <b>Outpatient visits per doctor per day</b>     |                          |      | 0.102    |
| <50                                             | 3.14                     | 0.07 |          |
| 50 to 100                                       | 2.99                     | 0.07 |          |
| ≥100                                            | 2.85                     | 0.11 |          |
| Not applicable                                  | 3.12                     | 0.08 |          |
| <b>Average visit time per patient (minutes)</b> |                          |      | 0.004    |

|                                                                                                                                                  |      |      |       |
|--------------------------------------------------------------------------------------------------------------------------------------------------|------|------|-------|
| <10                                                                                                                                              | 2.92 | 0.05 |       |
| 10-20                                                                                                                                            | 3.23 | 0.08 |       |
| ≥20                                                                                                                                              | 2.97 | 0.25 |       |
| Not applicable                                                                                                                                   | 3.22 | 0.09 |       |
| <b>Overtime hours per week</b>                                                                                                                   |      |      | 0.020 |
| <10                                                                                                                                              | 3.15 | 0.05 |       |
| 10 to 30                                                                                                                                         | 2.95 | 0.06 |       |
| ≥ 30                                                                                                                                             | 2.83 | 0.13 |       |
| <b>On-call duties</b>                                                                                                                            |      |      | 0.001 |
| Yes                                                                                                                                              | 2.94 | 0.05 |       |
| No                                                                                                                                               | 3.26 | 0.08 |       |
| <b>Monthly salary</b>                                                                                                                            |      |      | 0.004 |
| <1,000 RMB                                                                                                                                       | 2.72 | 0.12 |       |
| 1,000-3,000 RMB                                                                                                                                  | 3.05 | 0.04 |       |
| ≥ 3,000 RMB                                                                                                                                      | 3.24 | 0.10 |       |
| <b>Patients' help seeking behaviours and aggression</b>                                                                                          |      |      |       |
| Patients often go to higher level hospitals (e.g. tertiary hospitals) with simple complaints which could be dealt with at a lower level hospital |      |      | 0.718 |
| Disagree                                                                                                                                         | 3.07 | 0.10 |       |
| Agree                                                                                                                                            | 3.04 | 0.04 |       |
| Sometimes patients just want to get drugs and tests rather than really seeking medical advice from doctors                                       |      |      | 0.040 |
| Disagree                                                                                                                                         | 3.22 | 0.09 |       |
| Agree                                                                                                                                            | 3.01 | 0.04 |       |
| Nowadays patients are better informed about their own medical conditions so that sometimes they demand specific treatments from doctors          |      |      | 0.586 |
| Disagree                                                                                                                                         | 2.99 | 0.11 |       |
| Agree                                                                                                                                            | 3.05 | 0.04 |       |
| Patients are becoming more aggressive in their demands                                                                                           |      |      | 0.008 |
| Disagree                                                                                                                                         | 3.22 | 0.08 |       |
| Agree                                                                                                                                            | 2.98 | 0.04 |       |
| Patients are becoming more likely to sue them even when doctors are trying to do their best                                                      |      |      | 0.532 |
| Disagree                                                                                                                                         | 3.12 | 0.13 |       |
| Agree                                                                                                                                            | 3.04 | 0.04 |       |
| The number of complaints by patients has increased in recent years                                                                               |      |      | 0.052 |
| Disagree                                                                                                                                         | 3.19 | 0.09 |       |
| Agree                                                                                                                                            | 3.00 | 0.04 |       |
| Violence against doctors by their own patients is increasing                                                                                     |      |      | 0.063 |
| Disagree                                                                                                                                         | 3.27 | 0.13 |       |
| Agree                                                                                                                                            | 3.02 | 0.04 |       |

\*p values for Analysis of Covariance (ANCOVA) controlling gender, age and education

1  
2  
3  
4  
5  
6 Finally, 88% (177) of the doctors said they would not want their children to be  
7 doctors. Of those 125 who provided a reason, 42 (34%) said poor pay, 22 (18%) said  
8 high pressure from work, and 21 (17%) said it was a high-risk profession. Eleven (9%)  
9 expressed concerns about personal insecurity or patient violence and conflicts, 11 (9%)  
10 cited the poor doctor patient relationship, and 17 (14%) stated low status and social  
11 recognition.  
12  
13  
14  
15  
16  
17  
18  
19

## 20 **DISCUSSION**

21  
22 This study provides some insights into the reasons for the low morale in the medical  
23 profession in China. Given perceived low status, high perceived risk of violence and  
24 increasing litigation, it is perhaps not surprising that job satisfaction is low and that  
25 the overwhelming majority of our sample (88%) do not want their children to be  
26 doctors. Concerns for the future of the medical profession, and threats to the health  
27 system are being voiced quite openly even by senior Chinese authorities.<sup>31</sup>  
28  
29  
30  
31  
32  
33  
34  
35  
36  
37

38 Our findings highlight the causes of low job satisfaction among doctors. They also  
39 show that despite being the best qualified, and having the highest status and the  
40 highest income, doctors at the provincial hospital were the most dissatisfied group,  
41 followed by county hospital doctors with primary care doctors the most satisfied. The  
42 causes of dissatisfaction fall into three main areas: low income, heavy workload and  
43 patient aggression. We will discuss these three factors and their together with the  
44 policy implications.  
45  
46  
47  
48  
49  
50  
51  
52  
53

### 54 **Income**

1  
2  
3 Low income is a major grievance, mirroring findings in previous studies.<sup>28 32</sup> Even at  
4  
5 provincial level, 80% earned an annual salary of 36,000 RMB or less. Among senior  
6  
7 doctors 35% earned more than this. This compared to the average annual income of  
8  
9 34,550 RMB in urban Zhejiang in 2012.<sup>33</sup> While bonuses increase this considerably  
10  
11 for some doctors, the overall income is still not regarded by most as sufficient  
12  
13 compensation for the long hours, and the risks incurred.  
14  
15

16  
17 To better remunerate doctors of course demands more resources, but government  
18  
19 investment in health remains insufficient. Total health expenditure remained under  
20  
21 5% of GDP before the health reforms in 2009 and saw a slight increase to 5.36% in  
22  
23 2012, compared to a GDP growth of 9.3% in 2011 and 7.8% in 2012.<sup>34 35</sup> This  
24  
25 compares with total health spending of around 10% of GDP in UK, Germany, France,  
26  
27 Norway, Canada, and Japan.<sup>36</sup> Government subsidy into these so-called public health  
28  
29 facilities, accounts for less than 10% of higher-level hospital revenue and 40% of  
30  
31 community health centre revenue.<sup>37 38</sup>  
32  
33  
34  
35

36 Fees for basic medical services, including doctors' consultation, nursing services and  
37  
38 surgical procedures, have been kept low ostensibly in order to ensure access to basic  
39  
40 care for all.<sup>39</sup> For example in Beijing<sup>40</sup>, a doctor consultation fee in an outpatient  
41  
42 department is 2.5 RMB at a community health centre and 4 RMB at a tertiary hospital.  
43  
44 The staff costs (surgeons, nurses, anaesthetists) for an appendectomy are 150 RMB.  
45  
46 These low costs are blamed in medical circles for the undervaluing medical  
47  
48 expertise.<sup>41</sup> Because these charges are kept low, facilities operate a market system,  
49  
50 making profits from prescribing drugs and tests. The health reforms were meant to  
51  
52 address the problem of perverse incentives, partly through the introduction of the zero  
53  
54 mark-up essential drug policy in 2009. The government started the policy in primary  
55  
56  
57  
58  
59  
60

1  
2  
3 care level and it is now being rolled-out in higher-level hospitals. With no mark-up  
4 from drugs now possible, the basic salary for the majority of doctors remains low.<sup>10</sup> A  
5 series of experimental initiatives aiming to augment doctors' income are being  
6 launched, such as pay-for-performance and raising prices of services, including  
7 consultation fees and procedures. But this may not fill the gap and doctors' income  
8 remains low. Some doctors are finding other ways to complement income. For  
9 example a shift is being seen towards prescribing more Traditional Chinese Medicine.

10  
11  
12  
13  
14  
15  
16  
17  
18  
19  
20 Appropriate measures to address effort-reward imbalance must be taken. First,  
21 increasing government funding to increase doctors' salary can help to attract and  
22 retain good doctors. Second, increasing charges for healthcare may be useful to  
23 increase hospital revenue, to reflect the value of doctors' expertise and to improve  
24 their self-value and morale. This increase should be covered by governmental  
25 insurance schemes. Third, involving doctors in proper evaluation and modifications of  
26 essential drug list policy is necessary, especially in deciding which drugs are on the  
27 list. There are known to be grievances about the content of the list and doctors want  
28 more autonomy in this regard.<sup>9</sup> Also, it is important to note the socioeconomic  
29 disparities across China. It is extremely difficult to prescribe a national strategy, and  
30 exploration of local policies tailored to local social-economic conditions is warranted.

### 31 32 33 34 35 36 37 38 39 40 41 42 43 44 45 **Workload**

46  
47  
48 | Long working hours appear to be a major contributor to dissatisfaction, especially at  
49 provincial and county hospitals. Here the huge volume of outpatients makes it  
50 difficult to spend sufficient time with patients, affecting quality of care and the  
51 doctor-patient relationship. With no gatekeeping systems in primary care, many  
52  
53  
54  
55  
56  
57  
58  
59  
60

1  
2  
3 patients bypass lower levels to go to where they think they will get the best care, that  
4 is, provincial level hospitals. Inappropriate use of higher level care was commented  
5 on by 84% of our respondents. The health reform measures taken to strengthen  
6 primary care aimed ~~were~~ partly to address this problem of massive overutilization of  
7 secondary and tertiary facilities for mostly minor conditions. But the reforms have  
8 probably made no difference.<sup>9</sup> This is because improvements in health insurance  
9 re-imburement have improved access, especially to higher-level facilities. Around  
10 96% of the population now have health insurance.<sup>42</sup> The outpatient throughput from  
11 2009 to 2012 increased by 50% from 303 million to 455 million.<sup>43</sup>  
12  
13  
14  
15  
16  
17  
18  
19  
20  
21  
22  
23

24 With 46% of all out-patient consultations occurring at county level and above in  
25 2012<sup>44</sup>, the sheer volume of out-patient visits necessitates a very short consultation,  
26 inevitably jeopardising the quality of care. The health reforms have failed to  
27 discourage patients from inappropriately using higher-level care for minor conditions  
28 and this was a major goal of the reforms.  
29  
30  
31  
32  
33

34  
35  
36 The discrepancy in workload and pressure between primary and higher level care  
37 partly explains the differences in job satisfaction. In primary care doctors are not  
38 subject to the same pressures of long working hours, short and rushed consultations,  
39 and often unpaid overtime. In addition, primary care doctors mainly manage patients  
40 who are not seriously ill, and hence are less likely to be the target of patient  
41 complaints or aggression.  
42  
43  
44  
45  
46  
47  
48  
49

50 To tackle the underlying problem of inappropriate use of higher level facilities, the  
51 primary care system needs to be further strengthened with the addition of a  
52 gate-keeping role. As we found in our study, primary care doctors have much lower  
53  
54  
55  
56  
57  
58  
59  
60



1  
2  
3 educational attainment, and this may contribute to the long standing mistrust among  
4  
5 the public. It has been 15 years since the introduction of community health services as  
6  
7 a new primary health care model in urban areas. Despite the increasing government  
8  
9 support, the general public still lack trust in these urban primary care physicians.<sup>45</sup>  
10  
11 The medical education curriculum needs to include more primary care and thus attract  
12  
13 more well-qualified doctors into primary care. This would help to reduce patient flow  
14  
15 to high level hospitals, and be far more cost-effective. However, the potential impact  
16  
17 of a gate-keeping policy on primary care is not clear. Although it would make  
18  
19 financial sense, a shift in workload to primary care may reduce job satisfaction for  
20  
21 doctors at this level, creating new problems. A number of ongoing pilots in limited  
22  
23 forms of gate-keeping<sup>46</sup>, may provide some insights into the effects on job satisfaction  
24  
25 across the three levels.  
26  
27  
28  
29  
30

### 31 **Patient aggression**

32  
33  
34 Patients' aggressive demands and violence are having a serious impact on doctors' job  
35  
36 satisfaction.<sup>11 47</sup> The situation is compounded by the fact that many of these violent  
37  
38 events take place not only with impunity of the legal authorities, but also with the  
39  
40 tolerance of the general public. In addition, while many receive scant media publicity,  
41  
42 the internet spreads news of these events rapidly and widely. This has bred fears and  
43  
44 insecurity, contributing to low morale in the profession.<sup>12</sup>  
45  
46  
47

48  
49 The causes of this patient aggression are complex. First, perverse incentives and  
50  
51 doctors' profit seeking behaviours have compromised quality of care, and led to  
52  
53 erosion of professional ethics and higher medical costs.<sup>48</sup> Certain areas of the media  
54  
55 have taken to criticising doctors for their "irresponsible and wrong" advice, and  
56  
57  
58  
59  
60

1  
2  
3 occasional cases of extremely high medical expenses, which make patients feel  
4 exploited.<sup>49</sup> In addition, patients are better informed about medical problems due to  
5 increasingly accessible health information, leading them to be more demanding.  
6  
7  
8

9  
10 Second, in a commoditized health care system, despite high coverage of medical  
11 insurance, patients are still paying a large portion of their medical expenses  
12 out-of-pocket.<sup>37</sup> Together with long waiting times and short consultation times, poor  
13 communication between doctors and patients can easily trigger tension between the  
14 two parties when doctors fail to meet patients' high expectations. Third, as doctors are  
15 the ones who dictate patient care, they are an easy target for patients' complaints and  
16 frustration.  
17  
18  
19  
20  
21  
22  
23  
24  
25

26  
27 Measures to prevent patient aggression against doctors are necessary. National  
28 measures to strengthen hospital security and criminalize any acts causing hospital  
29 disturbance were taken<sup>50</sup> soon after a doctor was killed by a 17 year-old patient in  
30 2012. But these have been poorly enforced and critics argue that this does not solve  
31 the underlying systemic issues. More radical solutions are needed to prevent violence  
32 in health facilities. Policies of 'zero tolerance' towards violence in healthcare sectors  
33 are recommended by the most influential medical associations in China.<sup>51</sup> [But the  
34 medical associations have no enforcement powers and are very rarely actually  
35 involved in medical disputes.](#) Education programs assisting doctors to prevent and  
36 manage patient violence may also be beneficial.<sup>52</sup> An emphasis on doctor-patient  
37 communication skills in [the](#) medical school syllabus may help improve the  
38 doctor-patient relationship, and reduce patient aggression.<sup>53</sup>  
39  
40  
41  
42  
43  
44  
45  
46  
47  
48  
49  
50  
51  
52  
53  
54

## 55 Limitations

56  
57  
58  
59  
60

1  
2  
3 The study has some limitations. First, we sampled only four cities and counties in the  
4  
5 province and only one provincial hospital. So ~~the generalizability of the results~~ have  
6  
7 limited generalisability. is questionable. The sample size was relatively small and  
8  
9 doctors' participation was voluntary, leading to potential bias. However, we did  
10  
11 sample across three levels of health institutions in four places, with different  
12  
13 economic levels. Second, as there are almost no studies on this topic, comparisons  
14  
15 could not be made. Thirdly, the job satisfaction score was developed for the paper and  
16  
17 has not been formally validated. Nevertheless, it enabled us to compare the job  
18  
19 satisfaction of doctors across different levels of hospital. But as a very first study  
20  
21 comparing job satisfaction at three levels of facility and exploring associated systemic  
22  
23 factors, we have provided a starting point for further research into exploring related  
24  
25 issues in China.  
26  
27  
28  
29

## 30 CONCLUSION

31  
32  
33  
34 Doctors in Zhejiang province, China, have low job satisfaction overall. Measures  
35  
36 must be taken to address this in order to ~~prevent a serious~~ address future problems of  
37  
38 recruitment and retention of doctors. ~~human resource crisis in the profession.~~ These :-  
39  
40 Urgent measures must include reduction of doctors' workload, especially at provincial  
41  
42 hospitals, increase in doctors' salary, and more punitive measures against individuals  
43  
44 who commit violent acts against doctors.  
45  
46  
47

## 48 Acknowledgements

49  
50  
51  
52 The authors gratefully acknowledge Professor Yu Hai and Professor Du Ya Ping, Yu  
53  
54 Di Di from School of Medicine, Zhejiang University, Mao Li Nan from Health  
55  
56 Bureau of Zhejiang province, Zhou Peng Cheng from Xiangya Hospital Central South  
57  
58  
59  
60

1  
2  
3 University for their help during questionnaire development and data collection, and  
4  
5 Professor Lam Tai Pong from the University of Hong Kong for his kind support  
6  
7 during manuscript preparation.  
8  
9

### 10 11 **Authors' contributions**

12  
13  
14 TH and DW designed the study and the questionnaire. DW carried out the survey.  
15  
16 KFL and YW performed the statistical analysis. DW, TH and YW interpreted the  
17  
18 analysis. DW and TH drafted the manuscript. All authors read and approved the final  
19  
20 manuscript.  
21  
22

### 23 24 **Funding**

25  
26  
27 This research received no specific grant from any funding agency in the public,  
28  
29 commercial or not-for-profit sectors  
30  
31

### 32 33 **Competing interests**

34  
35  
36 The authors declare that they have no competing interests.  
37  
38

### 39 40 **Ethical approvals**

41  
42  
43 The study is a student research project that has received ethical approval from the  
44  
45 UCL Research Ethics Committee.  
46  
47

### 48 49 **Data sharing statement**

50  
51  
52 No additional data are available.  
53  
54

### 55 56 **REFERENCES**

- 1  
2  
3 1. Li D, Yin W, Zhang X, et al. Investigation on turnover intention of medical staff in  
4 public hospitals and research of early-warning system's construction. *Chinese Journal*  
5 *of Hospital Administration* 2010;**26**(03):218-21.  
6  
7
- 8 2. National Health and Family Planning Commission PRC. *Research on relationship*  
9 *between Yi and Huan in China, 2008*: Center for Health Statistics and Information  
10 2008:P106.  
11
- 12 3. Wang ZG. *Worrying conditions of doctors' practising environment: 78% of the*  
13 *doctors do not want their children to be doctors 2013.*  
14 [http://news.china.com.cn/2013-10/27/content\\_30414901.htm](http://news.china.com.cn/2013-10/27/content_30414901.htm) (accessed 3 Mar 2014).  
15  
16
- 17 4. Shanghai Jiao Tong University. *Announcement of results of changing majors for*  
18 *students admitted in 2013.*  
19 <http://www.jwc.sjtu.edu.cn/web/sjtu/198015-1980000004584.htm> (accessed 27 May  
20 2014).  
21  
22
- 23 5. Flaherty JH, Liu ML, Ding L, et al. China: the aging giant. *J Am Geriatr Soc*  
24 2007;**55**(8):1295-300.  
25  
26
- 27 6. CDC US. *U.S. CDC IN CHINA: 2010-2011 Annual Report Healthy People in a*  
28 *Health China, 2013.*  
29  
30
- 31 7. Song K, Scott A, Sivey P, et al. Improving Chinese primary care providers'  
32 recruitment and retention: a discrete choice experiment. *Health Policy Plan* 2013.  
33  
34
- 35 8. China Daily. *WeChat poll revealed "90% of participants do not want children to be*  
36 *doctors: high pressure and intense doctor-patient conflicts are main reasons".*  
37 [http://www.chinadaily.com.cn/micro-reading/dzh/2014-04-23/content\\_11627822.html](http://www.chinadaily.com.cn/micro-reading/dzh/2014-04-23/content_11627822.html)  
38 (accessed 23 May 2014).  
39  
40
- 41 9. Zhou XD, Li L, Hesketh T. Health system reform in rural China: Voices of  
42 healthworkers and service-users. *Soc Sci Med* 2014;**117**:134-41.  
43  
44
- 45 10. Guan XD, Liang HG, Xue YJ, et al. An analysis of China's national essential  
46 medicines policy. *J Public Health Policy* 2011;**32**(3):305-19.  
47  
48
- 49 11. Zhang X, Sleeboom-Faulkner M. Tensions between medical professionals and  
50 patients in mainland China. *Camb Q Healthc Ethics* 2011;**20**(3):458.  
51  
52

- 1  
2  
3 12. Hesketh T, Wu D, Mao LN, et al. Violence against doctors in China. *Br Med J*  
4 2012;**345**.  
5  
6  
7 13. Wang ZG. *Yi Nao incidents increased by 7000 over last five years: illegal gangs*  
8 *made huge profits* 2012.  
9 [http://www.china.com.cn/news/2012-05/03/content\\_25287333\\_2.htm](http://www.china.com.cn/news/2012-05/03/content_25287333_2.htm) (accessed 23 Jul  
10 2014).  
11  
12  
13 14. Xiong C. *Medical malpractice and medical disputes*. Chinese Hospital  
14 Association Guide 2006.  
15  
16  
17 15. Wu SY, Zhu W, Li HY, et al. Workplace violence and influencing factors among  
18 medical professionals in China. *Am J Ind Med* 2012;**55**(11):1000-08.  
19  
20  
21 16. Ding Xiang Yuan. *Chinese Hospital Association: violence against doctors gets*  
22 *worse*. <http://vote.dxy.cn/report/dxy/id/57914> (accessed 28 Feb 2014).  
23  
24  
25  
26 17. BMA. *Violence at work: the experience of UK doctors*: Health Policy and  
27 Economic Research Unit, British Medical Association, 2003.  
28  
29  
30 18. Algwaiz WM, Alghanim SA. Violence exposure among health care professionals  
31 in Saudi public hospitals. A preliminary investigation. *Saudi Med J* 2012;**33**(1):76-82.  
32  
33  
34 19. Behnam M, Tillotson RD, Davis SM, et al. Violence in the emergency department:  
35 a national survey of emergency medicine residents and attending physicians. *J Emerg*  
36 *Med* 2011;**40**(5):565-79.  
37  
38  
39 20. Forrest LE, Herath PM, McRae IS, et al. A national survey of general  
40 practitioners' experiences of patient-initiated aggression in Australia. *Med J Aus*  
41 2011;**194**(11):605-08.  
42  
43  
44 21. Joa TS, Morken T. Violence towards personnel in out-of-hours primary care: a  
45 cross-sectional study. *Scand J Prim Health Care* 2012;**30**(1):55-60.  
46  
47  
48 22. Kowalenko T, Walters BL, Khare RK, et al. Workplace violence: a survey of  
49 emergency physicians in the state of Michigan. *Ann Emerg Med* 2005;**46**(2):142-47.  
50  
51  
52 23. Magnavita N, Heponiemi T. Violence towards health care workers in a Public  
53 Health Care Facility in Italy: a repeated cross-sectional study. *BMC Health Serv Res*  
54 2012;**12**(1):108.  
55  
56  
57  
58  
59  
60

- 1  
2  
3 24. Mirza NM, Amjad AI, Bhatti ABH, et al. Violence and abuse faced by junior  
4 physicians in the emergency department from patients and their caretakers: a  
5 nationwide study from Pakistan. *J Emerg Med* 2012;**42**(6):727-33.  
6  
7  
8 25. Saeki K, Okamoto N, Tomioka K, et al. Work-related aggression and violence  
9 committed by patients and its psychological influence on doctors. *J Occup Health*  
10 2011;**53**(5):356-64.  
11  
12  
13 26. Sibbald B, Bojke C, Gravelle H. National survey of job satisfaction and retirement  
14 intentions among general practitioners in England. *Br Med J* 2003;**326**(7379):22.  
15  
16  
17 27. Liu JA, Wang Q, Lu ZX. Job satisfaction and its modeling among township health  
18 center employees: a quantitative study in poor rural China. *BMC Health Serv Res*  
19 2010;**10**(1):115.  
20  
21  
22 28. Shi L, Song K, Rane S, et al. Factors associated with job satisfaction by Chinese  
23 primary care providers. *Prim Health Care Res Dev* 2014;**15**(01):46-57.  
24  
25  
26 29. Thakur M. Job satisfaction in banking: A study of private and public sector banks.  
27 *The IUP Journal of Bank Management* 2007;**6**(4):60-68.  
28  
29  
30 30. Buciniene I, Blazeviciene A, Bliudziute E. Health care reform and job  
31 satisfaction of primary health care physicians in Lithuania. *BMC Fam Pract*  
32 2005;**6**(1):10.  
33  
34  
35 31. Ren Min Wang PRC. *Liao Xin Bo: Improve doctors' dignity*.  
36 <http://www.people.com.cn/n/2014/0213/c347759-24348138.html> (accessed 23 May  
37 2014).  
38  
39  
40 32. Lim M-K, Yang H, Zhang T, et al. China's evolving health care market: how  
41 doctors feel and what they think. *Health Policy* 2004;**69**(3):329-37.  
42  
43  
44 33. Zhejiang Provincial Bureau of Statistics. *Statistical report on national economy*  
45 *and social development in Zhejiang Province, 2012*.  
46 [http://tjj.zj.gov.cn/tjgb/gmjjshfzgb/201302/t20130208\\_122162.html](http://tjj.zj.gov.cn/tjgb/gmjjshfzgb/201302/t20130208_122162.html) (accessed 21 Feb  
47 2014).  
48  
49  
50 34. The World Bank. *World Development Indicators: GDP growth (annual %)*.  
51 <http://data.worldbank.org/indicator/NY.GDP.MKTP.KD.ZG> (accessed 7 Apr 2014).  
52  
53  
54  
55  
56  
57  
58  
59  
60

- 1  
2  
3 35. National Health and Family Planning Commission PRC. *Health statistics in China, 2012*.  
4  
5 <http://www.moh.gov.cn/zwgkzt/ptjty/201206/55044/files/3ca7756121334b7a870a25ac79988f23.pdf> (accessed 7 Apr 2014).  
6  
7  
8
- 9 36. The World Bank. *Health expenditure, total (% of GDP) 2012*.  
10 <http://data.worldbank.org/indicator/SH.XPD.TOTL.ZS> (accessed 24 May 2014).  
11  
12
- 13 37. National Health and Family Planning Commission PRC. *China Health Statistics Yearbook 2013*.  
14  
15 <http://www.nhfpc.gov.cn/htmlfiles/zwgkzt/ptjnj/year2013/index2013.html> (accessed  
16 23 May 2014).  
17  
18
- 19 38. Ren YJ, Ji QY. Analysis of salary distribution system in public hospitals. *Journal of Shanghai Jiaotong University (Medical Science)* 2013;**33**(6).  
20  
21  
22
- 23 39. Yip W, Hsiao WC. The Chinese health system at a crossroads. *Health Aff*  
24 2008;**27**(2):460-68.  
25  
26  
27
- 28 40. Beijing Municipal Commission of Development and Reform. *Prices of medical services in Beijing*. <http://service2.bjpc.gov.cn/bjpc/mediprice/MedicalService1.jsp>  
29 (accessed 28 Apr 2014).  
30  
31  
32
- 33 41. Wang XH. *Zhong Nan Shan: Chinese doctors survive by selling drugs and the value of their expertise is not being reflected*.  
34 [http://news.xinhuanet.com/health/2014-03/06/c\\_126226620.htm](http://news.xinhuanet.com/health/2014-03/06/c_126226620.htm) (accessed 24 May  
35 2014).  
36  
37  
38
- 39 42. Meng Q, Xu L, Zhang Y, et al. Trends in access to health services and financial protection in China between 2003 and 2011: a cross-sectional study. *Lancet*  
40 2012;**379**(9818):805-14.  
41  
42  
43
- 44 43. Health Bureau of Zhejiang Province. *Health statistics in Zhejiang Province*.  
45 <http://www.zjwst.gov.cn/col/col320/index.html###> (accessed 31 Mar 2014 ).  
46  
47  
48
- 49 44. Health Bureau of Zhejiang Province. *Outpatient services in health facilities in Zhejiang Province, 2012*.  
50 [http://www.zjwst.gov.cn/art/2013/4/15/art\\_320\\_227356.html](http://www.zjwst.gov.cn/art/2013/4/15/art_320_227356.html) (accessed 31 Mar  
51 2014 ).  
52  
53  
54  
55  
56  
57  
58  
59  
60



- 1  
2  
3 45. Du J, Lu X, Wang Y, et al. Mutual referral: a survey of GPs in Beijing. *Fam Pract*  
4 2012;**29**(4):441-7.  
5  
6  
7 46. Jia L, Ze Yong F. Dilemma of Community First Contact Care. *Chinese General*  
8 *Practice* 2012;**15**(3A):720-22.  
9  
10  
11 47. Yao Y, Wang W, Wang F, et al. General self-efficacy and the effect of hospital  
12 workplace violence on doctors' stress and job satisfaction in China. *Int J Occup Med*  
13 *Environ Health* 2014;**27**(3):1-11.  
14  
15  
16 48. Yip WC-M, Hsiao W, Meng Q, et al. Realignment of incentives for health-care  
17 providers in China. *Lancet* 2010;**375**(9720):1120-30.  
18  
19  
20 49. Jie YX. *10 doctors calls for apologies from mass media about falsified reports*  
21 *2014*.  
22 <http://www.yxj.org.cn/news/yijieyaowen/shehuijiaodian/2014052109582936651.htm>  
23 (accessed 23 May 2014 ).  
24  
25  
26  
27 50. National Health and Family Planning Commission PRC. *The directive of*  
28 *maintaining order at medical institutions by Police Department, Ministry of Health*.  
29 <http://wsb.moh.gov.cn/zwgkzt/ptg/201204/54578.shtml> (accessed 11 Feb 2014).  
30  
31  
32 51. CMA. *United call for "Zero tolerance to medical violence" by Chinese Medical*  
33 *Association, Chinese Medical Doctor Association, Chinese Hospital Association and*  
34 *Chinese Health Law Society*.  
35 [http://www.cma.org.cn/index/xhdt/20131029/1383026180011\\_1.html](http://www.cma.org.cn/index/xhdt/20131029/1383026180011_1.html) (accessed 11  
36 Feb 2014).  
37  
38  
39 52. Zernike W, Sharpe P. Patient aggression in a general hospital setting: do nurses  
40 perceive it to be a problem? *Int J Nurs Pract* 1998;**4**(2):126-33.  
41  
42  
43 53. Ong LM, De Haes JC, Hoos AM, et al. Doctor-patient communication: a review  
44 of the literature. *Soc Sci Med* 1995;**40**(7):903-18.  
45  
46  
47  
48  
49  
50  
51  
52  
53  
54  
55  
56  
57  
58  
59  
60

**STROBE 2007 (v4) checklist of items to be included in reports of observational studies in epidemiology\***  
**Checklist for cohort, case-control, and cross-sectional studies (combined)**

| Section/Topic             | Item # | Recommendation                                                                                                                                                                                                                                                                                                                                                                                                                                                         | Reported on page # |
|---------------------------|--------|------------------------------------------------------------------------------------------------------------------------------------------------------------------------------------------------------------------------------------------------------------------------------------------------------------------------------------------------------------------------------------------------------------------------------------------------------------------------|--------------------|
| Title and abstract        | 1      | (a) Indicate the study’s design with a commonly used term in the title or the abstract                                                                                                                                                                                                                                                                                                                                                                                 | 1                  |
|                           |        | (b) Provide in the abstract an informative and balanced summary of what was done and what was found                                                                                                                                                                                                                                                                                                                                                                    | 2                  |
| <b>Introduction</b>       |        |                                                                                                                                                                                                                                                                                                                                                                                                                                                                        |                    |
| Background/rationale      | 2      | Explain the scientific background and rationale for the investigation being reported                                                                                                                                                                                                                                                                                                                                                                                   | 4–5                |
| Objectives                | 3      | State specific objectives, including any pre-specified hypotheses                                                                                                                                                                                                                                                                                                                                                                                                      | 6                  |
| <b>Methods</b>            |        |                                                                                                                                                                                                                                                                                                                                                                                                                                                                        |                    |
| Study design              | 4      | Present key elements of study design early in the paper                                                                                                                                                                                                                                                                                                                                                                                                                | 6                  |
| Setting                   | 5      | Describe the setting, locations, and relevant dates, including periods of recruitment, exposure, follow-up, and data collection                                                                                                                                                                                                                                                                                                                                        | 6–7                |
| Participants              | 6      | (a) <i>Cohort study</i> —Give the eligibility criteria, and the sources and methods of selection of participants. Describe methods of follow-up<br><i>Case-control study</i> —Give the eligibility criteria, and the sources and methods of case ascertainment and control selection. Give the rationale for the choice of cases and controls<br><i>Cross-sectional study</i> —Give the eligibility criteria, and the sources and methods of selection of participants | 6–7                |
|                           |        | (b) <i>Cohort study</i> —For matched studies, give matching criteria and number of exposed and unexposed<br><i>Case-control study</i> —For matched studies, give matching criteria and the number of controls per case                                                                                                                                                                                                                                                 | N/A                |
| Variables                 | 7      | Clearly define all outcomes, exposures, predictors, potential confounders, and effect modifiers. Give diagnostic criteria, if applicable                                                                                                                                                                                                                                                                                                                               | 7–8                |
| Data sources/ measurement | 8*     | For each variable of interest, give sources of data and details of methods of assessment (measurement). Describe comparability of assessment methods if there is more than one group                                                                                                                                                                                                                                                                                   | 8                  |
| Bias                      | 9      | Describe any efforts to address potential sources of bias                                                                                                                                                                                                                                                                                                                                                                                                              | N/A                |
| Study size                | 10     | Explain how the study size was arrived at                                                                                                                                                                                                                                                                                                                                                                                                                              | 6–7                |
| Quantitative variables    | 11     | Explain how quantitative variables were handled in the analyses. If applicable, describe which groupings were chosen and why                                                                                                                                                                                                                                                                                                                                           | 8                  |
| Statistical methods       | 12     | (a) Describe all statistical methods, including those used to control for confounding                                                                                                                                                                                                                                                                                                                                                                                  | 8                  |
|                           |        | (b) Describe any methods used to examine subgroups and interactions                                                                                                                                                                                                                                                                                                                                                                                                    | 8                  |
|                           |        | (c) Explain how missing data were addressed                                                                                                                                                                                                                                                                                                                                                                                                                            | N/A                |
|                           |        | (d) <i>Cohort study</i> —If applicable, explain how loss to follow-up was addressed<br><i>Case-control study</i> —If applicable, explain how matching of cases and controls was addressed                                                                                                                                                                                                                                                                              | N/A                |

|                          |     |                                                                                                                                                                                                              |       |
|--------------------------|-----|--------------------------------------------------------------------------------------------------------------------------------------------------------------------------------------------------------------|-------|
|                          |     | <i>Cross-sectional study</i> —If applicable, describe analytical methods taking account of sampling strategy                                                                                                 |       |
|                          |     | (e) Describe any sensitivity analyses                                                                                                                                                                        | N/A   |
| <b>Results</b>           |     |                                                                                                                                                                                                              |       |
| Participants             | 13* | (a) Report numbers of individuals at each stage of study—eg numbers potentially eligible, examined for eligibility, confirmed eligible, included in the study, completing follow-up, and analysed            | 8     |
|                          |     | (b) Give reasons for non-participation at each stage                                                                                                                                                         | N/A   |
|                          |     | (c) Consider use of a flow diagram                                                                                                                                                                           | N/A   |
| Descriptive data         | 14* | (a) Give characteristics of study participants (eg demographic, clinical, social) and information on exposures and potential confounders                                                                     | 8-11  |
|                          |     | (b) Indicate number of participants with missing data for each variable of interest                                                                                                                          | 9-10  |
|                          |     | (c) <i>Cohort study</i> —Summarise follow-up time (eg, average and total amount)                                                                                                                             | N/A   |
| Outcome data             | 15* | <i>Cohort study</i> —Report numbers of outcome events or summary measures over time                                                                                                                          | N/A   |
|                          |     | <i>Case-control study</i> —Report numbers in each exposure category, or summary measures of exposure                                                                                                         | N/A   |
|                          |     | <i>Cross-sectional study</i> —Report numbers of outcome events or summary measures                                                                                                                           | 13-14 |
| Main results             | 16  | (a) Give unadjusted estimates and, if applicable, confounder-adjusted estimates and their precision (eg, 95% confidence interval). Make clear which confounders were adjusted for and why they were included | 8-19  |
|                          |     | (b) Report category boundaries when continuous variables were categorized                                                                                                                                    | N/A   |
|                          |     | (c) If relevant, consider translating estimates of relative risk into absolute risk for a meaningful time period                                                                                             | N/A   |
| Other analyses           | 17  | Report other analyses done—eg analyses of subgroups and interactions, and sensitivity analyses                                                                                                               | 17-18 |
| <b>Discussion</b>        |     |                                                                                                                                                                                                              |       |
| Key results              | 18  | Summarise key results with reference to study objectives                                                                                                                                                     | 19    |
| Limitations              | 19  | Discuss limitations of the study, taking into account sources of potential bias or imprecision. Discuss both direction and magnitude of any potential bias                                                   | 24    |
| Interpretation           | 20  | Give a cautious overall interpretation of results considering objectives, limitations, multiplicity of analyses, results from similar studies, and other relevant evidence                                   | N/A   |
| Generalisability         | 21  | Discuss the generalisability (external validity) of the study results                                                                                                                                        | 24    |
| <b>Other information</b> |     |                                                                                                                                                                                                              |       |
| Funding                  | 22  | Give the source of funding and the role of the funders for the present study and, if applicable, for the original study on which the present article is based                                                | N/A   |

\*Give information separately for cases and controls in case-control studies and, if applicable, for exposed and unexposed groups in cohort and cross-sectional studies.

**Note:** An Explanation and Elaboration article discusses each checklist item and gives methodological background and published examples of transparent reporting. The STROBE checklist is best used in conjunction with this article (freely available on the Web sites of PLoS Medicine at <http://www.plosmedicine.org/>, Annals of Internal Medicine at <http://www.annals.org/>, and Epidemiology at <http://www.epidem.com/>). Information on the STROBE Initiative is available at [www.strobe-statement.org](http://www.strobe-statement.org).

# BMJ Open

## Health system reforms, violence against doctors and job satisfaction in the medical profession: a cross-sectional survey in Zhejiang Province, Eastern China

|                                 |                                                                                                                                                                                                                                                                                                                                                     |
|---------------------------------|-----------------------------------------------------------------------------------------------------------------------------------------------------------------------------------------------------------------------------------------------------------------------------------------------------------------------------------------------------|
| Journal:                        | <i>BMJ Open</i>                                                                                                                                                                                                                                                                                                                                     |
| Manuscript ID:                  | bmjopen-2014-006431.R2                                                                                                                                                                                                                                                                                                                              |
| Article Type:                   | Research                                                                                                                                                                                                                                                                                                                                            |
| Date Submitted by the Author:   | 02-Dec-2014                                                                                                                                                                                                                                                                                                                                         |
| Complete List of Authors:       | Hesketh, Therese; University College London, Institute of Global Health<br>Wu, Dan; The University of Hong Kong, Department of Family Medicine and Primary Care<br>Wang, Yun; The University of Hong Kong, Centre for Suicide Research and Prevention<br>Lam, Kwok Fai; The University of Hong Kong, Department of Statistics and Actuarial Science |
| <b>Primary Subject Heading</b>: | Health policy                                                                                                                                                                                                                                                                                                                                       |
| Secondary Subject Heading:      | Health policy, Health services research                                                                                                                                                                                                                                                                                                             |
| Keywords:                       | health reform, China, patient aggression, doctors, job satisfaction                                                                                                                                                                                                                                                                                 |
|                                 |                                                                                                                                                                                                                                                                                                                                                     |

SCHOLARONE™  
Manuscripts

1  
2  
3 **Health system reforms, violence against doctors and job satisfaction in the**  
4 **medical profession: a cross-sectional survey in Zhejiang Province, Eastern China**  
5  
6  
7

8 **Dan WU<sup>1</sup>, Yun WANG<sup>2</sup>, Kwok Fai LAM<sup>3</sup>, Therese HESKETH<sup>4,\*</sup>**  
9

10  
11 <sup>1</sup> Department of Family Medicine and Primary Care, Faculty of Medicine, The  
12 University of Hong Kong, Hong Kong  
13

14  
15  
16 <sup>2</sup> Centre for Suicide Research and Prevention, Faculty of Social Sciences, The  
17 University of Hong Kong, Hong Kong  
18

19  
20  
21 <sup>3</sup> Department of Statistics and Actuarial Science, Faculty of Science, The University  
22 of Hong Kong, Hong Kong  
23

24  
25  
26 <sup>4</sup> UCL Institute of Global Health, University College London  
27

28  
29 \*Correspondence to Professor Therese Hesketh, UCL Institute for Global Health, 30  
31 Guilford Street, London WC1N 1EH, UK; Email: [t.hesketh@ich.ucl.ac.uk](mailto:t.hesketh@ich.ucl.ac.uk);  
32

33  
34 Tel: +207-905-2253  
35

36  
37 **Keywords:** health reform, China, patient aggression, doctors, job satisfaction,  
38

39 Word count: 4106  
40

41 Number of tables and/or figures: 5  
42

43 Number of references: 55  
44

45 Checklist used for structuring the article: STROBE  
46  
47  
48  
49  
50  
51  
52  
53  
54  
55  
56  
57  
58  
59  
60

## Abstract

**Objective:** To explore the factors influencing doctors' job satisfaction and morale in China, in the context of the ongoing health system reforms and the deteriorating doctor-patient relationship

**Design:** Cross-sectional survey using self-completion questionnaires.

**Study setting:** The survey was conducted from March to May 2012 among doctors at provincial, county and primary care levels, in Zhejiang Province, China.

**Results:** The questionnaire was completed by 202 doctors. Factors which contributed most to low job satisfaction were low income and long working hours. Provincial level doctors were most dissatisfied while primary care doctors were the least dissatisfied. Three percent of doctors at high-level hospitals and 27% of those in primary care were satisfied with the salary. Only 7% at high-level hospitals were satisfied with work hours, compared to 43% in primary care. Less than 10% at high levels were satisfied with amount of paid vacation time (3%) and paid sick leave (5%), compared with 38% and 41% respectively in primary care.

Overall, 87% reported that patients were more likely to sue and that patient violence against doctors was increasing. Only 4.5% wanted their children to be doctors. Of those 125 who provided a reason, 34% said poor pay, 17% said it was a high-risk profession, and 9% expressed concerns about personal insecurity or patient violence.

**Conclusions:** Doctors have low job satisfaction overall. Recruitment and retention of doctors have become major challenges for the Chinese health system. Measures must be taken to address this, in order to ensure recruitment and retention of doctors in the

1  
2  
3 future. These measures must first include reduction of doctors' workload especially at  
4 provincial hospitals partly through incentivisation of appropriate utilisation of primary  
5 care, increase in doctors' salary and more effective measures to tackle patient violence  
6 against doctors.  
7  
8  
9  
10

### 11 12 13 14 15 16 **Strengths and limitations of this study**

- 17 • Our study is one of the first to investigate doctors' job satisfaction in China, since  
18 the instigation of the health reforms in 2009.
- 19 • We compared doctors' job satisfaction across three levels of health facility and  
20 explored associated systemic factors.
- 21 • Our study documents for the first time that increasing patient violence is a major  
22 contributor to doctors' low morale
- 23 • The generalizability of the study is constrained by the limited number of  
24 participating health facilities and the small sample size.  
25  
26  
27  
28  
29  
30  
31  
32  
33  
34  
35  
36  
37  
38  
39  
40  
41  
42  
43  
44  
45  
46  
47  
48  
49  
50  
51  
52  
53  
54  
55  
56  
57  
58  
59  
60

## INTRODUCTION

The Chinese medical profession is facing serious problems with recruitment and retention of doctors. Evidence from a number of sources illustrates low levels of morale in the profession. In a study of 933 doctors in 29 public hospitals in Shandong province, 49% said they intended to leave the profession.<sup>1</sup> Other studies have shown that only 24% of doctors would choose the profession if they had a second chance<sup>2</sup> and 78% would not want their own children to be doctors.<sup>3</sup> At Shanghai Jiao Tong University, which is among the top five in the country, 10% of the second year medical students transferred to other majors in 2013.<sup>4</sup> These worrying manifestations of discontent come at a time when more doctors are needed, given the pressures of an ageing population<sup>5</sup> and a growing non-communicable diseases burden.<sup>6</sup> Recruitment and retention of doctors have become major challenges for the health system in China.<sup>7</sup>

There is evidence that this situation is worsening<sup>8</sup>, so urgent measures are needed to reverse this trend. Clearly, such measures need to include addressing the underlying causes of this discontent. The aim of this study was to explore these underlying causes through surveying the views of doctors working at three levels of the health system: tertiary, secondary and primary care. Primary level facilities are supposed to provide preventive and basic medical services, while secondary and tertiary hospitals provide specialized care. The study was conducted in 2012, three years after the inception of major health system reforms, aiming to provide universal healthcare by 2020 with a focus on strengthening primary care. The reforms have also had impacts on doctors' working conditions: changes to health insurance have made healthcare more affordable at all levels, resulting in increased workload for doctors, especially at



1  
2  
3 secondary and tertiary level hospitals, even for minor illness. The introduction of an  
4 essential drug list for primary care, which aims to reduce perverse incentives for  
5 overprescribing to forbid profit on drugs, has reduced doctors' autonomy and reduced  
6 their income.<sup>9</sup> This loss of income from the mark-up in primary care has been  
7 replaced with a fixed salary and in some places a performance-based bonus, which in  
8 most cases is lower than previous earnings.<sup>10</sup>

9  
10  
11  
12  
13  
14  
15  
16  
17 Another important contributor to morale is a recent deterioration in the doctor-patient  
18 relationship.<sup>11</sup> The most extreme manifestation of this is a rise in levels of violence  
19 against health workers, along with damage and disturbance to health facilities. In  
20 China, this phenomenon is known as Yi Nao, which translates as (medical or hospital  
21 disturbance). This is usually caused by patients or their relatives as a reaction to what  
22 may be perceived, rightly or wrongly, as failures or mistakes by hospital staff.  
23 Sometimes the situation escalates with aggrieved patients and relatives hiring criminal  
24 gangs, prepared to go to extreme lengths, to threaten the hospital to provide  
25 compensation.<sup>12</sup> Yi Nao events are not rare. The Ministry of Health reported that the  
26 number of "major disturbances" involving physical violence nearly doubled from  
27 9,831 in 2006 to 17,243 in 2010.<sup>13</sup> In a 2006 study of 270 hospitals, over 70%  
28 reported that they had experienced Yi Nao incidents.<sup>14</sup> A study of 12 hospitals in 2009  
29 revealed that, of 2,464 medical professionals, 50% experienced workplace violence  
30 over the last 12 months, with 20% encountering physical abuse at least once.<sup>15</sup> A 2012  
31 survey conducted by the Chinese Hospital Association in 316 public hospitals in 30  
32 provinces revealed that the proportion of hospitals, which reported incidents of  
33 physical violence causing harm, had increased from 48% in 2008 to 64% in 2012. Of  
34 these, 8% of hospitals reported six or more incidents of physical violence every  
35  
36  
37  
38  
39  
40  
41  
42  
43  
44  
45  
46  
47  
48  
49  
50  
51  
52  
53  
54  
55  
56  
57  
58  
59  
60

1  
2  
3 year.<sup>16</sup> Violence against health personnel is not unique to China. It has been reported  
4  
5 from many other countries, including countries as diverse as the UK, US, Italy, Saudi  
6  
7 Arabia, Pakistan and Japan.<sup>17-25</sup> And many other countries are facing challenges with  
8  
9 the recruitment and retention of doctors.<sup>26</sup> Therefore, lessons from the Chinese  
10  
11 experience are relevant for other countries.  
12

13  
14  
15 The overall objectives of this study were: 1) to explore the factors influencing  
16  
17 doctors' job satisfaction and morale, with a special focus on the impacts of health  
18  
19 system reforms and the deteriorating doctor-patient relationship, and 2) to compare  
20  
21 doctors working at the three levels in the Chinese health system.  
22  
23

## 24 25 **METHODS**

### 26 27 28 **Sampling and data collection**

29  
30  
31 This cross-sectional survey was conducted from March to May 2012 in health  
32  
33 facilities in Zhejiang province, Eastern China. Zhejiang has a population of 55 million  
34  
35 and is ranked fourth in terms of GDP per capita among China's 33 provinces.  
36  
37

38  
39 A multi-stage stratified purposive sampling method was adopted (Table 1). We first  
40  
41 selected four cities or counties which represented high (Hangzhou and Yiwu), middle  
42  
43 (Anji) and low-level (Xianju) economic development in Zhejiang province. In the  
44  
45 second stage 10 health facilities were purposively sampled in the four cities/counties  
46  
47 to represent a range of health facilities: in urban areas a multi-specialism provincial  
48  
49 hospital (tertiary level) in Hangzhou, the main county hospitals (secondary level) in  
50  
51 Anji and Xianju respectively, and two community health centres/township health  
52  
53 centres (providers of primary care in urban and rural areas) in each city/county were  
54  
55  
56  
57  
58  
59  
60

invited to participate (one in Xianju county refused). In total, four community health centres (CHCs) in urban cities and three township health centres (THCs) in rural counties were selected based on their general representativeness in the city/county.

Table 1 Sampling strategy and achieved sample size by area

| Cities   | Income level  | Participating hospitals | Sample size | Total sample size |
|----------|---------------|-------------------------|-------------|-------------------|
| Hangzhou | High-income   | 1 provincial hospital   | 48          | 60                |
|          |               | 2 CHCs <sup>a</sup>     | 12          |                   |
| Yiwu     | High-income   | 2 CHCs                  | 54          | 54                |
| Anji     | Middle-income | 1 county hospital       | 24          | 41                |
|          |               | 2 THCs <sup>b</sup>     | 17          |                   |
| Xianju   | Low-income    | 1 county hospital       | 19          | 47                |
|          |               | 1 THC                   | 28          |                   |
| Total    |               | 10                      |             | 202               |

<sup>a</sup>CHCs: Community Health Centres

<sup>b</sup>THCs: Township Health Centres

At provincial level hospitals and county hospitals participants were internal medical doctors and surgeons, who were present in inpatient wards at the time of the survey.

At CHCs and THCs, primary care physicians present in clinics at the time of the survey were recruited.

Prospective participants were told that the questionnaire was about job satisfaction, that completion was voluntary, and that respondent anonymity and confidentiality would be strictly protected. Ethical approval was obtained from University College London. Local approvals were obtained from Zhejiang Health Bureau and local health authorities.

## Measurement methods

1  
2  
3 We developed the questionnaire based partly on existing questionnaires<sup>27-30</sup> with some  
4 items added and modified to specifically reflect the Chinese setting. Most questions  
5 used a five-point Likert scale ranging from 1 (not satisfied at all or strongly disagree)  
6 to 5 (extremely satisfied or strongly agree). The questionnaire included items about  
7 job satisfaction in general, perceptions about patients' health seeking behaviours and  
8 experience of patient aggression. Reverse scoring was used for questions phrased in  
9 the negative. The questionnaire was piloted, and modifications were made according  
10 to feedback.  
11  
12  
13  
14  
15  
16  
17  
18  
19

### 20 21 22 **Statistical analysis**

23  
24  
25 The data were analysed using IBM SPSS version 21. Comparisons between three  
26 levels of facility were conducted using Chi-square tests. We generated an overall job  
27 satisfaction score by computing the mean of 19 satisfaction items. The satisfaction  
28 score ranges from 1 (the lowest satisfaction) to 5 (the highest satisfaction). A higher  
29 score means higher satisfaction level. Analysis of Covariance (ANCOVA) was  
30 performed to compare satisfaction scores by level of response of associated factors  
31 controlling for gender, age and education.  
32  
33  
34  
35  
36  
37  
38  
39  
40

## 41 42 **RESULTS**

### 43 44 45 **Sample characteristics**

46  
47  
48 Characteristics of the study sample are shown in Table 2. Two hundred and two  
49 doctors completed questionnaires with a response rate of 81%. Forty-eight were from  
50 the provincial hospital, 43 from county hospitals, and 111 from primary care facilities.  
51  
52  
53 The mean age was 35.2 (SD=7.6), and 105 doctors were male, with 85 female. Only  
54  
55  
56  
57  
58  
59  
60

29% of primary care doctors had obtained a five-year formal medical education qualification compared with 93% and 96% at county and provincial level respectively.

Table 2 Characteristics of the sample and basic working conditions by level of hospital n (%)

|                                             | Total<br>N=202 | Level of hospital |                |                    | p value<br>( $\chi^2$ tests) |
|---------------------------------------------|----------------|-------------------|----------------|--------------------|------------------------------|
|                                             |                | CHCs<br>N=111     | County<br>N=43 | Provincial<br>N=48 |                              |
| <b>Age (mean and SD)</b>                    | 35.2(7.6)      | 36.1(8.6)         | 34.2(7.4)      | 34.0(4.1)          | 0.196                        |
| <b>Gender</b>                               |                |                   |                |                    | 0.001                        |
| Male                                        | 105(52.0)      | 45(40.5)          | 33(76.7)       | 27(56.3)           |                              |
| Female                                      | 85(42.1)       | 59(53.2)          | 10(23.3)       | 16(33.3)           |                              |
| Missing                                     | 12(5.9)        | 7(6.3)            | 0              | 5(10.4)            |                              |
| <b>Education level</b>                      |                |                   |                |                    | 0.000                        |
| Post-secondary level or less                | 78(38.6)       | 75(67.6)          | 3(7.0)         | 0(0)               |                              |
| Undergraduate or higher                     | 118(58.4)      | 32(28.8)          | 40(93.0)       | 46(95.8)           |                              |
| Missing                                     | 6(3.0)         | 4(3.6)            | 0              | 2(4.2)             |                              |
| <b>Position rank</b>                        |                |                   |                |                    | 0.001                        |
| Low                                         | 81(40.1)       | 51(45.9)          | 21(48.8)       | 9(18.8)            |                              |
| Middle                                      | 81(40.1)       | 36(32.4)          | 16(37.2)       | 29(60.4)           |                              |
| High                                        | 18(8.9)        | 4(3.6)            | 6(14.0)        | 8(16.7)            |                              |
| Missing                                     | 22(10.9)       | 20(18.0)          | 0              | 2(4.2)             |                              |
| <b>Work hours/week</b>                      |                |                   |                |                    | 0.000                        |
| < 40                                        | 16(8.2)        | 15(13.5)          | 0              | 1(2.1)             |                              |
| 40 to 50                                    | 60(30.6)       | 42(37.8)          | 13(30.2)       | 5(10.4)            |                              |
| 50 to 60                                    | 48(24.5)       | 27(24.3)          | 10(23.3)       | 11(22.9)           |                              |
| ≥ 60                                        | 72(36.7)       | 23(20.7)          | 20(46.5)       | 29(60.4)           |                              |
| Missing                                     | 6(3.0)         | 4(3.6)            | 0              | 2(4.2)             |                              |
| <b>Outpatient visits per doctor per day</b> |                |                   |                |                    | 0.000                        |
| < 50                                        | 67(33.2)       | 45(40.5)          | 17(39.5)       | 5(10.4)            |                              |
| 50 to 100                                   | 58(28.7)       | 34(30.6)          | 13(30.2)       | 11(22.9)           |                              |
| ≥100                                        | 27(13.4)       | 3(2.7)            | 2(4.7)         | 22(45.8)           |                              |
| Not applicable                              | 40(20.8)       | 24(21.6)          | 9(20.9)        | 7(14.6)            |                              |
| Missing                                     | 10(5.0)        | 5(4.5)            | 2(4.7)         | 3(6.3)             |                              |
| <b>Average visit time/patient (minutes)</b> |                |                   |                |                    | 0.001                        |
| ≤ 4                                         | 32(15.8)       | 8(7.2)            | 6(14.0)        | 18(37.5)           |                              |
| 5-9                                         | 83(41.1)       | 46(41.4)          | 21(48.8)       | 16(33.3)           |                              |
| 10-14                                       | 31(15.3)       | 18(16.2)          | 8(18.6)        | 5(10.4)            |                              |
| 15-20                                       | 10(5.0)        | 7(6.3)            | 1(2.3)         | 2(4.2)             |                              |
| ≥20                                         | 5(2.5)         | 4(3.6)            | 1(2.3)         | 0(0)               |                              |
| Not applicable                              | 33(16.3)       | 24(21.6)          | 4(9.3)         | 5(10.4)            |                              |

|                                    |           |          |          |          |       |
|------------------------------------|-----------|----------|----------|----------|-------|
| Missing                            | 8(4.0)    | 4(3.6)   | 2(4.7)   | 2(4.2)   |       |
| <b>Overtime hours per week</b>     |           |          |          |          | 0.000 |
| < 10                               | 103(51.0) | 69(62.2) | 23(53.5) | 11(22.9) |       |
| 10 to 30                           | 74(36.6)  | 35(31.5) | 15(34.9) | 24(50.0) |       |
| ≥ 30                               | 17(8.4)   | 2(1.8)   | 4(9.3)   | 11(22.9) |       |
| Missing                            | 8(4.0)    | 5(4.5)   | 1(2.3)   | 2(4.2)   |       |
| <b>On-call duties</b>              |           |          |          |          | 0.000 |
| Yes                                | 131(64.9) | 53(47.7) | 35(81.4) | 43(89.6) |       |
| No                                 | 61(30.2)  | 52(46.8) | 7(16.3)  | 2(4.2)   |       |
| Missing                            | 10(5.0)   | 6(5.4)   | 1(2.3)   | 3(6.2)   |       |
| <b>Monthly salary</b>              |           |          |          |          | 0.000 |
| < 1,000 RMB                        | 20(10.2)  | 2(1.8)   | 16(37.2) | 2(4.2)   |       |
| 1,000 – 3,000 RMB                  | 146(74.1) | 84(75.7) | 27(62.8) | 35(72.9) |       |
| 3,000 – 5,000 RMB                  | 29(14.7)  | 21(18.9) | 0        | 8(16.7)  |       |
| ≥ 5,000 RMB                        | 2(1.0)    | 1(0.9)   | 0        | 1(2.1)   |       |
| Missing                            | 5(2.5)    | 3(2.7)   | 0        | 2(4.2)   |       |
| <b>Total bonus last year (RMB)</b> |           |          |          |          | 0.000 |
| < 10,000                           | 34(17.4)  | 27(24.3) | 4(9.3)   | 3(6.2)   |       |
| 10,000 – 30,000                    | 106(54.4) | 57(51.4) | 35(81.4) | 14(29.1) |       |
| 30,000 – 50,000                    | 43(22.1)  | 16(14.4) | 4(9.3)   | 23(47.9) |       |
| 50,000 – 100,000                   | 9(4.6)    | 7(6.3)   | 0        | 2(4.2)   |       |
| 100,000 or higher                  | 3(1.5)    | 0        | 0        | 3(6.3)   |       |
| Missing                            | 7(3.5)    | 4(3.6)   | 0        | 3(6.3)   |       |
| <b>The need to do research</b>     |           |          |          |          | 0.000 |
| Yes                                | 88(44.9)  | 30(27.0) | 18(41.9) | 40(83.3) |       |
| No                                 | 108(55.1) | 77(69.3) | 25(58.2) | 6(6.3)   |       |
| Missing                            | 6(3.0)    | 4(3.6)   | 0        | 2(4.2)   |       |

### Workload and pay (Table 2)

Workload varied considerably with level of hospital. Provincial hospital doctors worked the longest hours, 60% routinely worked more than 60 hours per week with 23% working more than 30 hours per week in overtime (additional work hours and on a “forced voluntary” basis largely due to heavy workload). For county level doctors these figures were 47% and 9%, and primary level doctors reported 21% and 2%. Sixty-nine percent of provincial hospital doctors saw over 50 patients in clinic per day with 46% seeing over 100 patients a day. Thirty-five per cent of doctors at secondary level facilities saw over 50 outpatients per day and 33% at the primary level. Not

1  
2  
3 surprisingly, consultation times were reported to be very short. Nearly 38% of  
4 provincial hospital doctors spent 4 minutes or less on average for each outpatient.  
5  
6 These compared to 14% in county hospitals, and 7% in primary care. Ninety per cent  
7  
8 of doctors at the provincial hospital reported that they did on-call duties (which  
9  
10 usually involved being available on site overnight to deal with referrals and problems),  
11  
12 followed by the county level (81%) and primary level (48%). Eighty-seven percent of  
13  
14 provincial hospital doctors were required to do research in order to be eligible for  
15  
16 promotion. This compared to 42% and 28% in county level and primary care  
17  
18 respectively.  
19  
20  
21  
22  
23

24 Remuneration consists of two parts: a basic salary and a bonus. For most doctors  
25  
26 (74%) their monthly salary was between 1, 000 and 3,000 RMB (1 USD = 6.16 RMB  
27  
28 in 2012), with only 1% paid more than 5,000 RMB per month and 29% paid between  
29  
30 3,000 and 5,000 RMB. Interestingly, 37% of county hospital doctors were paid less  
31  
32 than 1,000 RMB monthly and none of them earned over 3,000 RMB. But 19% and  
33  
34 17% respectively in primary care and tertiary hospitals were paid between 3,000 RMB  
35  
36 and 5,000 RMB. Up to 94% of junior doctors were paid 3,000 RMB or less, compared  
37  
38 to 77% middle ranked doctors and 65% of senior doctors. Annual bonuses, varied  
39  
40 mainly by the level of the hospital, 79% in primary care, 91% in secondary hospitals  
41  
42 and 38% in the tertiary hospital reported 30,000 RMB or less. Half (51%) in the  
43  
44 tertiary hospital received a bonus between 30,000 and 50,000, while only 15% and  
45  
46 9% respectively in primary and secondary hospitals earned this amount. Overall only  
47  
48 12 doctors (6%) reported 50,000 RMB or more; seven of these were primary care  
49  
50 doctors, five tertiary care doctors with none being county hospital doctors. Of those  
51  
52 who did overtime, more than 80% were not paid for it.  
53  
54  
55  
56  
57  
58  
59  
60

## Job satisfaction

Doctors' satisfaction with various aspects of work and conditions is shown in Table 3. Most striking are the differences between primary care practitioners and doctors in higher-level hospitals (county and provincial hospitals). Very low proportions of high-level hospital doctors were satisfied with their working conditions: only 7% at high-level hospitals were satisfied with work hours, compared to 43% in primary care. Percentages for satisfaction with basic salary were 3% and 27% respectively for higher level and primary care. Similar variations in bonuses were reported (6% at higher level versus 20% in primary care). Less than 10% at high levels were satisfied with the amount of paid vacation time (3%), amount of paid sick leave (5%) and opportunities for promotion (9%), with 38%, 41% and 25% respectively in primary care. Interestingly, primary care doctors were most likely to feel they had high social recognition (58%), compared with 29% at the provincial hospital and 23% at the county hospitals. Work relationships showed high levels of satisfaction across all health facilities. Levels of satisfaction with utilization of expertise, opportunity to update expertise and support for training showed only small differences by level.



Table 3 Doctors' job satisfaction by level of hospital (% of completely satisfied or satisfied)

| Items                                            | Satisfied<br>No (%) | 95% CIs of<br>percentages | Satisfied (%)        |                  |                      | p value<br>( $\chi^2$ tests) |
|--------------------------------------------------|---------------------|---------------------------|----------------------|------------------|----------------------|------------------------------|
|                                                  |                     |                           | By level of hospital |                  |                      |                              |
|                                                  |                     |                           | CHCs<br>(N=111)      | County<br>(N=43) | Provincial<br>(N=48) |                              |
| <b>Work schedule and job reward</b>              |                     |                           |                      |                  |                      |                              |
| Hours of work                                    | 52(25.7)            | 20.2 - 32.2               | 46(42.6)             | 2(4.7)           | 4(8.30)              | 0.000                        |
| Flexibility in scheduling                        | 47(23.3)            | 18.0 - 29.6               | 38(35.5)             | 5(11.6)          | 4(8.30)              | 0.000                        |
| Geographical location of work                    | 118(58.4)           | 51.5 - 65.0               | 68(63.0)             | 24(57.1)         | 26(54.2)             | 0.439                        |
| Basic salary                                     | 32(15.8)            | 11.5 - 21.5               | 29(27.4)             | 0(0.0)           | 3(6.3)               | 0.000                        |
| Bonus                                            | 26(12.9)            | 8.9 - 18.2                | 21(20.0)             | 3(7.0)           | 2(4.2)               | 0.000                        |
| Benefits (insurances, travelling etc.)           | 41(20.3)            | 15.3 - 26.4               | 32(30.2)             | 6(14.0)          | 3(6.3)               | 0.000                        |
| Amount of paid vacation time offered             | 43(21.3)            | 16.2 - 27.4               | 40(37.7)             | 1(2.3)           | 2(4.2)               | 0.000                        |
| Amount of paid sick leave offered                | 48(23.8)            | 18.4 - 30.1               | 43(41.0)             | 3(7.0)           | 2(4.2)               | 0.000                        |
| Opportunities for Promotion                      | 34(16.8)            | 12.3 - 22.6               | 26(24.5)             | 4(9.8)           | 4(8.7)               | 0.004                        |
| Job security                                     | 94(46.5)            | 39.8 - 53.4               | 55(50.9)             | 15(36.6)         | 24(51.1)             | 0.536                        |
| Recognition for work by supervisors/senior staff | 113(55.9)           | 49.1 - 62.6               | 65(60.2)             | 22(52.4)         | 26(55.3)             | 0.742                        |
| Recognition in society                           | 87(43.1)            | 36.4 - 50.0               | 63(58.3)             | 10(23.3)         | 14(29.2)             | 0.000                        |
| <b>Work relationships</b>                        |                     |                           |                      |                  |                      |                              |
| Relationships with co workers                    | 168(83.2)           | 77.4 - 87.7               | 96(88.1)             | 37(86.0)         | 35(72.9)             | 0.116                        |
| Relationship(s) with supervisor(s)               | 142(70.3)           | 63.7 - 76.2               | 79(75.2)             | 35(81.4)         | 28(59.6)             | 0.032                        |
| Relationships with subordinates                  | 150(74.3)           | 67.8 - 79.8               | 85(86.7)             | 32(80.0)         | 33(73.3)             | 0.247                        |
| Relationships with nurses                        | 168(83.2)           | 77.4 - 87.7               | 94(86.2)             | 38(88.4)         | 36(75.0)             | 0.271                        |

---

**Use and update of professional knowledge**


---

|                                                             |           |             |          |          |          |       |
|-------------------------------------------------------------|-----------|-------------|----------|----------|----------|-------|
| Opportunity to utilize your professional skills and talents | 105(52.0) | 45.1 - 58.8 | 60(56.1) | 21(48.8) | 24(51.1) | 0.938 |
| Opportunity to learn new skills and new knowledge           | 83(41.1)  | 34.5 - 48.0 | 42(38.9) | 16(37.2) | 25(52.1) | 0.573 |
| Support for training and education                          | 87(43.1)  | 36.4 - 50.0 | 49(47.6) | 19(44.2) | 19(39.6) | 0.914 |

**Patients' help seeking behaviours, demands and aggression (Table 4)**

Across all levels of facilities doctors felt patients were becoming more demanding: 84% reported that patients often went to higher level hospitals for simple medical problems which could be solved at primary care facilities, 80% said that patients just want to get drugs or tests rather than medical advice. Across all levels of facilities doctors reported that patients were becoming more aggressive in their demands, with perceptions of high and increasing levels of complaints from patients, who are much more likely to sue than previously, with 87% reporting that there was an increasing trend of violence against doctors. County level doctors consistently reported higher levels for all these items.

Table 4 Patients' help seeking behaviours, demands and aggression by level of hospital (% of strongly agree or agree)

| Items                                                                                                                                            | Agree<br>No (%) | 95% CIs<br>of<br>percentage | Agree(percent)  |                  |                      | p value<br>( $\chi^2$ tests) |
|--------------------------------------------------------------------------------------------------------------------------------------------------|-----------------|-----------------------------|-----------------|------------------|----------------------|------------------------------|
|                                                                                                                                                  |                 |                             | CHCs<br>(N=111) | County<br>(N=43) | Provincial<br>(N=48) |                              |
| Patients often go to higher level hospitals (e.g. tertiary hospitals) with simple complaints which could be dealt with at a lower level hospital | 169(83.7)       | 78.0 - 88.1                 | 95(87.2)        | 35(81.4)         | 39(83.0)             | 0.790                        |
| Sometimes patients just want to get drugs and tests rather than really seeking medical advice from doctors                                       | 162(80.2)       | 74.2 - 85.1                 | 84(79.2)        | 38(88.4)         | 40(85.1)             | 0.631                        |
| Nowadays patients are better informed about their own medical conditions so that sometimes they demand specific treatments from doctors          | 168(83.2)       | 77.4 - 87.7                 | 93(86.9)        | 36(85.7)         | 39(83.0)             | 0.949                        |
| Patients are becoming more aggressive in their demands                                                                                           | 144(71.3)       | 64.7 - 77.1                 | 66(60.6)        | 40(93.0)         | 38(80.9)             | 0.001                        |
| The number of complaints by patients has increased in recent years                                                                               | 153(75.7)       | 69.4 - 81.1                 | 77(72.6)        | 41(95.3)         | 35(72.9)             | 0.006                        |
| Patients are becoming more likely to sue them even when doctors are trying to do their best                                                      | 176(87.1)       | 81.8 - 91.1                 | 93(87.7)        | 43(100.0)        | 40(83.3)             | 0.107                        |
| Violence against doctors by their own patients is increasing                                                                                     | 176(87.1)       | 81.8 - 91.1                 | 92(86.8)        | 43(100.0)        | 41(85.4)             | 0.126                        |

### Influencing factors of job satisfaction

Analysis of Covariance (ANCOVA) comparing job satisfaction scores among sub-groups, adjusted by gender, age and education, are presented in Table 5. Doctors in the provincial hospital appeared to be the most dissatisfied group, and primary care physicians were most satisfied with their work ( $p < 0.001$ ). Those who had worked longer hours ( $p < 0.001$ ), did longer overtime hours ( $p < 0.05$ ), took on-call duties ( $p < 0.01$ ) were more likely to be dissatisfied. Doctors who reported average consultation times of 10-20 minutes per patient and higher monthly salary showed higher satisfaction ( $p < 0.01$ ). Doctors who had more negative perceptions of the doctor-patient relationship (thought patients were more demanding and aggressive) also had lower satisfaction scores.

Table 5 Influencing factors of doctors' job satisfaction controlling for gender, age and education

| Variables                                       | Overall job satisfaction |      |          |
|-------------------------------------------------|--------------------------|------|----------|
|                                                 | Mean                     | SD   | p value* |
| <b>Level of hospital</b>                        |                          |      | 0.000    |
| Primary (CHCs and THCs)                         | 3.23                     | 0.06 |          |
| Secondary (county hospitals)                    | 2.83                     | 0.08 |          |
| Tertiary (provincial hospital)                  | 2.82                     | 0.09 |          |
| <b>Position rank</b>                            |                          |      | 0.064    |
| Low                                             | 3.12                     | 0.06 |          |
| Middle                                          | 2.91                     | 0.06 |          |
| High                                            | 2.97                     | 0.15 |          |
| <b>Work hours per week</b>                      |                          |      | 0.000    |
| <50                                             | 3.23                     | 0.06 |          |
| 50 or more                                      | 2.92                     | 0.05 |          |
| <b>Outpatient visits per doctor per day</b>     |                          |      | 0.102    |
| <50                                             | 3.14                     | 0.07 |          |
| 50to 100                                        | 2.99                     | 0.07 |          |
| ≥100                                            | 2.85                     | 0.11 |          |
| Not applicable                                  | 3.12                     | 0.08 |          |
| <b>Average visit time per patient (minutes)</b> |                          |      | 0.004    |

|                                                                                                                                                  |      |      |       |
|--------------------------------------------------------------------------------------------------------------------------------------------------|------|------|-------|
| <10                                                                                                                                              | 2.92 | 0.05 |       |
| 10-20                                                                                                                                            | 3.23 | 0.08 |       |
| ≥20                                                                                                                                              | 2.97 | 0.25 |       |
| Not applicable                                                                                                                                   | 3.22 | 0.09 |       |
| <b>Overtime hours per week</b>                                                                                                                   |      |      | 0.020 |
| <10                                                                                                                                              | 3.15 | 0.05 |       |
| 10 to 30                                                                                                                                         | 2.95 | 0.06 |       |
| ≥ 30                                                                                                                                             | 2.83 | 0.13 |       |
| <b>On-call duties</b>                                                                                                                            |      |      | 0.001 |
| Yes                                                                                                                                              | 2.94 | 0.05 |       |
| No                                                                                                                                               | 3.26 | 0.08 |       |
| <b>Monthly salary</b>                                                                                                                            |      |      | 0.004 |
| <1,000 RMB                                                                                                                                       | 2.72 | 0.12 |       |
| 1,000-3,000 RMB                                                                                                                                  | 3.05 | 0.04 |       |
| ≥ 3,000 RMB                                                                                                                                      | 3.24 | 0.10 |       |
| <b>Patients' help seeking behaviours and aggression</b>                                                                                          |      |      |       |
| Patients often go to higher level hospitals (e.g. tertiary hospitals) with simple complaints which could be dealt with at a lower level hospital |      |      | 0.718 |
| Disagree                                                                                                                                         | 3.07 | 0.10 |       |
| Agree                                                                                                                                            | 3.04 | 0.04 |       |
| Sometimes patients just want to get drugs and tests rather than really seeking medical advice from doctors                                       |      |      | 0.040 |
| Disagree                                                                                                                                         | 3.22 | 0.09 |       |
| Agree                                                                                                                                            | 3.01 | 0.04 |       |
| Nowadays patients are better informed about their own medical conditions so that sometimes they demand specific treatments from doctors          |      |      | 0.586 |
| Disagree                                                                                                                                         | 2.99 | 0.11 |       |
| Agree                                                                                                                                            | 3.05 | 0.04 |       |
| Patients are becoming more aggressive in their demands                                                                                           |      |      | 0.008 |
| Disagree                                                                                                                                         | 3.22 | 0.08 |       |
| Agree                                                                                                                                            | 2.98 | 0.04 |       |
| Patients are becoming more likely to sue them even when doctors are trying to do their best                                                      |      |      | 0.532 |
| Disagree                                                                                                                                         | 3.12 | 0.13 |       |
| Agree                                                                                                                                            | 3.04 | 0.04 |       |
| The number of complaints by patients has increased in recent years                                                                               |      |      | 0.052 |
| Disagree                                                                                                                                         | 3.19 | 0.09 |       |
| Agree                                                                                                                                            | 3.00 | 0.04 |       |
| Violence against doctors by their own patients is increasing                                                                                     |      |      | 0.063 |
| Disagree                                                                                                                                         | 3.27 | 0.13 |       |
| Agree                                                                                                                                            | 3.02 | 0.04 |       |

\*p values for Analysis of Covariance (ANCOVA) controlling gender, age and education

1  
2  
3  
4  
5  
6 Finally, 88% (177) of the doctors said they would not want their children to be  
7 doctors. Of those 125 who provided a reason, 42 (34%) said poor pay, 22 (18%) said  
8 high pressure from work, and 21 (17%) said it was a high-risk profession. Eleven (9%)  
9 expressed concerns about personal insecurity or patient violence and conflicts, 11 (9%)  
10 cited the poor doctor patient relationship, and 17 (14%) stated low status and social  
11 recognition.  
12  
13  
14  
15  
16  
17  
18  
19

## 20 **DISCUSSION**

21  
22 This study provides some insights into the reasons for the low morale in the medical  
23 profession in China. Given perceived low status, high perceived risk of violence and  
24 increasing litigation, it is perhaps not surprising that job satisfaction is low and that  
25 the overwhelming majority of our sample (88%) do not want their children to be  
26 doctors. Concerns for the future of the medical profession, and threats to the health  
27 system are being voiced quite openly even by senior Chinese authorities.<sup>31</sup>  
28  
29  
30  
31  
32  
33  
34  
35  
36  
37

38 Our findings highlight the causes of low job satisfaction among doctors. They also  
39 show that despite being the best qualified, and having the highest status and the  
40 highest income, doctors at the provincial hospital were the most dissatisfied group,  
41 followed by county hospital doctors with primary care doctors the most satisfied. The  
42 causes of dissatisfaction fall into three main areas: low income, heavy workload and  
43 patient aggression. We will discuss these three factors together with the policy  
44 implications.  
45  
46  
47  
48  
49  
50  
51  
52  
53

### 54 **Income**

1  
2  
3 Low income is a major grievance, mirroring findings in previous studies.<sup>28 32</sup> Even at  
4  
5 provincial level, 80% earned an annual salary of 36,000 RMB or less. Among senior  
6  
7 doctors 35% earned more than this. This compared to the average annual income of  
8  
9 34,550 RMB in urban Zhejiang in 2012.<sup>33</sup> While bonuses increase this considerably  
10  
11 for some doctors, the overall income is still not regarded by most as sufficient  
12  
13 compensation for the long hours, and the risks incurred.  
14  
15

16  
17 To better remunerate doctors of course demands more resources, but government  
18  
19 investment in health remains insufficient. Total health expenditure remained under  
20  
21 5% of GDP before the health reforms in 2009 and saw a slight increase to 5.36% in  
22  
23 2012, compared to a GDP growth of 9.3% in 2011 and 7.8% in 2012.<sup>34 35</sup> This  
24  
25 compares with total health spending of around 10% of GDP in UK, Germany, France,  
26  
27 Norway, Canada, and Japan.<sup>36</sup> Government subsidy into these so-called public health  
28  
29 facilities, accounts for less than 10% of higher-level hospital revenue and 40% of  
30  
31 community health centre revenue.<sup>37 38</sup>  
32  
33  
34  
35

36 Fees for basic medical services, including doctors' consultation, nursing services and  
37  
38 surgical procedures, have been kept low ostensibly in order to ensure access to basic  
39  
40 care for all.<sup>39</sup> For example in Beijing<sup>40</sup>, a doctor consultation fee in an outpatient  
41  
42 department is 2.5 RMB at a community health centre and 4 RMB at a tertiary hospital.  
43  
44 The staff costs (surgeons, nurses, anaesthetists) for an appendectomy are 150 RMB.  
45  
46 These low costs are blamed in medical circles for the undervaluing medical  
47  
48 expertise.<sup>41</sup> Because these charges are kept low, facilities operate a market system,  
49  
50 making profits from prescribing drugs and tests. The health reforms were meant to  
51  
52 address the problem of perverse incentives, partly through the introduction of the zero  
53  
54 mark-up essential drug policy in 2009. The government started the policy in primary  
55  
56  
57  
58  
59  
60



1  
2  
3 care level and it is now being rolled-out in higher-level hospitals. With no mark-up  
4 from drugs now possible, the basic salary for the majority of doctors remains low.<sup>10</sup> A  
5 series of experimental initiatives aiming to augment doctors' income are being  
6 launched, such as pay-for-performance and raising prices of services, including  
7 consultation fees and procedures. But this may not fill the gap and doctors' income  
8 remains low. Some doctors are finding other ways to complement income. For  
9 example a shift is being seen towards prescribing more Traditional Chinese Medicine.

10  
11  
12  
13  
14  
15  
16  
17  
18  
19  
20 Appropriate measures to address effort-reward imbalance must be taken. First,  
21 increasing government funding to increase doctors' salary can help to attract and  
22 retain good doctors. Second, increasing charges for healthcare may be useful to  
23 increase hospital revenue, to reflect the value of doctors' expertise and to improve  
24 their self-value and morale. This increase should be covered by governmental  
25 insurance schemes. Third, involving doctors in proper evaluation and modifications of  
26 essential drug list policy is necessary, especially in deciding which drugs are on the  
27 list. There are known to be grievances about the content of the list and doctors want  
28 more autonomy in this regard.<sup>9</sup> Also, it is important to note the socioeconomic  
29 disparities across China. It is extremely difficult to prescribe a national strategy, and  
30 exploration of local policies tailored to local social-economic conditions is warranted.  
31  
32  
33  
34  
35  
36  
37  
38  
39  
40  
41  
42  
43  
44

### 45 **Workload**

46  
47  
48 Long working hours appear to be a major contributor to dissatisfaction, especially at  
49 provincial and county hospitals. Here the huge volume of outpatients makes it  
50 difficult to spend sufficient time with patients, affecting quality of care and the  
51 doctor-patient relationship. With no gatekeeping systems in primary care, many  
52  
53  
54  
55  
56  
57  
58  
59  
60

1  
2  
3 patients bypass lower levels to go to where they think they will get the best care, that  
4 is, provincial level hospitals. Inappropriate use of higher level care was commented  
5 on by 84% of our respondents. The health reform measures taken to strengthen  
6 primary care aimed partly to address this problem of massive overutilization of  
7 secondary and tertiary facilities for mostly minor conditions. But the reforms have  
8 probably made no difference.<sup>9</sup> This is because improvements in health insurance  
9 re-imburement have improved access, especially to higher-level facilities. Around  
10 96% of the population now have health insurance.<sup>42</sup> The outpatient throughput from  
11 2009 to 2012 increased by 50% from 303 million to 455 million.<sup>43</sup>

22  
23  
24 With 46% of all out-patient consultations occurring at county level and above in  
25 2012<sup>44</sup>, the sheer volume of out-patient visits necessitates a very short consultation,  
26 inevitably jeopardising the quality of care. The health reforms have failed to  
27 discourage patients from inappropriately using higher-level care for minor conditions  
28 and this was a major goal of the reforms.

29  
30  
31 The discrepancy in workload and pressure between primary and higher level care  
32 partly explains the differences in job satisfaction. In primary care doctors are not  
33 subject to the same pressures of long working hours, short and rushed consultations,  
34 and often unpaid overtime. In addition, primary care doctors mainly manage patients  
35 who are not seriously ill, and hence are less likely to be the target of patient  
36 complaints or aggression. To tackle the underlying problem of inappropriate use of  
37 higher level facilities, the primary care system needs to be further strengthened with  
38 the addition of a gate-keeping role. As we found in our study, primary care doctors  
39 have much lower educational attainment, and this may contribute to the long standing  
40 mistrust among the public. It has been 15 years since the introduction of community  
41  
42  
43  
44  
45  
46  
47  
48  
49  
50  
51  
52  
53  
54  
55  
56  
57  
58  
59  
60

1  
2  
3 health services as a new primary health care model in urban areas. Despite the  
4  
5 increasing government support, the general public still lack trust in these urban  
6  
7 primary care physicians.<sup>45</sup> The medical education curriculum needs to include more  
8  
9 primary care and thus attract more well-qualified doctors into primary care. This  
10  
11 would help to reduce patient flow to high level hospitals, and be far more  
12  
13 cost-effective. However, the potential impact of a gate-keeping policy on primary care  
14  
15 is not clear. Although it would make financial sense, a shift in workload to primary  
16  
17 care may reduce job satisfaction for doctors at this level, creating new problems. A  
18  
19 number of ongoing pilots in limited forms of gate-keeping<sup>46</sup>, may provide some  
20  
21 insights into the effects on job satisfaction across the three levels.  
22  
23  
24  
25

### 26 **Patient aggression**

27  
28  
29 Patients' aggressive demands and violence are having a serious impact on doctors' job  
30  
31 satisfaction.<sup>11 47</sup> The situation is compounded by the fact that many of these violent  
32  
33 events take place not only with impunity of the legal authorities, but also with the  
34  
35 tolerance of the general public. In addition, while many receive scant media publicity,  
36  
37 the internet spreads news of these events rapidly and widely. This has bred fears and  
38  
39 insecurity, contributing to low morale in the profession.<sup>12</sup>  
40  
41  
42  
43

44  
45 The causes of this patient aggression are complex. First, perverse incentives and  
46  
47 doctors' profit seeking behaviours have compromised quality of care, and led to  
48  
49 erosion of professional ethics and higher medical costs.<sup>48</sup> Certain areas of the media  
50  
51 have taken to criticising doctors for their "irresponsible and wrong" advice, and  
52  
53 occasional cases of extremely high medical expenses, which make patients feel  
54  
55  
56  
57  
58  
59  
60

1  
2  
3 exploited.<sup>49</sup> In addition, patients are better informed about medical problems due to  
4  
5 increasingly accessible health information, leading them to be more demanding.  
6  
7

8  
9 Second, in a commoditized health care system, despite high coverage of medical  
10  
11 insurance, patients are still paying a large portion of their medical expenses  
12  
13 out-of-pocket.<sup>37</sup> Together with long waiting times and short consultation times, poor  
14  
15 communication between doctors and patients can easily trigger tension between the  
16  
17 two parties when doctors fail to meet patients' high expectations. Third, as doctors are  
18  
19 the ones who dictate patient care, they are an easy target for patients' complaints and  
20  
21 frustration.  
22  
23

24  
25 Measures to prevent patient aggression against doctors are necessary. National  
26  
27 measures to strengthen hospital security and criminalize any acts causing hospital  
28  
29 disturbance were taken<sup>50</sup> soon after a doctor was killed by a 17 year-old patient in  
30  
31 2012. But these have been poorly enforced and critics argue that this does not solve  
32  
33 the underlying systemic issues. More radical solutions are needed to prevent violence  
34  
35 in health facilities. Policies of 'zero tolerance' towards violence in healthcare sectors  
36  
37 are recommended by the most influential medical associations in China.<sup>51</sup> But the  
38  
39 medical associations have no enforcement powers and are very rarely actually  
40  
41 involved in medical disputes. Education programs assisting doctors to prevent and  
42  
43 manage patient violence may also be beneficial.<sup>52</sup> An emphasis on doctor-patient  
44  
45 communication skills in the medical school syllabus may help improve the  
46  
47 doctor-patient relationship, and reduce patient aggression.<sup>53</sup>  
48  
49  
50  
51

## 52 53 **Limitations**

54  
55  
56  
57  
58  
59  
60

1  
2  
3 The study has some limitations. First, we sampled only four cities and counties in the  
4 province and only one provincial hospital. So the results have limited generalisability.  
5  
6 The sample size was relatively small and doctors' participation was voluntary, leading  
7 to potential bias. However, we did sample across three levels of health institutions in  
8 four places, with different economic levels. Second, as there are almost no studies on  
9 this topic, comparisons could not be made. Thirdly, the job satisfaction score was  
10 developed for the paper and has not been formally validated. Nevertheless, it enabled  
11 us to compare the job satisfaction of doctors across different levels of hospital. But as  
12 a first study comparing job satisfaction at three levels of facility and exploring  
13 associated systemic factors, we have provided a starting point for further research into  
14 exploring related issues in China.  
15  
16  
17  
18  
19  
20  
21  
22  
23  
24  
25  
26

## 27 28 **CONCLUSION**

29  
30  
31 Doctors in Zhejiang province, China, have low job satisfaction overall. Measures  
32 must be taken to address this in order to address future problems of recruitment and  
33 retention of doctors. These measures must first include reduction of doctors' workload,  
34 especially at provincial hospitals partly through incentivisation of appropriate  
35 utilisation of primary care, increase in doctors' salary, and more punitive measures  
36 against individuals who commit violent acts against doctors. More research is needed  
37 to explore in depth the underlying causes of job satisfaction and discontent in Chinese  
38 doctors. There may be lessons from other countries and systems, where job  
39 satisfaction among doctors is generally high.<sup>54 55</sup>  
40  
41  
42  
43  
44  
45  
46  
47  
48  
49  
50  
51

## 52 **Acknowledgements**

1  
2  
3 The authors gratefully acknowledge Professor Yu Hai and Professor Du Ya Ping, Yu  
4 Di Di from School of Medicine, Zhejiang University, Mao Li Nan from Health  
5 Bureau of Zhejiang province, Zhou Peng Cheng from Xiangya Hospital Central South  
6 University for their help during questionnaire development and data collection, and  
7 Professor Lam Tai Pong from the University of Hong Kong for his kind support  
8 during manuscript preparation.  
9  
10  
11  
12  
13  
14

### 15 16 17 **Authors' contributions**

18  
19  
20 TH and DW designed the study and the questionnaire. DW carried out the survey.  
21  
22 KFL and YW performed the statistical analysis. DW, TH and YW interpreted the  
23 analysis. DW and TH drafted the manuscript. All authors read and approved the final  
24 manuscript.  
25  
26  
27  
28  
29

### 30 31 **Funding**

32  
33  
34 This research received no specific grant from any funding agency in the public,  
35 commercial or not-for-profit sectors  
36  
37  
38

### 39 40 **Competing interests**

41  
42  
43 The authors declare that they have no competing interests.  
44  
45

### 46 47 **Ethical approvals**

48  
49  
50 The study is a student research project that has received ethical approval from the  
51 UCL Research Ethics Committee.  
52  
53  
54

### 55 56 **Data sharing statement**

No additional data are available.

## REFERENCES

1. Li D, Yin W, Zhang X, et al. Investigation on turnover intention of medical staff in public hospitals and research of early-warning system's construction. *Chinese Journal of Hospital Administration* 2010;**26**(03):218-21.
2. National Health and Family Planning Commission PRC. *Research on relationship between Yi and Huan in China, 2008*: Center for Health Statistics and Information 2008:P106.
3. Wang ZG. *Worrying conditions of doctors' practising environment: 78% of the doctors do not want their children to be doctors 2013*. [http://news.china.com.cn/2013-10/27/content\\_30414901.htm](http://news.china.com.cn/2013-10/27/content_30414901.htm) (accessed 3 Mar 2014).
4. Shanghai Jiao Tong University. *Announcement of results of changing majors for students admitted in 2013*. <http://www.jwc.sjtu.edu.cn/web/sjtu/198015-1980000004584.htm> (accessed 27 May 2014).
5. Flaherty JH, Liu ML, Ding L, et al. China: the aging giant. *J Am Geriatr Soc* 2007;**55**(8):1295-300.
6. CDC US. *U.S. CDC IN CHINA: 2010-2011 Annual Report Healthy People in a Health China*, 2013.
7. Song K, Scott A, Sivey P, et al. Improving Chinese primary care providers' recruitment and retention: a discrete choice experiment. *Health Policy Plan* 2013.
8. China Daily. *WeChat poll revealed "90% of participants do not want children to be doctors: high pressure and intense doctor-patient conflicts are main reasons"*. [http://www.chinadaily.com.cn/micro-reading/dzh/2014-04-23/content\\_11627822.html](http://www.chinadaily.com.cn/micro-reading/dzh/2014-04-23/content_11627822.html) (accessed 23 May 2014).
9. Zhou XD, Li L, Hesketh T. Health system reform in rural China: Voices of healthworkers and service-users. *Soc Sci Med* 2014;**117**:134-41.
10. Guan XD, Liang HG, Xue YJ, et al. An analysis of China's national essential medicines policy. *J Public Health Policy* 2011;**32**(3):305-19.

- 1  
2  
3 11. Zhang X, Sleeboom-Faulkner M. Tensions between medical professionals and  
4 patients in mainland China. *Camb Q Healthc Ethics* 2011;**20**(3):458.  
5  
6  
7 12. Hesketh T, Wu D, Mao LN, et al. Violence against doctors in China. *Br Med J*  
8 2012;**345**.  
9  
10  
11 13. Wang ZG. *Yi Nao incidents increased by 7000 over last five years: illegal gangs*  
12 *made huge profits* 2012.  
13 [http://www.china.com.cn/news/2012-05/03/content\\_25287333\\_2.htm](http://www.china.com.cn/news/2012-05/03/content_25287333_2.htm) (accessed 23 Jul  
14 2014).  
15  
16  
17 14. Xiong C. *Medical malpractice and medical disputes*. Chinese Hospital  
18 Association Guide 2006.  
19  
20  
21 15. Wu SY, Zhu W, Li HY, et al. Workplace violence and influencing factors among  
22 medical professionals in China. *Am J Ind Med* 2012;**55**(11):1000-08.  
23  
24  
25 16. Ding Xiang Yuan. *Chinese Hospital Association: violence against doctors gets*  
26 *worse*. <http://vote.dxy.cn/report/dxy/id/57914> (accessed 28 Feb 2014).  
27  
28  
29 17. BMA. *Violence at work: the experience of UK doctors*: Health Policy and  
30 Economic Research Unit, British Medical Association, 2003.  
31  
32  
33 18. Algwaiz WM, Alghanim SA. Violence exposure among health care professionals  
34 in Saudi public hospitals. A preliminary investigation. *Saudi Med J* 2012;**33**(1):76-82.  
35  
36  
37 19. Behnam M, Tillotson RD, Davis SM, et al. Violence in the emergency department:  
38 a national survey of emergency medicine residents and attending physicians. *J Emerg*  
39 *Med* 2011;**40**(5):565-79.  
40  
41  
42 20. Forrest LE, Herath PM, McRae IS, et al. A national survey of general  
43 practitioners' experiences of patient-initiated aggression in Australia. *Med J Aus*  
44 2011;**194**(11):605-08.  
45  
46  
47 21. Joa TS, Morken T. Violence towards personnel in out-of-hours primary care: a  
48 cross-sectional study. *Scand J Prim Health Care* 2012;**30**(1):55-60.  
49  
50  
51 22. Kowalenko T, Walters BL, Khare RK, et al. Workplace violence: a survey of  
52 emergency physicians in the state of Michigan. *Ann Emerg Med* 2005;**46**(2):142-47.  
53  
54  
55  
56  
57  
58  
59  
60



- 1  
2  
3 23. Magnavita N, Heponiemi T. Violence towards health care workers in a Public  
4 Health Care Facility in Italy: a repeated cross-sectional study. *BMC Health Serv Res*  
5 2012;**12**(1):108.  
6  
7  
8 24. Mirza NM, Amjad AI, Bhatti ABH, et al. Violence and abuse faced by junior  
9 physicians in the emergency department from patients and their caretakers: a  
10 nationwide study from Pakistan. *J Emerg Med* 2012;**42**(6):727-33.  
11  
12  
13 25. Saeki K, Okamoto N, Tomioka K, et al. Work-related aggression and violence  
14 committed by patients and its psychological influence on doctors. *J Occup Health*  
15 2011;**53**(5):356-64.  
16  
17  
18 26. Sibbald B, Bojke C, Gravelle H. National survey of job satisfaction and retirement  
19 intentions among general practitioners in England. *Br Med J* 2003;**326**(7379):22.  
20  
21  
22  
23 27. Liu JA, Wang Q, Lu ZX. Job satisfaction and its modeling among township health  
24 center employees: a quantitative study in poor rural China. *BMC Health Serv Res*  
25 2010;**10**(1):115.  
26  
27  
28 28. Shi L, Song K, Rane S, et al. Factors associated with job satisfaction by Chinese  
29 primary care providers. *Prim Health Care Res Dev* 2014;**15**(01):46-57.  
30  
31  
32 29. Thakur M. Job satisfaction in banking: A study of private and public sector banks.  
33 *The IUP Journal of Bank Management* 2007;**6**(4):60-68.  
34  
35  
36 30. Buciuuniene I, Blazeviciene A, Bliudziute E. Health care reform and job  
37 satisfaction of primary health care physicians in Lithuania. *BMC Fam Pract*  
38 2005;**6**(1):10.  
39  
40  
41 31. Ren Min Wang PRC. *Liao Xin Bo: Improve doctors' dignity.*  
42 <http://www.people.com.cn/n/2014/0213/c347759-24348138.html> (accessed 23 May  
43 2014).  
44  
45  
46 32. Lim M-K, Yang H, Zhang T, et al. China's evolving health care market: how  
47 doctors feel and what they think. *Health Policy* 2004;**69**(3):329-37.  
48  
49  
50  
51 33. Zhejiang Provincial Bureau of Statistics. *Statistical report on national economy*  
52 *and social development in Zhejiang Province, 2012.*  
53 [http://tjj.zj.gov.cn/tjgb/gmjshfzgb/201302/t20130208\\_122162.html](http://tjj.zj.gov.cn/tjgb/gmjshfzgb/201302/t20130208_122162.html) (accessed 21 Feb  
54 2014).  
55  
56  
57  
58  
59  
60

- 1  
2  
3 34. The World Bank. *World Development Indicators: GDP growth (annual %)*.  
4 <http://data.worldbank.org/indicator/NY.GDP.MKTP.KD.ZG> (accessed 7 Apr 2014).  
5  
6  
7 35. National Health and Family Planning Commission PRC. *Health statistics in China,*  
8 *2012*.  
9 [http://www.moh.gov.cn/zwgkzt/ptjty/201206/55044/files/3ca7756121334b7a870a25a](http://www.moh.gov.cn/zwgkzt/ptjty/201206/55044/files/3ca7756121334b7a870a25ac79988f23.pdf)  
10 [c79988f23.pdf](http://www.moh.gov.cn/zwgkzt/ptjty/201206/55044/files/3ca7756121334b7a870a25ac79988f23.pdf) (accessed 7 Apr 2014).  
11  
12  
13 36. The World Bank. *Health expenditure, total (% of GDP) 2012*.  
14 <http://data.worldbank.org/indicator/SH.XPD.TOTL.ZS> (accessed 24 May 2014).  
15  
16  
17 37. National Health and Family Planning Commission PRC. *China Health Statistics*  
18 *Yearbook* 2013.  
19 <http://www.nhfpc.gov.cn/htmlfiles/zwgkzt/ptjnj/year2013/index2013.html> (accessed  
20 23 May 2014).  
21  
22  
23  
24 38. Ren YJ, Ji QY. Analysis of salary distribution system in public hospitals. *Journal*  
25 *of Shanghai Jiaotong University (Medical Science)* 2013;**33**(6).  
26  
27  
28 39. Yip W, Hsiao WC. The Chinese health system at a crossroads. *Health Aff*  
29 2008;**27**(2):460-68.  
30  
31  
32 40. Beijing Municipal Commission of Development and Reform. *Prices of medical*  
33 *services in Beijing*. <http://service2.bjpc.gov.cn/bjpc/mediprice/MedicalService1.jsp>  
34 (accessed 28 Apr 2014).  
35  
36  
37 41. Wang XH. *Zhong Nan Shan: Chinese doctors survive by selling drugs and the*  
38 *value of their expertise is not being reflected*.  
39 [http://news.xinhuanet.com/health/2014-03/06/c\\_126226620.htm](http://news.xinhuanet.com/health/2014-03/06/c_126226620.htm) (accessed 24 May  
40 2014).  
41  
42  
43 42. Meng Q, Xu L, Zhang Y, et al. Trends in access to health services and financial  
44 protection in China between 2003 and 2011: a cross-sectional study. *Lancet*  
45 2012;**379**(9818):805-14.  
46  
47  
48  
49 43. Health Bureau of Zhejiang Province. *Health statistics in Zhejiang Province*.  
50 <http://www.zjwst.gov.cn/col/col320/index.html###> (accessed 31 Mar 2014 ).  
51  
52  
53 44. Health Bureau of Zhejiang Province. *Outpatient services in health facilities in*  
54 *Zhejiang Province, 2012*.  
55  
56  
57  
58  
59  
60

1  
2  
3 [http://www.zjwst.gov.cn/art/2013/4/15/art\\_320\\_227356.html](http://www.zjwst.gov.cn/art/2013/4/15/art_320_227356.html) (accessed 31 Mar  
4 2014 ).

5  
6  
7 45. Du J, Lu X, Wang Y, et al. Mutual referral: a survey of GPs in Beijing. *Fam Pract*  
8 2012;**29**(4):441-7.

9  
10  
11 46. Jia L, Ze Yong F. Dilemma of Community First Contact Care. *Chinese General*  
12 *Practice* 2012;**15**(3A):720-22.

13  
14  
15 47. Yao Y, Wang W, Wang F, et al. General self-efficacy and the effect of hospital  
16 workplace violence on doctors' stress and job satisfaction in China. *Int J Occup Med*  
17 *Environ Health* 2014;**27**(3):1-11.

18  
19  
20 48. Yip WC-M, Hsiao W, Meng Q, et al. Realignment of incentives for health-care  
21 providers in China. *Lancet* 2010;**375**(9720):1120-30.

22  
23  
24 49. Jie YX. *10 doctors calls for apologies from mass media about falsified reports*  
25 *2014*.  
26 <http://www.yxj.org.cn/news/yijieyaowen/shehuijiaodian/2014052109582936651.htm>  
27 (accessed 23 May 2014 ).

28  
29  
30 50. National Health and Family Planning Commission PRC. *The directive of*  
31 *maintaining order at medical institutions by Police Department, Ministry of Health*.  
32 <http://wsb.moh.gov.cn/zwgkzt/ptg/201204/54578.shtml> (accessed 11 Feb 2014).

33  
34  
35 51. CMA. *United call for "Zero tolerance to medical violence" by Chinese Medical*  
36 *Association, Chinese Medical Doctor Association, Chinese Hospital Association and*  
37 *Chinese Health Law Society*.  
38 [http://www.cma.org.cn/index/xhdt/20131029/1383026180011\\_1.html](http://www.cma.org.cn/index/xhdt/20131029/1383026180011_1.html) (accessed 11  
39 Feb 2014).

40  
41  
42 52. Zernike W, Sharpe P. Patient aggression in a general hospital setting: do nurses  
43 perceive it to be a problem? *Int J Nurs Pract* 1998;**4**(2):126-33.

44  
45  
46 53. Ong LM, De Haes JC, Hoos AM, et al. Doctor-patient communication: a review  
47 of the literature. *Soc Sci Med* 1995;**40**(7):903-18.

48  
49  
50 54. Aasland OG, Rosta J, Nylenna M. Health care reforms and job satisfaction among  
51 doctors in Norway. *Scand J Public Health* 2010.

1  
2  
3 55. Voltmer E, Rosta J, Siegrist J, et al. Job stress and job satisfaction of physicians in  
4 private practice: comparison of German and Norwegian physicians. *Int Arch Occup*  
5 *Environ Health* 2012;**85**(7):819-28.  
6  
7  
8  
9  
10  
11  
12  
13  
14  
15  
16  
17  
18  
19  
20  
21  
22  
23  
24  
25  
26  
27  
28  
29  
30  
31  
32  
33  
34  
35  
36  
37  
38  
39  
40  
41  
42  
43  
44  
45  
46  
47  
48  
49  
50  
51  
52  
53  
54  
55  
56  
57  
58  
59  
60

For peer review only

1  
2  
3 **Health system reforms, violence against doctors and job satisfaction in the**  
4 **medical profession: a cross-sectional survey in Zhejiang Province, Eastern China**  
5  
6  
7

8 **Dan WU<sup>1</sup>, Yun WANG<sup>2</sup>, Kwok Fai LAM<sup>3</sup>, Therese HESKETH<sup>4,\*</sup>**  
9

10  
11 <sup>1</sup> Department of Family Medicine and Primary Care, Faculty of Medicine, The  
12 University of Hong Kong, Hong Kong  
13

14  
15  
16 <sup>2</sup> Centre for Suicide Research and Prevention, Faculty of Social Sciences, The  
17 University of Hong Kong, Hong Kong  
18

19  
20  
21 <sup>3</sup> Department of Statistics and Actuarial Science, Faculty of Science, The University  
22 of Hong Kong, Hong Kong  
23

24  
25  
26 <sup>4</sup> UCL Institute of Global Health, University College London  
27

28  
29 \*Correspondence to Professor Therese Hesketh, UCL Institute for Global Health, 30  
31 Guilford Street, London WC1N 1EH, UK; Email: [t.hesketh@ich.ucl.ac.uk](mailto:t.hesketh@ich.ucl.ac.uk);  
32

33  
34 Tel: +207-905-2253  
35

36  
37 **Keywords:** health reform, China, patient aggression, doctors, job satisfaction,  
38

39 | Word count: ~~4058~~ 4106  
40

41 | Number of tables and/or figures: 5  
42

43 | Number of references: ~~5355~~  
44

45 | Checklist used for structuring the article: STROBE  
46  
47  
48  
49  
50  
51  
52  
53  
54  
55  
56  
57  
58  
59  
60

## Abstract

**Objective:** To explore the factors influencing doctors' job satisfaction and morale in China, in the context of the ongoing health system reforms and the deteriorating doctor-patient relationship

**Design:** Cross-sectional survey using self-completion questionnaires.

**Study setting:** The survey was conducted from March to May 2012 among doctors at provincial, county and primary care levels, in Zhejiang Province, China.

**Results:** The questionnaire was completed by 202 doctors. Factors which contributed most to low job satisfaction were low income and long working hours. Provincial level doctors were most dissatisfied while primary care doctors were the least dissatisfied. Three percent of doctors at high-level hospitals and 27% of those in primary care were satisfied with the salary. Only 7% at high-level hospitals were satisfied with work hours, compared to 43% in primary care. Less than 10% at high levels were satisfied with amount of paid vacation time (3%) and paid sick leave (5%), compared with 38% and 41% respectively in primary care.

Overall, 87% reported that patients were more likely to sue and that patient violence against doctors was increasing. Only 4.5% wanted their children to be doctors. Of those 125 who provided a reason, 34% said poor pay, 17% said it was a high-risk profession, and 9% expressed concerns about personal insecurity or patient violence.

**Conclusions:** Doctors have low job satisfaction overall. Recruitment and retention of doctors have become major challenges for the Chinese health system. Measures must be taken to address this, in order to ensure recruitment and retention of doctors in the

1  
2  
3 future. These measures must first include reduction of doctors' workload especially at  
4 provincial hospitals partly through incentivisation of appropriate utilisation of primary  
5 care, increase in doctors' salary and more effective measures to tackle patient violence  
6  
7  
8  
9  
10 against doctors.

### 11 12 13 14 15 16 **Strengths and limitations of this study**

- 17  
18  
19 • Our study is one of the first to investigate doctors' job satisfaction in China, since  
20 the instigation of the health reforms in 2009.
- 21  
22  
23 • We compared doctors' job satisfaction across three levels of health facility and  
24 explored associated systemic factors.
- 25  
26  
27 • Our study documents for the first time that increasing patient violence is a major  
28 contributor to doctors' low morale
- 29  
30  
31 • The generalizability of the study is constrained by the limited number of  
32 participating health facilities and the small sample size.
- 33  
34  
35  
36  
37  
38  
39  
40  
41  
42  
43  
44  
45  
46  
47  
48  
49  
50  
51  
52  
53  
54  
55  
56  
57  
58  
59  
60

## INTRODUCTION

The Chinese medical profession is facing serious problems with recruitment and retention of doctors. Evidence from a number of sources illustrates low levels of morale in the profession. In a study of 933 doctors in 29 public hospitals in Shandong province, 49% said they intended to leave the profession.<sup>1</sup> Other studies have shown that only 24% of doctors would choose the profession if they had a second chance<sup>2</sup> and 78% would not want their own children to be doctors.<sup>3</sup> At Shanghai Jiao Tong University, which is among the top five in the country, 10% of the second year medical students transferred to other majors in 2013.<sup>4</sup> These worrying manifestations of discontent come at a time when more doctors are needed, given the pressures of an ageing population<sup>5</sup> and a growing non-communicable diseases burden.<sup>6</sup> Recruitment and retention of doctors have become major challenges for the health system in China.<sup>7</sup>

There is evidence that this situation is worsening<sup>8</sup>, so urgent measures are needed to reverse this trend. Clearly, such measures need to include addressing the underlying causes of this discontent. The aim of this study was to explore these underlying causes through surveying the views of doctors working at three levels of the health system: tertiary, secondary and primary care. Primary level facilities are supposed to provide preventive and basic medical services, while secondary and tertiary hospitals provide specialized care. The study was conducted in 2012, three years after the inception of major health system reforms, aiming to provide universal healthcare by 2020 with a focus on strengthening primary care. The reforms have also had impacts on doctors' working conditions: changes to health insurance have made healthcare more affordable at all levels, resulting in increased workload for doctors, especially at



1  
2  
3 secondary and tertiary level hospitals, even for minor illness. The introduction of an  
4 essential drug list for primary care, which aims to reduce perverse incentives for  
5 overprescribing to forbid profit on drugs, has reduced doctors' autonomy and reduced  
6 their income.<sup>9</sup> This loss of income from the mark-up in primary care has been  
7 replaced with a fixed salary and in some places a performance-based bonus, which in  
8 most cases is lower than previous earnings.<sup>10</sup>

9  
10  
11  
12  
13  
14  
15  
16  
17 Another important contributor to morale is a recent deterioration in the doctor-patient  
18 relationship.<sup>11</sup> The most extreme manifestation of this is a rise in levels of violence  
19 against health workers, along with damage and disturbance to health facilities. In  
20 China, this phenomenon is known as Yi Nao, which translates as (medical or hospital  
21 disturbance). This is usually caused by patients or their relatives as a reaction to what  
22 may be perceived, rightly or wrongly, as failures or mistakes by hospital staff.  
23 Sometimes the situation escalates with aggrieved patients and relatives hiring criminal  
24 gangs, prepared to go to extreme lengths, to threaten the hospital to provide  
25 compensation.<sup>12</sup> Yi Nao events are not rare. The Ministry of Health reported that the  
26 number of "major disturbances" involving physical violence nearly doubled from  
27 9,831 in 2006 to 17,243 in 2010.<sup>13</sup> In a 2006 study of 270 hospitals, over 70%  
28 reported that they had experienced Yi Nao incidents.<sup>14</sup> A study of 12 hospitals in 2009  
29 revealed that, of 2,464 medical professionals, 50% experienced workplace violence  
30 over the last 12 months, with 20% encountering physical abuse at least once.<sup>15</sup> A 2012  
31 survey conducted by the Chinese Hospital Association in 316 public hospitals in 30  
32 provinces revealed that the proportion of hospitals, which reported incidents of  
33 physical violence causing harm, had increased from 48% in 2008 to 64% in 2012. Of  
34 these, 8% of hospitals reported six or more incidents of physical violence every  
35  
36  
37  
38  
39  
40  
41  
42  
43  
44  
45  
46  
47  
48  
49  
50  
51  
52  
53  
54  
55  
56  
57  
58  
59  
60

1  
2  
3 year.<sup>16</sup> Violence against health personnel is not unique to China. It has been reported  
4  
5 from many other countries, including countries as diverse as the UK, US, Italy, Saudi  
6  
7 Arabia, Pakistan and Japan.<sup>17-25</sup> And many other countries are facing challenges with  
8  
9 the recruitment and retention of doctors.<sup>26</sup> Therefore, lessons from the Chinese  
10  
11 experience are relevant for other countries.  
12

13  
14  
15 The overall objectives of this study were: 1) to explore the factors influencing  
16  
17 doctors' job satisfaction and morale, with a special focus on the impacts of health  
18  
19 system reforms and the deteriorating doctor-patient relationship, and 2) to compare  
20  
21 doctors working at the three levels in the Chinese health system.  
22  
23

## 24 25 **METHODS**

### 26 27 28 **Sampling and data collection**

29  
30  
31 This cross-sectional survey was conducted from March to May 2012 in health  
32  
33 facilities in Zhejiang province, Eastern China. Zhejiang has a population of 55 million  
34  
35 and is ranked fourth in terms of GDP per capita among China's 33 provinces.  
36  
37

38  
39 A multi-stage stratified purposive sampling method was adopted (Table 1). We first  
40  
41 selected four cities or counties which represented high (Hangzhou and Yiwu), middle  
42  
43 (Anji) and low-level (Xianju) economic development in Zhejiang province. In the  
44  
45 second stage 10 health facilities were purposively sampled in the four cities/counties  
46  
47 to represent a range of health facilities: in urban areas a multi-specialism provincial  
48  
49 hospital (tertiary level) in Hangzhou, the main county hospitals (secondary level) in  
50  
51 Anji and Xianju respectively, and two community health centres/township health  
52  
53 centres (providers of primary care in urban and rural areas) in each city/county were  
54  
55  
56  
57  
58  
59  
60

invited to participate (one in Xianju county refused). In total, four community health centres (CHCs) in urban cities and three township health centres (THCs) in rural counties were selected based on their general representativeness in the city/county.

Table 1 Sampling strategy and achieved sample size by area

| Cities   | Income level  | Participating hospitals | Sample size | Total sample size |
|----------|---------------|-------------------------|-------------|-------------------|
| Hangzhou | High-income   | 1 provincial hospital   | 48          | 60                |
|          |               | 2 CHCs <sup>a</sup>     | 12          |                   |
| Yiwu     | High-income   | 2 CHCs                  | 54          | 54                |
| Anji     | Middle-income | 1 county hospital       | 24          | 41                |
|          |               | 2 THCs <sup>b</sup>     | 17          |                   |
| Xianju   | Low-income    | 1 county hospital       | 19          | 47                |
|          |               | 1 THC                   | 28          |                   |
| Total    |               | 10                      |             | 202               |

<sup>a</sup>CHCs: Community Health Centres

<sup>b</sup>THCs: Township Health Centres

At provincial level hospitals and county hospitals participants were internal medical doctors and surgeons, who were present in inpatient wards at the time of the survey.

At CHCs and THCs, primary care physicians present in clinics at the time of the survey were recruited.

Prospective participants were told that the questionnaire was about job satisfaction, that completion was voluntary, and that respondent anonymity and confidentiality would be strictly protected. Ethical approval was obtained from University College London. Local approvals were obtained from Zhejiang Health Bureau and local health authorities.

## Measurement methods

1  
2  
3 We developed the questionnaire based partly on existing questionnaires<sup>27-30</sup> with some  
4 items added and modified to specifically reflect the Chinese setting. Most questions  
5 used a five-point Likert scale ranging from 1 (not satisfied at all or strongly disagree)  
6 to 5 (extremely satisfied or strongly agree). The questionnaire included items about  
7 job satisfaction in general, perceptions about patients' health seeking behaviours and  
8 experience of patient aggression. Reverse scoring was used for questions phrased in  
9 the negative. The questionnaire was piloted, and modifications were made according  
10 to feedback.  
11  
12  
13  
14  
15  
16  
17  
18  
19

### 20 21 22 **Statistical analysis**

23  
24  
25 The data were analysed using IBM SPSS version 21. Comparisons between three  
26 levels of facility were conducted using Chi-square tests. We generated an overall job  
27 satisfaction score by computing the mean of 19 satisfaction items. The satisfaction  
28 score ranges from 1 (the lowest satisfaction) to 5 (the highest satisfaction). A higher  
29 score means higher satisfaction level. Analysis of Covariance (ANCOVA) was  
30 performed to compare satisfaction scores by level of response of associated factors  
31 controlling for gender, age and education.  
32  
33  
34  
35  
36  
37  
38  
39  
40

## 41 42 **RESULTS**

### 43 44 45 **Sample characteristics**

46  
47  
48 Characteristics of the study sample are shown in Table 2. Two hundred and two  
49 doctors completed questionnaires with a response rate of 81%. Forty-eight were from  
50 the provincial hospital, 43 from county hospitals, and 111 from primary care facilities.  
51  
52  
53 The mean age was 35.2 (SD=7.6), and 105 doctors were male, with 85 female. Only  
54  
55  
56  
57  
58  
59  
60

29% of primary care doctors had obtained a five-year formal medical education qualification compared with 93% and 96% at county and provincial level respectively.

Table 2 Characteristics of the sample and basic working conditions by level of hospital n (%)

|                                             | Total<br>N=202 | Level of hospital |                |                    | p value<br>( $\chi^2$ tests) |
|---------------------------------------------|----------------|-------------------|----------------|--------------------|------------------------------|
|                                             |                | CHCs<br>N=111     | County<br>N=43 | Provincial<br>N=48 |                              |
| <b>Age (mean and SD)</b>                    | 35.2(7.6)      | 36.1(8.6)         | 34.2(7.4)      | 34.0(4.1)          | 0.196                        |
| <b>Gender</b>                               |                |                   |                |                    | 0.001                        |
| Male                                        | 105(52.0)      | 45(40.5)          | 33(76.7)       | 27(56.3)           |                              |
| Female                                      | 85(42.1)       | 59(53.2)          | 10(23.3)       | 16(33.3)           |                              |
| Missing                                     | 12(5.9)        | 7(6.3)            | 0              | 5(10.4)            |                              |
| <b>Education level</b>                      |                |                   |                |                    | 0.000                        |
| Post-secondary level or less                | 78(38.6)       | 75(67.6)          | 3(7.0)         | 0(0)               |                              |
| Undergraduate or higher                     | 118(58.4)      | 32(28.8)          | 40(93.0)       | 46(95.8)           |                              |
| Missing                                     | 6(3.0)         | 4(3.6)            | 0              | 2(4.2)             |                              |
| <b>Position rank</b>                        |                |                   |                |                    | 0.001                        |
| Low                                         | 81(40.1)       | 51(45.9)          | 21(48.8)       | 9(18.8)            |                              |
| Middle                                      | 81(40.1)       | 36(32.4)          | 16(37.2)       | 29(60.4)           |                              |
| High                                        | 18(8.9)        | 4(3.6)            | 6(14.0)        | 8(16.7)            |                              |
| Missing                                     | 22(10.9)       | 20(18.0)          | 0              | 2(4.2)             |                              |
| <b>Work hours/week</b>                      |                |                   |                |                    | 0.000                        |
| < 40                                        | 16(8.2)        | 15(13.5)          | 0              | 1(2.1)             |                              |
| 40 to 50                                    | 60(30.6)       | 42(37.8)          | 13(30.2)       | 5(10.4)            |                              |
| 50 to 60                                    | 48(24.5)       | 27(24.3)          | 10(23.3)       | 11(22.9)           |                              |
| ≥ 60                                        | 72(36.7)       | 23(20.7)          | 20(46.5)       | 29(60.4)           |                              |
| Missing                                     | 6(3.0)         | 4(3.6)            | 0              | 2(4.2)             |                              |
| <b>Outpatient visits per doctor per day</b> |                |                   |                |                    | 0.000                        |
| < 50                                        | 67(33.2)       | 45(40.5)          | 17(39.5)       | 5(10.4)            |                              |
| 50 to 100                                   | 58(28.7)       | 34(30.6)          | 13(30.2)       | 11(22.9)           |                              |
| ≥100                                        | 27(13.4)       | 3(2.7)            | 2(4.7)         | 22(45.8)           |                              |
| Not applicable                              | 40(20.8)       | 24(21.6)          | 9(20.9)        | 7(14.6)            |                              |
| Missing                                     | 10(5.0)        | 5(4.5)            | 2(4.7)         | 3(6.3)             |                              |
| <b>Average visit time/patient (minutes)</b> |                |                   |                |                    | 0.001                        |
| ≤ 4                                         | 32(15.8)       | 8(7.2)            | 6(14.0)        | 18(37.5)           |                              |
| 5-9                                         | 83(41.1)       | 46(41.4)          | 21(48.8)       | 16(33.3)           |                              |
| 10-14                                       | 31(15.3)       | 18(16.2)          | 8(18.6)        | 5(10.4)            |                              |
| 15-20                                       | 10(5.0)        | 7(6.3)            | 1(2.3)         | 2(4.2)             |                              |
| ≥20                                         | 5(2.5)         | 4(3.6)            | 1(2.3)         | 0(0)               |                              |
| Not applicable                              | 33(16.3)       | 24(21.6)          | 4(9.3)         | 5(10.4)            |                              |

|                                    |           |          |          |          |       |
|------------------------------------|-----------|----------|----------|----------|-------|
| Missing                            | 8(4.0)    | 4(3.6)   | 2(4.7)   | 2(4.2)   |       |
| <b>Overtime hours per week</b>     |           |          |          |          | 0.000 |
| < 10                               | 103(51.0) | 69(62.2) | 23(53.5) | 11(22.9) |       |
| 10 to 30                           | 74(36.6)  | 35(31.5) | 15(34.9) | 24(50.0) |       |
| ≥ 30                               | 17(8.4)   | 2(1.8)   | 4(9.3)   | 11(22.9) |       |
| Missing                            | 8(4.0)    | 5(4.5)   | 1(2.3)   | 2(4.2)   |       |
| <b>On-call duties</b>              |           |          |          |          | 0.000 |
| Yes                                | 131(64.9) | 53(47.7) | 35(81.4) | 43(89.6) |       |
| No                                 | 61(30.2)  | 52(46.8) | 7(16.3)  | 2(4.2)   |       |
| Missing                            | 10(5.0)   | 6(5.4)   | 1(2.3)   | 3(6.2)   |       |
| <b>Monthly salary</b>              |           |          |          |          | 0.000 |
| < 1,000 RMB                        | 20(10.2)  | 2(1.8)   | 16(37.2) | 2(4.2)   |       |
| 1,000 – 3,000 RMB                  | 146(74.1) | 84(75.7) | 27(62.8) | 35(72.9) |       |
| 3,000 – 5,000 RMB                  | 29(14.7)  | 21(18.9) | 0        | 8(16.7)  |       |
| ≥ 5,000 RMB                        | 2(1.0)    | 1(0.9)   | 0        | 1(2.1)   |       |
| Missing                            | 5(2.5)    | 3(2.7)   | 0        | 2(4.2)   |       |
| <b>Total bonus last year (RMB)</b> |           |          |          |          | 0.000 |
| < 10,000                           | 34(17.4)  | 27(24.3) | 4(9.3)   | 3(6.2)   |       |
| 10,000 – 30,000                    | 106(54.4) | 57(51.4) | 35(81.4) | 14(29.1) |       |
| 30,000 – 50,000                    | 43(22.1)  | 16(14.4) | 4(9.3)   | 23(47.9) |       |
| 50,000 – 100,000                   | 9(4.6)    | 7(6.3)   | 0        | 2(4.2)   |       |
| 100,000 or higher                  | 3(1.5)    | 0        | 0        | 3(6.3)   |       |
| Missing                            | 7(3.5)    | 4(3.6)   | 0        | 3(6.3)   |       |
| <b>The need to do research</b>     |           |          |          |          | 0.000 |
| Yes                                | 88(44.9)  | 30(27.0) | 18(41.9) | 40(83.3) |       |
| No                                 | 108(55.1) | 77(69.3) | 25(58.2) | 6(6.3)   |       |
| Missing                            | 6(3.0)    | 4(3.6)   | 0        | 2(4.2)   |       |

### Workload and pay (Table 2)

Workload varied considerably with level of hospital. Provincial hospital doctors worked the longest hours, 60% routinely worked more than 60 hours per week with 23% working more than 30 hours per week in overtime (additional work hours and on a “forced voluntary” basis largely due to heavy workload). For county level doctors these figures were 47% and 9%, and primary level doctors reported 21% and 2%. Sixty-nine percent of provincial hospital doctors saw over 50 patients in clinic per day with 46% seeing over 100 patients a day. Thirty-five per cent of doctors at secondary level facilities saw over 50 outpatients per day and 33% at the primary level. Not

1  
2  
3 surprisingly, consultation times were reported to be very short. Nearly 38% of  
4 provincial hospital doctors spent 4 minutes or less on average for each outpatient.  
5  
6 These compared to 14% in county hospitals, and 7% in primary care. Ninety per cent  
7 of doctors at the provincial hospital reported that they did on-call duties (which  
8 usually involved being available on site overnight to deal with referrals and problems),  
9 followed by the county level (81%) and primary level (48%). Eighty-seven percent of  
10 provincial hospital doctors were required to do research in order to be eligible for  
11 promotion. This compared to 42% and 28% in county level and primary care  
12 respectively.  
13  
14  
15  
16  
17  
18  
19  
20  
21  
22  
23

24 Remuneration consists of two parts: a basic salary and a bonus. For most doctors  
25 (74%) their monthly salary was between 1, 000 and 3,000 RMB (1 USD = 6.16 RMB  
26 in 2012), with only 1% paid more than 5,000 RMB per month and 29% paid between  
27 3,000 and 5,000 RMB. Interestingly, 37% of county hospital doctors were paid less  
28 than 1,000 RMB monthly and none of them earned over 3,000 RMB. But 19% and  
29 17% respectively in primary care and tertiary hospitals were paid between 3,000 RMB  
30 and 5,000 RMB. Up to 94% of junior doctors were paid 3,000 RMB or less, compared  
31 to 77% middle ranked doctors and 65% of senior doctors. Annual bonuses, varied  
32 mainly by the level of the hospital, 79% in primary care, 91% in secondary hospitals  
33 and 38% in the tertiary hospital reported 30,000 RMB or less. Half (51%) in the  
34 tertiary hospital received a bonus between 30,000 and 50,000, while only 15% and  
35 9% respectively in primary and secondary hospitals earned this amount. Overall only  
36 12 doctors (6%) reported 50,000 RMB or more; seven of these were primary care  
37 doctors, five tertiary care doctors with none being county hospital doctors. Of those  
38 who did overtime, more than 80% were not paid for it.  
39  
40  
41  
42  
43  
44  
45  
46  
47  
48  
49  
50  
51  
52  
53  
54  
55  
56  
57  
58  
59  
60

## Job satisfaction

Doctors' satisfaction with various aspects of work and conditions is shown in Table 3. Most striking are the differences between primary care practitioners and doctors in higher-level hospitals (county and provincial hospitals). Very low proportions of high-level hospital doctors were satisfied with their working conditions: only 7% at high-level hospitals were satisfied with work hours, compared to 43% in primary care. Percentages for satisfaction with basic salary were 3% and 27% respectively for higher level and primary care. Similar variations in bonuses were reported (6% at higher level versus 20% in primary care). Less than 10% at high levels were satisfied with the amount of paid vacation time (3%), amount of paid sick leave (5%) and opportunities for promotion (9%), with 38%, 41% and 25% respectively in primary care. Interestingly, primary care doctors were most likely to feel they had high social recognition (58%), compared with 29% at the provincial hospital and 23% at the county hospitals. Work relationships showed high levels of satisfaction across all health facilities. Levels of satisfaction with utilization of expertise, opportunity to update expertise and support for training showed only small differences by level.



Table 3 Doctors' job satisfaction by level of hospital (% of completely satisfied or satisfied)

| Items                                            | Satisfied<br>No (%) | 95% CIs of<br>percentages | Satisfied (%)        |                  |                      | p value<br>( $\chi^2$ tests) |
|--------------------------------------------------|---------------------|---------------------------|----------------------|------------------|----------------------|------------------------------|
|                                                  |                     |                           | By level of hospital |                  |                      |                              |
|                                                  |                     |                           | CHCs<br>(N=111)      | County<br>(N=43) | Provincial<br>(N=48) |                              |
| <b>Work schedule and job reward</b>              |                     |                           |                      |                  |                      |                              |
| Hours of work                                    | 52(25.7)            | 20.2 - 32.2               | 46(42.6)             | 2(4.7)           | 4(8.30)              | 0.000                        |
| Flexibility in scheduling                        | 47(23.3)            | 18.0 - 29.6               | 38(35.5)             | 5(11.6)          | 4(8.30)              | 0.000                        |
| Geographical location of work                    | 118(58.4)           | 51.5 - 65.0               | 68(63.0)             | 24(57.1)         | 26(54.2)             | 0.439                        |
| Basic salary                                     | 32(15.8)            | 11.5 - 21.5               | 29(27.4)             | 0(0.0)           | 3(6.3)               | 0.000                        |
| Bonus                                            | 26(12.9)            | 8.9 - 18.2                | 21(20.0)             | 3(7.0)           | 2(4.2)               | 0.000                        |
| Benefits (insurances, travelling etc.)           | 41(20.3)            | 15.3 - 26.4               | 32(30.2)             | 6(14.0)          | 3(6.3)               | 0.000                        |
| Amount of paid vacation time offered             | 43(21.3)            | 16.2 - 27.4               | 40(37.7)             | 1(2.3)           | 2(4.2)               | 0.000                        |
| Amount of paid sick leave offered                | 48(23.8)            | 18.4 - 30.1               | 43(41.0)             | 3(7.0)           | 2(4.2)               | 0.000                        |
| Opportunities for Promotion                      | 34(16.8)            | 12.3 - 22.6               | 26(24.5)             | 4(9.8)           | 4(8.7)               | 0.004                        |
| Job security                                     | 94(46.5)            | 39.8 - 53.4               | 55(50.9)             | 15(36.6)         | 24(51.1)             | 0.536                        |
| Recognition for work by supervisors/senior staff | 113(55.9)           | 49.1 - 62.6               | 65(60.2)             | 22(52.4)         | 26(55.3)             | 0.742                        |
| Recognition in society                           | 87(43.1)            | 36.4 - 50.0               | 63(58.3)             | 10(23.3)         | 14(29.2)             | 0.000                        |
| <b>Work relationships</b>                        |                     |                           |                      |                  |                      |                              |
| Relationships with co workers                    | 168(83.2)           | 77.4 - 87.7               | 96(88.1)             | 37(86.0)         | 35(72.9)             | 0.116                        |
| Relationship(s) with supervisor(s)               | 142(70.3)           | 63.7 - 76.2               | 79(75.2)             | 35(81.4)         | 28(59.6)             | 0.032                        |
| Relationships with subordinates                  | 150(74.3)           | 67.8 - 79.8               | 85(86.7)             | 32(80.0)         | 33(73.3)             | 0.247                        |
| Relationships with nurses                        | 168(83.2)           | 77.4 - 87.7               | 94(86.2)             | 38(88.4)         | 36(75.0)             | 0.271                        |

| <b>Use and update of professional knowledge</b>             |           |             |          |          |          |       |
|-------------------------------------------------------------|-----------|-------------|----------|----------|----------|-------|
| Opportunity to utilize your professional skills and talents | 105(52.0) | 45.1 - 58.8 | 60(56.1) | 21(48.8) | 24(51.1) | 0.938 |
| Opportunity to learn new skills and new knowledge           | 83(41.1)  | 34.5 - 48.0 | 42(38.9) | 16(37.2) | 25(52.1) | 0.573 |
| Support for training and education                          | 87(43.1)  | 36.4 - 50.0 | 49(47.6) | 19(44.2) | 19(39.6) | 0.914 |

**Patients' help seeking behaviours, demands and aggression (Table 4)**

Across all levels of facilities doctors felt patients were becoming more demanding: 84% reported that patients often went to higher level hospitals for simple medical problems which could be solved at primary care facilities, 80% said that patients just want to get drugs or tests rather than medical advice. Across all levels of facilities doctors reported that patients were becoming more aggressive in their demands, with perceptions of high and increasing levels of complaints from patients, who are much more likely to sue than previously, with 87% reporting that there was an increasing trend of violence against doctors. County level doctors consistently reported higher levels for all these items.

Table 4 Patients' help seeking behaviours, demands and aggression by level of hospital (% of strongly agree or agree)

| Items                                                                                                                                            | Agree<br>No (%) | 95% CIs<br>of<br>percentage | Agree(percent)  |                  |                      | p value<br>( $\chi^2$ tests) |
|--------------------------------------------------------------------------------------------------------------------------------------------------|-----------------|-----------------------------|-----------------|------------------|----------------------|------------------------------|
|                                                                                                                                                  |                 |                             | CHCs<br>(N=111) | County<br>(N=43) | Provincial<br>(N=48) |                              |
| Patients often go to higher level hospitals (e.g. tertiary hospitals) with simple complaints which could be dealt with at a lower level hospital | 169(83.7)       | 78.0 - 88.1                 | 95(87.2)        | 35(81.4)         | 39(83.0)             | 0.790                        |
| Sometimes patients just want to get drugs and tests rather than really seeking medical advice from doctors                                       | 162(80.2)       | 74.2 - 85.1                 | 84(79.2)        | 38(88.4)         | 40(85.1)             | 0.631                        |
| Nowadays patients are better informed about their own medical conditions so that sometimes they demand specific treatments from doctors          | 168(83.2)       | 77.4 - 87.7                 | 93(86.9)        | 36(85.7)         | 39(83.0)             | 0.949                        |
| Patients are becoming more aggressive in their demands                                                                                           | 144(71.3)       | 64.7 - 77.1                 | 66(60.6)        | 40(93.0)         | 38(80.9)             | 0.001                        |
| The number of complaints by patients has increased in recent years                                                                               | 153(75.7)       | 69.4 - 81.1                 | 77(72.6)        | 41(95.3)         | 35(72.9)             | 0.006                        |
| Patients are becoming more likely to sue them even when doctors are trying to do their best                                                      | 176(87.1)       | 81.8 - 91.1                 | 93(87.7)        | 43(100.0)        | 40(83.3)             | 0.107                        |
| Violence against doctors by their own patients is increasing                                                                                     | 176(87.1)       | 81.8 - 91.1                 | 92(86.8)        | 43(100.0)        | 41(85.4)             | 0.126                        |

### Influencing factors of job satisfaction

Analysis of Covariance (ANCOVA) comparing job satisfaction scores among sub-groups, adjusted by gender, age and education, are presented in Table 5. Doctors in the provincial hospital appeared to be the most dissatisfied group, and primary care physicians were most satisfied with their work ( $p < 0.001$ ). Those who had worked longer hours ( $p < 0.001$ ), did longer overtime hours ( $p < 0.05$ ), took on-call duties ( $p < 0.01$ ) were more likely to be dissatisfied. Doctors who reported average consultation times of 10-20 minutes per patient and higher monthly salary showed higher satisfaction ( $p < 0.01$ ). Doctors who had more negative perceptions of the doctor-patient relationship (thought patients were more demanding and aggressive) also had lower satisfaction scores.

Table 5 Influencing factors of doctors' job satisfaction controlling for gender, age and education

| Variables                                       | Overall job satisfaction |      |          |
|-------------------------------------------------|--------------------------|------|----------|
|                                                 | Mean                     | SD   | p value* |
| <b>Level of hospital</b>                        |                          |      | 0.000    |
| Primary (CHCs and THCs)                         | 3.23                     | 0.06 |          |
| Secondary (county hospitals)                    | 2.83                     | 0.08 |          |
| Tertiary (provincial hospital)                  | 2.82                     | 0.09 |          |
| <b>Position rank</b>                            |                          |      | 0.064    |
| Low                                             | 3.12                     | 0.06 |          |
| Middle                                          | 2.91                     | 0.06 |          |
| High                                            | 2.97                     | 0.15 |          |
| <b>Work hours per week</b>                      |                          |      | 0.000    |
| <50                                             | 3.23                     | 0.06 |          |
| 50 or more                                      | 2.92                     | 0.05 |          |
| <b>Outpatient visits per doctor per day</b>     |                          |      | 0.102    |
| <50                                             | 3.14                     | 0.07 |          |
| 50to 100                                        | 2.99                     | 0.07 |          |
| ≥100                                            | 2.85                     | 0.11 |          |
| Not applicable                                  | 3.12                     | 0.08 |          |
| <b>Average visit time per patient (minutes)</b> |                          |      | 0.004    |

|                                                                                                                                                  |      |      |       |
|--------------------------------------------------------------------------------------------------------------------------------------------------|------|------|-------|
| <10                                                                                                                                              | 2.92 | 0.05 |       |
| 10-20                                                                                                                                            | 3.23 | 0.08 |       |
| ≥20                                                                                                                                              | 2.97 | 0.25 |       |
| Not applicable                                                                                                                                   | 3.22 | 0.09 |       |
| <b>Overtime hours per week</b>                                                                                                                   |      |      | 0.020 |
| <10                                                                                                                                              | 3.15 | 0.05 |       |
| 10 to 30                                                                                                                                         | 2.95 | 0.06 |       |
| ≥ 30                                                                                                                                             | 2.83 | 0.13 |       |
| <b>On-call duties</b>                                                                                                                            |      |      | 0.001 |
| Yes                                                                                                                                              | 2.94 | 0.05 |       |
| No                                                                                                                                               | 3.26 | 0.08 |       |
| <b>Monthly salary</b>                                                                                                                            |      |      | 0.004 |
| <1,000 RMB                                                                                                                                       | 2.72 | 0.12 |       |
| 1,000-3,000 RMB                                                                                                                                  | 3.05 | 0.04 |       |
| ≥ 3,000 RMB                                                                                                                                      | 3.24 | 0.10 |       |
| <b>Patients' help seeking behaviours and aggression</b>                                                                                          |      |      |       |
| Patients often go to higher level hospitals (e.g. tertiary hospitals) with simple complaints which could be dealt with at a lower level hospital |      |      | 0.718 |
| Disagree                                                                                                                                         | 3.07 | 0.10 |       |
| Agree                                                                                                                                            | 3.04 | 0.04 |       |
| Sometimes patients just want to get drugs and tests rather than really seeking medical advice from doctors                                       |      |      | 0.040 |
| Disagree                                                                                                                                         | 3.22 | 0.09 |       |
| Agree                                                                                                                                            | 3.01 | 0.04 |       |
| Nowadays patients are better informed about their own medical conditions so that sometimes they demand specific treatments from doctors          |      |      | 0.586 |
| Disagree                                                                                                                                         | 2.99 | 0.11 |       |
| Agree                                                                                                                                            | 3.05 | 0.04 |       |
| Patients are becoming more aggressive in their demands                                                                                           |      |      | 0.008 |
| Disagree                                                                                                                                         | 3.22 | 0.08 |       |
| Agree                                                                                                                                            | 2.98 | 0.04 |       |
| Patients are becoming more likely to sue them even when doctors are trying to do their best                                                      |      |      | 0.532 |
| Disagree                                                                                                                                         | 3.12 | 0.13 |       |
| Agree                                                                                                                                            | 3.04 | 0.04 |       |
| The number of complaints by patients has increased in recent years                                                                               |      |      | 0.052 |
| Disagree                                                                                                                                         | 3.19 | 0.09 |       |
| Agree                                                                                                                                            | 3.00 | 0.04 |       |
| Violence against doctors by their own patients is increasing                                                                                     |      |      | 0.063 |
| Disagree                                                                                                                                         | 3.27 | 0.13 |       |
| Agree                                                                                                                                            | 3.02 | 0.04 |       |

\*p values for Analysis of Covariance (ANCOVA) controlling gender, age and education

1  
2  
3  
4  
5  
6 Finally, 88% (177) of the doctors said they would not want their children to be  
7 doctors. Of those 125 who provided a reason, 42 (34%) said poor pay, 22 (18%) said  
8 high pressure from work, and 21 (17%) said it was a high-risk profession. Eleven (9%)  
9 expressed concerns about personal insecurity or patient violence and conflicts, 11 (9%)  
10 cited the poor doctor patient relationship, and 17 (14%) stated low status and social  
11 recognition.  
12  
13  
14  
15  
16  
17  
18  
19

## 20 **DISCUSSION**

21  
22 This study provides some insights into the reasons for the low morale in the medical  
23 profession in China. Given perceived low status, high perceived risk of violence and  
24 increasing litigation, it is perhaps not surprising that job satisfaction is low and that  
25 the overwhelming majority of our sample (88%) do not want their children to be  
26 doctors. Concerns for the future of the medical profession, and threats to the health  
27 system are being voiced quite openly even by senior Chinese authorities.<sup>31</sup>  
28  
29  
30  
31  
32  
33  
34  
35  
36  
37

38 Our findings highlight the causes of low job satisfaction among doctors. They also  
39 show that despite being the best qualified, and having the highest status and the  
40 highest income, doctors at the provincial hospital were the most dissatisfied group,  
41 followed by county hospital doctors with primary care doctors the most satisfied. The  
42 causes of dissatisfaction fall into three main areas: low income, heavy workload and  
43 patient aggression. We will discuss these three factors together with the policy  
44 implications.  
45  
46  
47  
48  
49  
50  
51  
52  
53

### 54 **Income**

1  
2  
3 Low income is a major grievance, mirroring findings in previous studies.<sup>28 32</sup> Even at  
4  
5 provincial level, 80% earned an annual salary of 36,000 RMB or less. Among senior  
6  
7 doctors 35% earned more than this. This compared to the average annual income of  
8  
9 34,550 RMB in urban Zhejiang in 2012.<sup>33</sup> While bonuses increase this considerably  
10  
11 for some doctors, the overall income is still not regarded by most as sufficient  
12  
13 compensation for the long hours, and the risks incurred.  
14  
15

16  
17 To better remunerate doctors of course demands more resources, but government  
18  
19 investment in health remains insufficient. Total health expenditure remained under  
20  
21 5% of GDP before the health reforms in 2009 and saw a slight increase to 5.36% in  
22  
23 2012, compared to a GDP growth of 9.3% in 2011 and 7.8% in 2012.<sup>34 35</sup> This  
24  
25 compares with total health spending of around 10% of GDP in UK, Germany, France,  
26  
27 Norway, Canada, and Japan.<sup>36</sup> Government subsidy into these so-called public health  
28  
29 facilities, accounts for less than 10% of higher-level hospital revenue and 40% of  
30  
31 community health centre revenue.<sup>37 38</sup>  
32  
33  
34  
35

36 Fees for basic medical services, including doctors' consultation, nursing services and  
37  
38 surgical procedures, have been kept low ostensibly in order to ensure access to basic  
39  
40 care for all.<sup>39</sup> For example in Beijing<sup>40</sup>, a doctor consultation fee in an outpatient  
41  
42 department is 2.5 RMB at a community health centre and 4 RMB at a tertiary hospital.  
43  
44 The staff costs (surgeons, nurses, anaesthetists) for an appendectomy are 150 RMB.  
45  
46 These low costs are blamed in medical circles for the undervaluing medical  
47  
48 expertise.<sup>41</sup> Because these charges are kept low, facilities operate a market system,  
49  
50 making profits from prescribing drugs and tests. The health reforms were meant to  
51  
52 address the problem of perverse incentives, partly through the introduction of the zero  
53  
54 mark-up essential drug policy in 2009. The government started the policy in primary  
55  
56  
57  
58  
59  
60



1  
2  
3 care level and it is now being rolled-out in higher-level hospitals. With no mark-up  
4 from drugs now possible, the basic salary for the majority of doctors remains low.<sup>10</sup> A  
5 series of experimental initiatives aiming to augment doctors' income are being  
6 launched, such as pay-for-performance and raising prices of services, including  
7 consultation fees and procedures. But this may not fill the gap and doctors' income  
8 remains low. Some doctors are finding other ways to complement income. For  
9 example a shift is being seen towards prescribing more Traditional Chinese Medicine.

10  
11  
12  
13  
14  
15  
16  
17  
18  
19  
20  
21  
22  
23  
24  
25  
26  
27  
28  
29  
30  
31  
32  
33  
34  
35  
36  
37  
38  
39  
40  
41  
42  
43  
44  
45  
46  
47  
48  
49  
50  
51  
52  
53  
54  
55  
56  
57  
58  
59  
60

Appropriate measures to address effort-reward imbalance must be taken. First, increasing government funding to increase doctors' salary can help to attract and retain good doctors. Second, increasing charges for healthcare may be useful to increase hospital revenue, to reflect the value of doctors' expertise and to improve their self-value and morale. This increase should be covered by governmental insurance schemes. Third, involving doctors in proper evaluation and modifications of essential drug list policy is necessary, especially in deciding which drugs are on the list. There are known to be grievances about the content of the list and doctors want more autonomy in this regard.<sup>9</sup> Also, it is important to note the socioeconomic disparities across China. It is extremely difficult to prescribe a national strategy, and exploration of local policies tailored to local social-economic conditions is warranted.

### **Workload**

Long working hours appear to be a major contributor to dissatisfaction, especially at provincial and county hospitals. Here the huge volume of outpatients makes it difficult to spend sufficient time with patients, affecting quality of care and the doctor-patient relationship. With no gatekeeping systems in primary care, many

1  
2  
3 patients bypass lower levels to go to where they think they will get the best care, that  
4 is, provincial level hospitals. Inappropriate use of higher level care was commented  
5 on by 84% of our respondents. The health reform measures taken to strengthen  
6 primary care aimed partly to address this problem of massive overutilization of  
7 secondary and tertiary facilities for mostly minor conditions. But the reforms have  
8 probably made no difference.<sup>9</sup> This is because improvements in health insurance  
9 re-imburement have improved access, especially to higher-level facilities. Around  
10 96% of the population now have health insurance.<sup>42</sup> The outpatient throughput from  
11 2009 to 2012 increased by 50% from 303 million to 455 million.<sup>43</sup>

22  
23  
24 With 46% of all out-patient consultations occurring at county level and above in  
25 2012<sup>44</sup>, the sheer volume of out-patient visits necessitates a very short consultation,  
26 inevitably jeopardising the quality of care. The health reforms have failed to  
27 discourage patients from inappropriately using higher-level care for minor conditions  
28 and this was a major goal of the reforms.

29  
30  
31 The discrepancy in workload and pressure between primary and higher level care  
32 partly explains the differences in job satisfaction. In primary care doctors are not  
33 subject to the same pressures of long working hours, short and rushed consultations,  
34 and often unpaid overtime. In addition, primary care doctors mainly manage patients  
35 who are not seriously ill, and hence are less likely to be the target of patient  
36 complaints or aggression. To tackle the underlying problem of inappropriate use of  
37 higher level facilities, the primary care system needs to be further strengthened with  
38 the addition of a gate-keeping role. As we found in our study, primary care doctors  
39 have much lower educational attainment, and this may contribute to the long standing  
40 mistrust among the public. It has been 15 years since the introduction of community  
41  
42  
43  
44  
45  
46  
47  
48  
49  
50  
51  
52  
53  
54  
55  
56  
57  
58  
59  
60

1  
2  
3 health services as a new primary health care model in urban areas. Despite the  
4  
5 increasing government support, the general public still lack trust in these urban  
6  
7 primary care physicians.<sup>45</sup> The medical education curriculum needs to include more  
8  
9 primary care and thus attract more well-qualified doctors into primary care. This  
10  
11 would help to reduce patient flow to high level hospitals, and be far more  
12  
13 cost-effective. However, the potential impact of a gate-keeping policy on primary care  
14  
15 is not clear. Although it would make financial sense, a shift in workload to primary  
16  
17 care may reduce job satisfaction for doctors at this level, creating new problems. A  
18  
19 number of ongoing pilots in limited forms of gate-keeping<sup>46</sup>, may provide some  
20  
21 insights into the effects on job satisfaction across the three levels.  
22  
23  
24  
25

### 26 **Patient aggression**

27  
28  
29 Patients' aggressive demands and violence are having a serious impact on doctors' job  
30  
31 satisfaction.<sup>11 47</sup> The situation is compounded by the fact that many of these violent  
32  
33 events take place not only with impunity of the legal authorities, but also with the  
34  
35 tolerance of the general public. In addition, while many receive scant media publicity,  
36  
37 the internet spreads news of these events rapidly and widely. This has bred fears and  
38  
39 insecurity, contributing to low morale in the profession.<sup>12</sup>  
40  
41  
42  
43

44  
45 The causes of this patient aggression are complex. First, perverse incentives and  
46  
47 doctors' profit seeking behaviours have compromised quality of care, and led to  
48  
49 erosion of professional ethics and higher medical costs.<sup>48</sup> Certain areas of the media  
50  
51 have taken to criticising doctors for their "irresponsible and wrong" advice, and  
52  
53 occasional cases of extremely high medical expenses, which make patients feel  
54  
55  
56  
57  
58  
59  
60

1  
2  
3 exploited.<sup>49</sup> In addition, patients are better informed about medical problems due to  
4  
5 increasingly accessible health information, leading them to be more demanding.  
6  
7

8  
9 Second, in a commoditized health care system, despite high coverage of medical  
10  
11 insurance, patients are still paying a large portion of their medical expenses  
12  
13 out-of-pocket.<sup>37</sup> Together with long waiting times and short consultation times, poor  
14  
15 communication between doctors and patients can easily trigger tension between the  
16  
17 two parties when doctors fail to meet patients' high expectations. Third, as doctors are  
18  
19 the ones who dictate patient care, they are an easy target for patients' complaints and  
20  
21 frustration.  
22  
23

24  
25 Measures to prevent patient aggression against doctors are necessary. National  
26  
27 measures to strengthen hospital security and criminalize any acts causing hospital  
28  
29 disturbance were taken<sup>50</sup> soon after a doctor was killed by a 17 year-old patient in  
30  
31 2012. But these have been poorly enforced and critics argue that this does not solve  
32  
33 the underlying systemic issues. More radical solutions are needed to prevent violence  
34  
35 in health facilities. Policies of 'zero tolerance' towards violence in healthcare sectors  
36  
37 are recommended by the most influential medical associations in China.<sup>51</sup> But the  
38  
39 medical associations have no enforcement powers and are very rarely actually  
40  
41 involved in medical disputes. Education programs assisting doctors to prevent and  
42  
43 manage patient violence may also be beneficial.<sup>52</sup> An emphasis on doctor-patient  
44  
45 communication skills in the medical school syllabus may help improve the  
46  
47 doctor-patient relationship, and reduce patient aggression.<sup>53</sup>  
48  
49  
50  
51

## 52 53 **Limitations**

54  
55  
56  
57  
58  
59  
60

1  
2  
3 The study has some limitations. First, we sampled only four cities and counties in the  
4 province and only one provincial hospital. So the results have limited generalisability.  
5  
6 The sample size was relatively small and doctors' participation was voluntary, leading  
7 to potential bias. However, we did sample across three levels of health institutions in  
8 four places, with different economic levels. Second, as there are almost no studies on  
9 this topic, comparisons could not be made. Thirdly, the job satisfaction score was  
10 developed for the paper and has not been formally validated. Nevertheless, it enabled  
11 us to compare the job satisfaction of doctors across different levels of hospital. But as  
12 a first study comparing job satisfaction at three levels of facility and exploring  
13 associated systemic factors, we have provided a starting point for further research into  
14 exploring related issues in China.  
15  
16  
17  
18  
19  
20  
21  
22  
23  
24  
25  
26  
27

## 28 CONCLUSION

29  
30  
31 Doctors in Zhejiang province, China, have low job satisfaction overall. Measures  
32 must be taken to address this in order to address future problems of recruitment and  
33 retention of doctors. These measures must **first** include reduction of doctors' workload,  
34 especially at provincial hospitals partly [through incentivisation of appropriate](#)  
35 [utilisation of primary care, and](#), increase in doctors' salary, and more punitive  
36 measures against individuals who commit violent acts against doctors. [More research](#)  
37 [is needed to explore in depth the underlying causes of job satisfaction and discontent](#)  
38 [in Chinese doctors. There may be lessons from other countries and systems, where job](#)  
39 [satisfaction among doctors is generally high.](#)<sup>54 55</sup>  
40  
41  
42  
43  
44  
45  
46  
47  
48  
49  
50  
51  
52

## 53 Acknowledgements

1  
2  
3 The authors gratefully acknowledge Professor Yu Hai and Professor Du Ya Ping, Yu  
4 Di Di from School of Medicine, Zhejiang University, Mao Li Nan from Health  
5 Bureau of Zhejiang province, Zhou Peng Cheng from Xiangya Hospital Central South  
6 University for their help during questionnaire development and data collection, and  
7 Professor Lam Tai Pong from the University of Hong Kong for his kind support  
8 during manuscript preparation.  
9  
10  
11  
12  
13  
14

### 15 16 17 **Authors' contributions**

18  
19  
20 TH and DW designed the study and the questionnaire. DW carried out the survey.  
21  
22 KFL and YW performed the statistical analysis. DW, TH and YW interpreted the  
23 analysis. DW and TH drafted the manuscript. All authors read and approved the final  
24 manuscript.  
25  
26  
27  
28  
29

### 30 31 **Funding**

32  
33  
34 This research received no specific grant from any funding agency in the public,  
35 commercial or not-for-profit sectors  
36  
37  
38

### 39 40 **Competing interests**

41  
42  
43 The authors declare that they have no competing interests.  
44  
45

### 46 47 **Ethical approvals**

48  
49  
50 The study is a student research project that has received ethical approval from the  
51 UCL Research Ethics Committee.  
52  
53  
54

### 55 56 **Data sharing statement**

No additional data are available.

## REFERENCES

1. Li D, Yin W, Zhang X, et al. Investigation on turnover intention of medical staff in public hospitals and research of early-warning system's construction. *Chinese Journal of Hospital Administration* 2010;**26**(03):218-21.
2. National Health and Family Planning Commission PRC. *Research on relationship between Yi and Huan in China, 2008*: Center for Health Statistics and Information 2008:P106.
3. Wang ZG. *Worrying conditions of doctors' practising environment: 78% of the doctors do not want their children to be doctors 2013*. [http://news.china.com.cn/2013-10/27/content\\_30414901.htm](http://news.china.com.cn/2013-10/27/content_30414901.htm) (accessed 3 Mar 2014).
4. Shanghai Jiao Tong University. *Announcement of results of changing majors for students admitted in 2013*. <http://www.jwc.sjtu.edu.cn/web/sjtu/198015-1980000004584.htm> (accessed 27 May 2014).
5. Flaherty JH, Liu ML, Ding L, et al. China: the aging giant. *J Am Geriatr Soc* 2007;**55**(8):1295-300.
6. CDC US. *U.S. CDC IN CHINA: 2010-2011 Annual Report Healthy People in a Health China*, 2013.
7. Song K, Scott A, Sivey P, et al. Improving Chinese primary care providers' recruitment and retention: a discrete choice experiment. *Health Policy Plan* 2013.
8. China Daily. *WeChat poll revealed "90% of participants do not want children to be doctors: high pressure and intense doctor-patient conflicts are main reasons"*. [http://www.chinadaily.com.cn/micro-reading/dzh/2014-04-23/content\\_11627822.html](http://www.chinadaily.com.cn/micro-reading/dzh/2014-04-23/content_11627822.html) (accessed 23 May 2014).
9. Zhou XD, Li L, Hesketh T. Health system reform in rural China: Voices of healthworkers and service-users. *Soc Sci Med* 2014;**117**:134-41.
10. Guan XD, Liang HG, Xue YJ, et al. An analysis of China's national essential medicines policy. *J Public Health Policy* 2011;**32**(3):305-19.

- 1  
2  
3 11. Zhang X, Sleeboom-Faulkner M. Tensions between medical professionals and  
4 patients in mainland China. *Camb Q Healthc Ethics* 2011;**20**(3):458.  
5  
6  
7 12. Hesketh T, Wu D, Mao LN, et al. Violence against doctors in China. *Br Med J*  
8 2012;**345**.  
9  
10  
11 13. Wang ZG. *Yi Nao incidents increased by 7000 over last five years: illegal gangs*  
12 *made huge profits* 2012.  
13 [http://www.china.com.cn/news/2012-05/03/content\\_25287333\\_2.htm](http://www.china.com.cn/news/2012-05/03/content_25287333_2.htm) (accessed 23 Jul  
14 2014).  
15  
16  
17 14. Xiong C. *Medical malpractice and medical disputes*. Chinese Hospital  
18 Association Guide 2006.  
19  
20  
21 15. Wu SY, Zhu W, Li HY, et al. Workplace violence and influencing factors among  
22 medical professionals in China. *Am J Ind Med* 2012;**55**(11):1000-08.  
23  
24  
25 16. Ding Xiang Yuan. *Chinese Hospital Association: violence against doctors gets*  
26 *worse*. <http://vote.dxy.cn/report/dxy/id/57914> (accessed 28 Feb 2014).  
27  
28  
29 17. BMA. *Violence at work: the experience of UK doctors*: Health Policy and  
30 Economic Research Unit, British Medical Association, 2003.  
31  
32  
33 18. Algwaiz WM, Alghanim SA. Violence exposure among health care professionals  
34 in Saudi public hospitals. A preliminary investigation. *Saudi Med J* 2012;**33**(1):76-82.  
35  
36  
37 19. Behnam M, Tillotson RD, Davis SM, et al. Violence in the emergency department:  
38 a national survey of emergency medicine residents and attending physicians. *J Emerg*  
39 *Med* 2011;**40**(5):565-79.  
40  
41  
42 20. Forrest LE, Herath PM, McRae IS, et al. A national survey of general  
43 practitioners' experiences of patient-initiated aggression in Australia. *Med J Aus*  
44 2011;**194**(11):605-08.  
45  
46  
47 21. Joa TS, Morken T. Violence towards personnel in out-of-hours primary care: a  
48 cross-sectional study. *Scand J Prim Health Care* 2012;**30**(1):55-60.  
49  
50  
51 22. Kowalenko T, Walters BL, Khare RK, et al. Workplace violence: a survey of  
52 emergency physicians in the state of Michigan. *Ann Emerg Med* 2005;**46**(2):142-47.  
53  
54  
55  
56  
57  
58  
59  
60



- 1  
2  
3 23. Magnavita N, Heponiemi T. Violence towards health care workers in a Public  
4 Health Care Facility in Italy: a repeated cross-sectional study. *BMC Health Serv Res*  
5 2012;**12**(1):108.  
6  
7  
8 24. Mirza NM, Amjad AI, Bhatti ABH, et al. Violence and abuse faced by junior  
9 physicians in the emergency department from patients and their caretakers: a  
10 nationwide study from Pakistan. *J Emerg Med* 2012;**42**(6):727-33.  
11  
12  
13 25. Saeki K, Okamoto N, Tomioka K, et al. Work-related aggression and violence  
14 committed by patients and its psychological influence on doctors. *J Occup Health*  
15 2011;**53**(5):356-64.  
16  
17  
18 26. Sibbald B, Bojke C, Gravelle H. National survey of job satisfaction and retirement  
19 intentions among general practitioners in England. *Br Med J* 2003;**326**(7379):22.  
20  
21  
22  
23 27. Liu JA, Wang Q, Lu ZX. Job satisfaction and its modeling among township health  
24 center employees: a quantitative study in poor rural China. *BMC Health Serv Res*  
25 2010;**10**(1):115.  
26  
27  
28 28. Shi L, Song K, Rane S, et al. Factors associated with job satisfaction by Chinese  
29 primary care providers. *Prim Health Care Res Dev* 2014;**15**(01):46-57.  
30  
31  
32 29. Thakur M. Job satisfaction in banking: A study of private and public sector banks.  
33 *The IUP Journal of Bank Management* 2007;**6**(4):60-68.  
34  
35  
36 30. Buciuuniene I, Blazeviciene A, Bliudziute E. Health care reform and job  
37 satisfaction of primary health care physicians in Lithuania. *BMC Fam Pract*  
38 2005;**6**(1):10.  
39  
40  
41 31. Ren Min Wang PRC. *Liao Xin Bo: Improve doctors' dignity.*  
42 <http://www.people.com.cn/n/2014/0213/c347759-24348138.html> (accessed 23 May  
43 2014).  
44  
45  
46 32. Lim M-K, Yang H, Zhang T, et al. China's evolving health care market: how  
47 doctors feel and what they think. *Health Policy* 2004;**69**(3):329-37.  
48  
49  
50  
51 33. Zhejiang Provincial Bureau of Statistics. *Statistical report on national economy*  
52 *and social development in Zhejiang Province, 2012.*  
53 [http://tjj.zj.gov.cn/tjgb/gmjshfzgb/201302/t20130208\\_122162.html](http://tjj.zj.gov.cn/tjgb/gmjshfzgb/201302/t20130208_122162.html) (accessed 21 Feb  
54 2014).  
55  
56  
57  
58  
59  
60

- 1  
2  
3 34. The World Bank. *World Development Indicators: GDP growth (annual %)*.  
4 <http://data.worldbank.org/indicator/NY.GDP.MKTP.KD.ZG> (accessed 7 Apr 2014).  
5  
6  
7 35. National Health and Family Planning Commission PRC. *Health statistics in China,*  
8 *2012*.  
9 [http://www.moh.gov.cn/zwgkzt/ptjty/201206/55044/files/3ca7756121334b7a870a25a](http://www.moh.gov.cn/zwgkzt/ptjty/201206/55044/files/3ca7756121334b7a870a25ac79988f23.pdf)  
10 [c79988f23.pdf](http://www.moh.gov.cn/zwgkzt/ptjty/201206/55044/files/3ca7756121334b7a870a25ac79988f23.pdf) (accessed 7 Apr 2014).  
11  
12  
13 36. The World Bank. *Health expenditure, total (% of GDP) 2012*.  
14 <http://data.worldbank.org/indicator/SH.XPD.TOTL.ZS> (accessed 24 May 2014).  
15  
16  
17 37. National Health and Family Planning Commission PRC. *China Health Statistics*  
18 *Yearbook* 2013.  
19 <http://www.nhfpc.gov.cn/htmlfiles/zwgkzt/ptjnj/year2013/index2013.html> (accessed  
20 23 May 2014).  
21  
22  
23  
24 38. Ren YJ, Ji QY. Analysis of salary distribution system in public hospitals. *Journal*  
25 *of Shanghai Jiaotong University (Medical Science)* 2013;**33**(6).  
26  
27  
28 39. Yip W, Hsiao WC. The Chinese health system at a crossroads. *Health Aff*  
29 2008;**27**(2):460-68.  
30  
31  
32 40. Beijing Municipal Commission of Development and Reform. *Prices of medical*  
33 *services in Beijing*. <http://service2.bjpc.gov.cn/bjpc/mediprice/MedicalService1.jsp>  
34 (accessed 28 Apr 2014).  
35  
36  
37 41. Wang XH. *Zhong Nan Shan: Chinese doctors survive by selling drugs and the*  
38 *value of their expertise is not being reflected*.  
39 [http://news.xinhuanet.com/health/2014-03/06/c\\_126226620.htm](http://news.xinhuanet.com/health/2014-03/06/c_126226620.htm) (accessed 24 May  
40 2014).  
41  
42  
43 42. Meng Q, Xu L, Zhang Y, et al. Trends in access to health services and financial  
44 protection in China between 2003 and 2011: a cross-sectional study. *Lancet*  
45 2012;**379**(9818):805-14.  
46  
47  
48  
49 43. Health Bureau of Zhejiang Province. *Health statistics in Zhejiang Province*.  
50 <http://www.zjwst.gov.cn/col/col320/index.html###> (accessed 31 Mar 2014 ).  
51  
52  
53 44. Health Bureau of Zhejiang Province. *Outpatient services in health facilities in*  
54 *Zhejiang Province,* 2012.  
55  
56  
57  
58  
59  
60

1  
2  
3 [http://www.zjwst.gov.cn/art/2013/4/15/art\\_320\\_227356.html](http://www.zjwst.gov.cn/art/2013/4/15/art_320_227356.html) (accessed 31 Mar  
4 2014 ).

5  
6  
7 45. Du J, Lu X, Wang Y, et al. Mutual referral: a survey of GPs in Beijing. *Fam Pract*  
8 2012;**29**(4):441-7.

9  
10  
11 46. Jia L, Ze Yong F. Dilemma of Community First Contact Care. *Chinese General*  
12 *Practice* 2012;**15**(3A):720-22.

13  
14  
15 47. Yao Y, Wang W, Wang F, et al. General self-efficacy and the effect of hospital  
16 workplace violence on doctors' stress and job satisfaction in China. *Int J Occup Med*  
17 *Environ Health* 2014;**27**(3):1-11.

18  
19  
20 48. Yip WC-M, Hsiao W, Meng Q, et al. Realignment of incentives for health-care  
21 providers in China. *Lancet* 2010;**375**(9720):1120-30.

22  
23  
24 49. Jie YX. *10 doctors calls for apologies from mass media about falsified reports*  
25 *2014*.  
26 <http://www.yxj.org.cn/news/yijieyaowen/shehuijiaodian/2014052109582936651.htm>  
27 (accessed 23 May 2014 ).

28  
29  
30 50. National Health and Family Planning Commission PRC. *The directive of*  
31 *maintaining order at medical institutions by Police Department, Ministry of Health*.  
32 <http://wsb.moh.gov.cn/zwgkzt/ptg/201204/54578.shtml> (accessed 11 Feb 2014).

33  
34  
35 51. CMA. *United call for "Zero tolerance to medical violence" by Chinese Medical*  
36 *Association, Chinese Medical Doctor Association, Chinese Hospital Association and*  
37 *Chinese Health Law Society*.  
38 [http://www.cma.org.cn/index/xhdt/20131029/1383026180011\\_1.html](http://www.cma.org.cn/index/xhdt/20131029/1383026180011_1.html) (accessed 11  
39 Feb 2014).

40  
41  
42 52. Zernike W, Sharpe P. Patient aggression in a general hospital setting: do nurses  
43 perceive it to be a problem? *Int J Nurs Pract* 1998;**4**(2):126-33.

44  
45  
46 53. Ong LM, De Haes JC, Hoos AM, et al. Doctor-patient communication: a review  
47 of the literature. *Soc Sci Med* 1995;**40**(7):903-18.

48  
49  
50 54. Aasland OG, Rosta J, Nylenna M. Health care reforms and job satisfaction among  
51 doctors in Norway. *Scand J Public Health* 2010.

1  
2  
3 55. Voltmer E, Rosta J, Siegrist J, et al. Job stress and job satisfaction of physicians in  
4 private practice: comparison of German and Norwegian physicians. *Int Arch Occup*  
5 *Environ Health* 2012;**85**(7):819-28.  
6  
7  
8  
9  
10  
11  
12  
13  
14  
15  
16  
17  
18  
19  
20  
21  
22  
23  
24  
25  
26  
27  
28  
29  
30  
31  
32  
33  
34  
35  
36  
37  
38  
39  
40  
41  
42  
43  
44  
45  
46  
47  
48  
49  
50  
51  
52  
53  
54  
55  
56  
57  
58  
59  
60

For peer review only

**STROBE 2007 (v4) checklist of items to be included in reports of observational studies in epidemiology\***  
**Checklist for cohort, case-control, and cross-sectional studies (combined)**

| Section/Topic             | Item # | Recommendation                                                                                                                                                                                                                                                                                                                                                                                                                                                         | Reported on page # |
|---------------------------|--------|------------------------------------------------------------------------------------------------------------------------------------------------------------------------------------------------------------------------------------------------------------------------------------------------------------------------------------------------------------------------------------------------------------------------------------------------------------------------|--------------------|
| Title and abstract        | 1      | (a) Indicate the study's design with a commonly used term in the title or the abstract                                                                                                                                                                                                                                                                                                                                                                                 | 1–2                |
|                           |        | (b) Provide in the abstract an informative and balanced summary of what was done and what was found                                                                                                                                                                                                                                                                                                                                                                    | 2                  |
| <b>Introduction</b>       |        |                                                                                                                                                                                                                                                                                                                                                                                                                                                                        |                    |
| Background/rationale      | 2      | Explain the scientific background and rationale for the investigation being reported                                                                                                                                                                                                                                                                                                                                                                                   | 4–6                |
| Objectives                | 3      | State specific objectives, including any pre-specified hypotheses                                                                                                                                                                                                                                                                                                                                                                                                      | 6                  |
| <b>Methods</b>            |        |                                                                                                                                                                                                                                                                                                                                                                                                                                                                        |                    |
| Study design              | 4      | Present key elements of study design early in the paper                                                                                                                                                                                                                                                                                                                                                                                                                | 6                  |
| Setting                   | 5      | Describe the setting, locations, and relevant dates, including periods of recruitment, exposure, follow-up, and data collection                                                                                                                                                                                                                                                                                                                                        | 6–7                |
| Participants              | 6      | (a) <i>Cohort study</i> —Give the eligibility criteria, and the sources and methods of selection of participants. Describe methods of follow-up<br><i>Case-control study</i> —Give the eligibility criteria, and the sources and methods of case ascertainment and control selection. Give the rationale for the choice of cases and controls<br><i>Cross-sectional study</i> —Give the eligibility criteria, and the sources and methods of selection of participants | 6–7                |
|                           |        | (b) <i>Cohort study</i> —For matched studies, give matching criteria and number of exposed and unexposed<br><i>Case-control study</i> —For matched studies, give matching criteria and the number of controls per case                                                                                                                                                                                                                                                 | N/A                |
| Variables                 | 7      | Clearly define all outcomes, exposures, predictors, potential confounders, and effect modifiers. Give diagnostic criteria, if applicable                                                                                                                                                                                                                                                                                                                               | 7–8                |
| Data sources/ measurement | 8*     | For each variable of interest, give sources of data and details of methods of assessment (measurement). Describe comparability of assessment methods if there is more than one group                                                                                                                                                                                                                                                                                   | 8                  |
| Bias                      | 9      | Describe any efforts to address potential sources of bias                                                                                                                                                                                                                                                                                                                                                                                                              | N/A                |
| Study size                | 10     | Explain how the study size was arrived at                                                                                                                                                                                                                                                                                                                                                                                                                              | 6–7                |
| Quantitative variables    | 11     | Explain how quantitative variables were handled in the analyses. If applicable, describe which groupings were chosen and why                                                                                                                                                                                                                                                                                                                                           | 8                  |
| Statistical methods       | 12     | (a) Describe all statistical methods, including those used to control for confounding                                                                                                                                                                                                                                                                                                                                                                                  | 8                  |
|                           |        | (b) Describe any methods used to examine subgroups and interactions                                                                                                                                                                                                                                                                                                                                                                                                    | 8                  |
|                           |        | (c) Explain how missing data were addressed                                                                                                                                                                                                                                                                                                                                                                                                                            | N/A                |
|                           |        | (d) <i>Cohort study</i> —If applicable, explain how loss to follow-up was addressed<br><i>Case-control study</i> —If applicable, explain how matching of cases and controls was addressed                                                                                                                                                                                                                                                                              | N/A                |

|                          |     |                                                                                                                                                                                                              |       |
|--------------------------|-----|--------------------------------------------------------------------------------------------------------------------------------------------------------------------------------------------------------------|-------|
|                          |     | <i>Cross-sectional study</i> —If applicable, describe analytical methods taking account of sampling strategy                                                                                                 |       |
|                          |     | (e) Describe any sensitivity analyses                                                                                                                                                                        | N/A   |
| <b>Results</b>           |     |                                                                                                                                                                                                              |       |
| Participants             | 13* | (a) Report numbers of individuals at each stage of study—eg numbers potentially eligible, examined for eligibility, confirmed eligible, included in the study, completing follow-up, and analysed            | 8     |
|                          |     | (b) Give reasons for non-participation at each stage                                                                                                                                                         | N/A   |
|                          |     | (c) Consider use of a flow diagram                                                                                                                                                                           | N/A   |
| Descriptive data         | 14* | (a) Give characteristics of study participants (eg demographic, clinical, social) and information on exposures and potential confounders                                                                     | 8-11  |
|                          |     | (b) Indicate number of participants with missing data for each variable of interest                                                                                                                          | 9-10  |
|                          |     | (c) <i>Cohort study</i> —Summarise follow-up time (eg, average and total amount)                                                                                                                             | N/A   |
| Outcome data             | 15* | <i>Cohort study</i> —Report numbers of outcome events or summary measures over time                                                                                                                          | N/A   |
|                          |     | <i>Case-control study</i> —Report numbers in each exposure category, or summary measures of exposure                                                                                                         | N/A   |
|                          |     | <i>Cross-sectional study</i> —Report numbers of outcome events or summary measures                                                                                                                           | 13-14 |
| Main results             | 16  | (a) Give unadjusted estimates and, if applicable, confounder-adjusted estimates and their precision (eg, 95% confidence interval). Make clear which confounders were adjusted for and why they were included | 8-19  |
|                          |     | (b) Report category boundaries when continuous variables were categorized                                                                                                                                    | N/A   |
|                          |     | (c) If relevant, consider translating estimates of relative risk into absolute risk for a meaningful time period                                                                                             | N/A   |
| Other analyses           | 17  | Report other analyses done—eg analyses of subgroups and interactions, and sensitivity analyses                                                                                                               | 17-18 |
| <b>Discussion</b>        |     |                                                                                                                                                                                                              |       |
| Key results              | 18  | Summarise key results with reference to study objectives                                                                                                                                                     | 19    |
| Limitations              | 19  | Discuss limitations of the study, taking into account sources of potential bias or imprecision. Discuss both direction and magnitude of any potential bias                                                   | 25    |
| Interpretation           | 20  | Give a cautious overall interpretation of results considering objectives, limitations, multiplicity of analyses, results from similar studies, and other relevant evidence                                   | N/A   |
| Generalisability         | 21  | Discuss the generalisability (external validity) of the study results                                                                                                                                        | 25    |
| <b>Other information</b> |     |                                                                                                                                                                                                              |       |
| Funding                  | 22  | Give the source of funding and the role of the funders for the present study and, if applicable, for the original study on which the present article is based                                                | N/A   |

\*Give information separately for cases and controls in case-control studies and, if applicable, for exposed and unexposed groups in cohort and cross-sectional studies.

**Note:** An Explanation and Elaboration article discusses each checklist item and gives methodological background and published examples of transparent reporting. The STROBE checklist is best used in conjunction with this article (freely available on the Web sites of PLoS Medicine at <http://www.plosmedicine.org/>, Annals of Internal Medicine at <http://www.annals.org/>, and Epidemiology at <http://www.epidem.com/>). Information on the STROBE Initiative is available at [www.strobe-statement.org](http://www.strobe-statement.org).
